# Supplementary material for: Native lamin A/C proteomes and novel partners from heart and skeletal muscle in a mouse chronic inflammation model of human frailty
Source: Front Cell Dev Biol. 2023 Oct 23;11:1240285. doi: 10.3389/fcell.2023.1240285 (PMC10626543; doi:10.3389/fcell.2023.1240285)
Supplement: Supplementary file 4 [file Table4.xlsx]

## Sheet: HEART 
Reported intxn?	NET?	Nucleus?	gene_names	sign	p-value	log2.foldchange	Protein	Description
			Acsl1	KO < WT	4.63e-05	-0.581	PREDICTED: long-chain-fatty-acid--CoA ligase 1 isoform X1 [Mus musculus]	acyl-CoA synthetase long-chain family member 1; Activation of long-chain fatty acids for both synthesis of cellular lipids, and degradation via beta-oxidation. Preferentially uses palmitoleate, oleate and linoleate; Acyl-CoA synthetase family
			Hhatl	KO < WT	0.000348	-0.466	PREDICTED: protein-cysteine N-palmitoyltransferase HHAT-like protein isoform X1 [Mus musculus]; PREDICTED: protein-cysteine N-palmitoyltransferase HHAT-like protein isoform X2 [Mus musculus]; PREDICTED: protein-cysteine N-palmitoyltransferase HHAT-like protein isoform X3 [Mus musculus]	Protein-cysteine N-palmitoyltransferase HHAT-like protein; Negatively regulates N-terminal palmitoylation of SHH by HHAT/SKN; Belongs to the membrane-bound acyltransferase family. HHAT subfamily.
			Myl6	KO > WT	0.000775	1.07	PREDICTED: myosin light polypeptide 6-like [Mus musculus]; myosin light polypeptide 6 isoform a [Mus musculus]; myosin light polypeptide 6 isoform MLC3nm [Mus musculus]; myosin light polypeptide 6 isoform c [Mus musculus]; myosin light polypeptide 6 isoform b [Mus musculus]; myosin light polypeptide 6 isoform MLC3sm [Mus musculus]; PREDICTED: myosin light polypeptide 6 isoform X1 [Mus musculus]	Myosin, light chain 6, alkali, smooth muscle and non-muscle; Regulatory light chain of myosin. Does not bind calcium; EF-hand domain containing
			A1bg	KO < WT	0.00104	-1.35	alpha-1B-glycoprotein precursor [Mus musculus]	Alpha-1-B glycoprotein; Immunoglobulin like domain containing
			Cpt1b	KO < WT	0.00159	-0.205	carnitine O-palmitoyltransferase 1, muscle isoform [Mus musculus]	Carnitine O-palmitoyltransferase 1, muscle isoform; Carnitine palmitoyltransferase 1B
		YES	Got1	KO < WT	0.0031	-0.371	aspartate aminotransferase, cytoplasmic [Mus musculus]	Glutamic-oxaloacetic transaminase 1, soluble; Biosynthesis of L-glutamate from L-aspartate or L- cysteine. Important regulator of levels of glutamate, the major excitatory neurotransmitter of the vertebrate central nervous system. Acts as a scavenger of glutamate in brain neuroprotection. The aspartate aminotransferase activity is involved in hepatic glucose synthesis during development and in ad…
		YES	Aldoa	KO < WT	0.00311	-0.343	aldolase 1 A retrogene 1 [Mus musculus]; PREDICTED: fructose-bisphosphate aldolase A isoform X1 [Mus musculus]; PREDICTED: fructose-bisphosphate aldolase A isoform X2 [Mus musculus]	Aldolase A, fructose-bisphosphate; Plays a key role in glycolysis and gluconeogenesis. In addition, may also function as scaffolding protein (By similarity); Belongs to the class I fructose-bisphosphate aldolase family.
			Myl3	KO > WT	0.00327	0.837	myosin light chain 3 [Mus musculus]	Myosin light chain 1, slow-twitch muscle B/ventricular isoform; Regulatory light chain of myosin. Does not bind calcium; EF-hand domain containing
			Mybpc3	KO < WT	0.00824	-0.311	PREDICTED: myosin-binding protein C, cardiac-type isoform X2 [Mus musculus]; PREDICTED: myosin-binding protein C, cardiac-type isoform X1 [Mus musculus]	Myosin-binding protein C, cardiac-type; Thick filament-associated protein located in the crossbridge region of vertebrate striated muscle a bands. In vitro it binds MHC, F-actin and native thin filaments, and modifies the activity of actin-activated myosin ATPase. It may modulate muscle contraction or may play a more structural role; Fibronectin type III domain containing
			Pygb	KO > WT	0.00881	0.137	glycogen phosphorylase, brain form [Mus musculus]	Glycogen phosphorylase, brain form; Glycogen phosphorylase that regulates glycogen mobilization. Phosphorylase is an important allosteric enzyme in carbohydrate metabolism. Enzymes from different sources differ in their regulatory mechanisms and in their natural substrates. However, all known phosphorylases share catalytic and structural properties.
			Prxl2b	KO < WT	0.00931	-0.333	prostamide/prostaglandin F synthase [Mus musculus]
			Ckm	KO < WT	0.0124	-0.247	creatine kinase M-type [Mus musculus]	Creatine kinase M chain; Reversibly catalyzes the transfer of phosphate between ATP and various phosphogens (e.g. creatine phosphate). Creatine kinase isoenzymes play a central role in energy transduction in tissues with large, fluctuating energy demands, such as skeletal muscle, heart, brain and spermatozoa.
			Hk2	KO < WT	0.0144	-0.262	PREDICTED: hexokinase-2 isoform X1 [Mus musculus]; hexokinase-2 [Mus musculus]	Muscle form hexokinase; Hexokinase 2; Belongs to the hexokinase family.
		YES	Cryab	KO > WT	0.0145	0.42	PREDICTED: alpha-crystallin B chain isoform X1 [Mus musculus]	Renal carcinoma antigen NY-REN-27; May contribute to the transparency and refractive index of the lens. Has chaperone-like activity, preventing aggregation of various proteins under a wide range of stress conditions; Small heat shock proteins
			Npepps	KO < WT	0.0149	-0.464	PREDICTED: puromycin-sensitive aminopeptidase isoform X1 [Mus musculus]; PREDICTED: puromycin-sensitive aminopeptidase isoform X2 [Mus musculus]; puromycin-sensitive aminopeptidase [Mus musculus]	Aminopeptidase puromycin sensitive; Aminopeptidase with broad substrate specificity for several peptides. Involved in proteolytic events essential for cell growth and viability. May act as regulator of neuropeptide activity. Plays a role in the antigen-processing pathway for MHC class I molecules. Involved in the N-terminal trimming of cytotoxic T-cell epitope precursors. Digests the poly-Q pepti…
			MURC	KO < WT	0.0179	-0.209	caveolae-associated protein 4 [Mus musculus]	Muscle-restricted coiled-coil protein; Modulates the morphology of formed caveolae in cardiomyocytes, but is not required for caveolar formation. Facilitates the recruitment of MAPK1/3 to caveolae within cardiomyocytes and regulates alpha-1 adrenergic receptor-induced hypertrophic responses in cardiomyocytes through MAPK1/3 activation. Contributes to proper membrane localization and stabilization…
			Trf	KO < WT	0.0204	-0.484	serotransferrin precursor [Mus musculus]	Eosinophil differentiation factor; Factor that induces terminal differentiation of late- developing B-cells to immunoglobulin secreting cells; Belongs to the IL-5 family.
			Vwa8	KO < WT	0.0211	-0.326	von Willebrand factor A domain-containing protein 8 isoform 2 precursor [Mus musculus]; PREDICTED: von Willebrand factor A domain-containing protein 8 isoform X1 [Mus musculus]; PREDICTED: von Willebrand factor A domain-containing protein 8 isoform X3 [Mus musculus]; von Willebrand factor A domain-containing protein 8 isoform 1 precursor [Mus musculus]; PREDICTED: von Willebrand factor A domain-c…	Von Willebrand factor A domain-containing protein 8; Exhibits ATPase activity in vitro.
		YES	Myh9	KO > WT	0.0212	0.495	PREDICTED: myosin-14 isoform X1 [Mus musculus]; myosin-11 isoform 1 [Mus musculus]; PREDICTED: myosin-11 isoform X1 [Mus musculus]; myosin-9 [Mus musculus]; PREDICTED: myosin-11 isoform X2 [Mus musculus]; PREDICTED: myosin-14 isoform X2 [Mus musculus]; myosin-11 isoform 2 [Mus musculus]; myosin-14 isoform 1 [Mus musculus]	Cellular myosin heavy chain, type A; Cellular myosin that appears to play a role in cytokinesis, cell shape, and specialized functions such as secretion and capping. During cell spreading, plays an important role in cytoskeleton reorganization, focal contacts formation (in the margins but not the central part of spreading cells), and lamellipodial retraction; this function is mechanically antagon…
			Hrc	KO < WT	0.0233	-0.4	sarcoplasmic reticulum histidine-rich calcium-binding protein precursor [Mus musculus]	Sarcoplasmic reticulum histidine-rich calcium-binding protein; May play a role in the regulation of calcium sequestration or release in the SR of skeletal and cardiac muscle.
		YES	PTRF	KO < WT	0.0295	-0.355	caveolae-associated protein 1 [Mus musculus]; PREDICTED: polymerase I and transcript release factor isoform X1 [Mus musculus]	Polymerase I and transcript release factor; Plays an important role in caveolae formation and organization. Essential for the formation of caveolae in all tissues. Core component of the CAVIN complex which is essential for recruitment of the complex to the caveolae in presence of calveolin-1 (CAV1). Essential for normal oligomerization of CAV1. Promotes ribosomal transcriptional activity in respo…
		YES	Myh9	KO > WT	0.0309	0.431	myosin-9 [Mus musculus]	Cellular myosin heavy chain, type A; Cellular myosin that appears to play a role in cytokinesis, cell shape, and specialized functions such as secretion and capping. During cell spreading, plays an important role in cytoskeleton reorganization, focal contacts formation (in the margins but not the central part of spreading cells), and lamellipodial retraction; this function is mechanically antagon…
			Casq2	KO < WT	0.031	-0.479	calsequestrin-2 precursor [Mus musculus]; PREDICTED: calsequestrin-2 isoform X1 [Mus musculus]	Calsequestrin, cardiac muscle isoform; Calsequestrin is a high-capacity, moderate affinity, calcium-binding protein and thus acts as an internal calcium store in muscle. Calcium ions are bound by clusters of acidic residues at the protein surface, especially at the interface between subunits. Can bind around 60 Ca(2+) ions. Regulates the release of lumenal Ca(2+) via the calcium release channel R…
		YES	Myh10	KO > WT	0.0329	0.432	PREDICTED: myosin-10 isoform X2 [Mus musculus]; PREDICTED: myosin-10 isoform X3 [Mus musculus]; PREDICTED: myosin-10 isoform X1 [Mus musculus]; myosin-9 [Mus musculus]; myosin-10 [Mus musculus]	Cellular myosin heavy chain, type B; Cellular myosin that appears to play a role in cytokinesis, cell shape, and specialized functions such as secretion and capping. Involved with LARP6 in the stabilization of type I collagen mRNAs for CO1A1 and CO1A2. During cell spreading, plays an important role in cytoskeleton reorganization, focal contacts formation (in the central part but not the margins o…
			Serpina1b	KO < WT	0.0379	-0.354	alpha-1-antitrypsin 1-2 precursor [Mus musculus]
			Myh6	KO < WT	0.0404	-0.247	PREDICTED: myosin-6 isoform X1 [Mus musculus]; PREDICTED: myosin-1 isoform X1 [Mus musculus]; PREDICTED: myosin-3 isoform X1 [Mus musculus]; myosin-4 [Mus musculus]; myosin-2 [Mus musculus]; myosin-6 [Mus musculus]; PREDICTED: myosin-7 isoform X1 [Mus musculus]; myosin-8 [Mus musculus]	Myosin heavy chain, cardiac muscle alpha isoform; Muscle contraction; Belongs to the TRAFAC class myosin-kinesin ATPase superfamily. Myosin family.
		YES	Gins3	KO > WT	0.0408	1.83	DNA replication complex GINS protein PSF3 [Mus musculus]	GINS complex subunit 3
			Pygm	KO > WT	0.0412	0.141	glycogen phosphorylase, liver form [Mus musculus]; glycogen phosphorylase, muscle form [Mus musculus]; glycogen phosphorylase, brain form [Mus musculus]	Glycogen phosphorylase, muscle form; Phosphorylase is an important allosteric enzyme in carbohydrate metabolism. Enzymes from different sources differ in their regulatory mechanisms and in their natural substrates. However, all known phosphorylases share catalytic and structural properties.
			Etfb	KO > WT	0.0417	0.237	electron transfer flavoprotein subunit beta [Mus musculus]	Electron-transfer-flavoprotein, beta polypeptide; Heterodimeric electron transfer flavoprotein that accepts electrons from several mitochondrial dehydrogenases, including acyl-CoA dehydrogenases, glutaryl-CoA and sarcosine dehydrogenase. It transfers the electrons to the main mitochondrial respiratory chain via ETF-ubiquinone oxidoreductase (Probable). Required for normal mitochondrial fatty acid…
		YES	Myh10	KO > WT	0.042	0.377	PREDICTED: myosin-10 isoform X2 [Mus musculus]; PREDICTED: myosin-10 isoform X3 [Mus musculus]; PREDICTED: myosin-10 isoform X1 [Mus musculus]; myosin-10 [Mus musculus]	Cellular myosin heavy chain, type B; Cellular myosin that appears to play a role in cytokinesis, cell shape, and specialized functions such as secretion and capping. Involved with LARP6 in the stabilization of type I collagen mRNAs for CO1A1 and CO1A2. During cell spreading, plays an important role in cytoskeleton reorganization, focal contacts formation (in the central part but not the margins o…
		YES	Hsp90b1	KO < WT	0.0532	-0.317	endoplasmin precursor [Mus musculus]	Heat shock protein 90kDa beta (Grp94), member 1; Molecular chaperone that functions in the processing and transport of secreted proteins. When associated with CNPY3, required for proper folding of Toll-like receptors (By similarity). Functions in endoplasmic reticulum associated degradation (ERAD). Has ATPase activity; Belongs to the heat shock protein 90 family.
			Myl3	KO > WT	0.0536	0.639	PREDICTED: myosin light chain 4 isoform X2 [Mus musculus]; myosin light chain 3 [Mus musculus]; PREDICTED: myosin light chain 4 isoform X1 [Mus musculus]	Myosin light chain 1, slow-twitch muscle B/ventricular isoform; Regulatory light chain of myosin. Does not bind calcium; EF-hand domain containing
		YES	Ahnak	KO < WT	0.0572	-0.363	PREDICTED: neuroblast differentiation-associated protein AHNAK isoform X3 [Mus musculus]; PREDICTED: neuroblast differentiation-associated protein AHNAK isoform X1 [Mus musculus]; PREDICTED: neuroblast differentiation-associated protein AHNAK isoform X2 [Mus musculus]	Neuroblast differentiation-associated protein AHNAK; May be required for neuronal cell differentiation; PDZ domain containing
		YES	Eef2	KO < WT	0.0588	-0.299	elongation factor 2 [Mus musculus]	Eukaryotic translation elongation factor 2; Catalyzes the GTP-dependent ribosomal translocation step during translation elongation. During this step, the ribosome changes from the pre-translocational (PRE) to the post- translocational (POST) state as the newly formed A-site-bound peptidyl-tRNA and P-site-bound deacylated tRNA move to the P and E sites, respectively. Catalyzes the coordinated move…
		YES	Hsp90ab1	KO < WT	0.0594	-0.242	heat shock protein HSP 90-alpha [Mus musculus]; heat shock protein HSP 90-beta [Mus musculus]	Heat shock protein 90kDa alpha (cytosolic), class B member 1; Molecular chaperone that promotes the maturation, structural maintenance and proper regulation of specific target proteins involved for instance in cell cycle control and signal transduction. Undergoes a functional cycle that is linked to its ATPase activity. This cycle probably induces conformational changes in the client proteins, th…
		YES	Alb	KO < WT	0.0652	-0.438	serum albumin preproprotein [Mus musculus]	Serum albumin; Serum albumin, the main protein of plasma, has a good binding capacity for water, Ca(2+), Na(+), K(+), fatty acids, hormones, bilirubin and drugs. Its main function is the regulation of the colloidal osmotic pressure of blood. Major zinc transporter in plasma, typically binds about 80% of all plasma zinc; Belongs to the ALB/AFP/VDB family.
		YES	Myh10	KO > WT	0.0682	0.423	myosin-11 isoform 1 [Mus musculus]; PREDICTED: myosin-10 isoform X2 [Mus musculus]; PREDICTED: myosin-11 isoform X3 [Mus musculus]; PREDICTED: myosin-11 isoform X1 [Mus musculus]; PREDICTED: myosin-10 isoform X3 [Mus musculus]; PREDICTED: myosin-10 isoform X1 [Mus musculus]; myosin-9 [Mus musculus]; PREDICTED: myosin-11 isoform X2 [Mus musculus]; myosin-11 isoform 2 [Mus musculus]; myosin-10 [Mus…	Cellular myosin heavy chain, type B; Cellular myosin that appears to play a role in cytokinesis, cell shape, and specialized functions such as secretion and capping. Involved with LARP6 in the stabilization of type I collagen mRNAs for CO1A1 and CO1A2. During cell spreading, plays an important role in cytoskeleton reorganization, focal contacts formation (in the central part but not the margins o…
		YES	Synpo2l	KO < WT	0.0717	-0.211	PREDICTED: synaptopodin 2-like protein isoform X3 [Mus musculus]; PREDICTED: synaptopodin 2-like protein isoform X1 [Mus musculus]; synaptopodin 2-like protein isoform 2 [Mus musculus]; PREDICTED: synaptopodin 2-like protein isoform X2 [Mus musculus]; synaptopodin 2-like protein isoform 1 [Mus musculus]	Synaptopodin 2-like protein; Actin-associated protein that may play a role in modulating actin-based shape; PDZ domain containing
			Fcgbp	KO > WT	0.0721	0.914	Fc fragment of IgG binding protein-like precursor [Mus musculus]; IgGFc-binding protein precursor [Mus musculus]	Fc fragment of IgG binding protein
			Ndufa4	KO > WT	0.0728	0.554	cytochrome c oxidase subunit NDUFA4 [Mus musculus]	NADH-ubiquinone oxidoreductase MLRQ subunit; Cytochrome c oxidase (COX, complex IV) is the terminal component of the mitochondrial respiratory chain that catalyzes the reduction of oxygen to water. Required for complex IV maintenance.
			Serpinf2	KO > WT	0.0789	0.387	alpha-2-antiplasmin precursor [Mus musculus]	Alpha-2-plasmin inhibitor; Serine protease inhibitor. The major targets of this inhibitor are plasmin and trypsin, but it also inactivates matriptase-3/TMPRSS7 and chymotrypsin; Serpin peptidase inhibitors
		YES	Myh10	KO < WT	0.0827	-0.243	PREDICTED: myosin-15 isoform X1 [Mus musculus]; PREDICTED: myosin-14 isoform X1 [Mus musculus]; myosin-11 isoform 1 [Mus musculus]; PREDICTED: myosin-10 isoform X2 [Mus musculus]; PREDICTED: myosin-7B isoform X4 [Mus musculus]; PREDICTED: myosin-6 isoform X1 [Mus musculus]; PREDICTED: myosin-1 isoform X1 [Mus musculus]; PREDICTED: myosin-7B isoform X2 [Mus musculus]; PREDICTED: myosin-3 isoform X…	Cellular myosin heavy chain, type B; Cellular myosin that appears to play a role in cytokinesis, cell shape, and specialized functions such as secretion and capping. Involved with LARP6 in the stabilization of type I collagen mRNAs for CO1A1 and CO1A2. During cell spreading, plays an important role in cytoskeleton reorganization, focal contacts formation (in the central part but not the margins o…
			Nes	KO > WT	0.0828	0.527	nestin [Mus musculus]	Nestin; Required for brain and eye development. Promotes the disassembly of phosphorylated vimentin intermediate filaments (IF) during mitosis and may play a role in the trafficking and distribution of IF proteins and other cellular factors to daughter cells during progenitor cell division. Required for survival, renewal and mitogen-stimulated proliferation of neural progenitor cells (By similari…
			Actb	KO > WT	0.083	0.249	actin, gamma-enteric smooth muscle [Mus musculus]; PREDICTED: actin, aortic smooth muscle isoform X1 [Mus musculus]; actin, cytoplasmic 1 [Mus musculus]; actin, aortic smooth muscle [Mus musculus]; actin, alpha skeletal muscle [Mus musculus]; actin, alpha cardiac muscle 1 [Mus musculus]; actin, cytoplasmic 2 isoform 1 [Mus musculus]	Actin, cytoplasmic 1; Actins are highly conserved proteins that are involved in various types of cell motility and are ubiquitously expressed in all eukaryotic cells.
			Kng1	KO < WT	0.0835	-0.227	kininogen-1 isoform 1 precursor [Mus musculus]; kininogen-1 isoform 2 precursor [Mus musculus]; kininogen-1 isoform 3 precursor [Mus musculus]; PREDICTED: kininogen-1 isoform X2 [Mus musculus]	Williams-Fitzgerald-Flaujeac factor; (1) Kininogens are inhibitors of thiol proteases; (2) HMW-kininogen plays an important role in blood coagulation by helping to position optimally prekallikrein and factor XI next to factor XII; (3) HMW-kininogen inhibits the thrombin- and plasmin- induced aggregation of thrombocytes; (4) the active peptide bradykinin that is released from HMW-kininogen shows a…
			Grin2d	KO < WT	0.0865	-0.508	PREDICTED: glutamate receptor ionotropic, NMDA 2D isoform X1 [Mus musculus]; PREDICTED: glutamate receptor ionotropic, NMDA 2D isoform X6 [Mus musculus]; PREDICTED: glutamate receptor ionotropic, NMDA 2D isoform X2 [Mus musculus]; PREDICTED: glutamate receptor ionotropic, NMDA 2D isoform X4 [Mus musculus]; PREDICTED: glutamate receptor ionotropic, NMDA 2D isoform X3 [Mus musculus]; PREDICTED: glu…	Glutamate receptor, ionotropic, N-methyl D-aspartate 2D; Component of NMDA receptor complexes that function as heterotetrameric, ligand-gated ion channels with high calcium permeability and voltage-dependent sensitivity to magnesium. Channel activation requires binding of the neurotransmitter glutamate to the epsilon subunit, glycine binding to the zeta subunit, plus membrane depolarization to el…
			Abcc10	KO > WT	0.0901	1.33	multidrug resistance-associated protein 7 isoform mrp7B [Mus musculus]; multidrug resistance-associated protein 7 isoform mrp7A [Mus musculus]; PREDICTED: multidrug resistance-associated protein 7 isoform X3 [Mus musculus]; multidrug resistance-associated protein 7 isoform 3 [Mus musculus]	ATP-binding cassette, sub-family C (CFTR/MRP), member 10; ATP-dependent transporter probably involved in cellular detoxification through lipophilic anion extrusion; ATP binding cassette subfamily C
			Gpi1	KO < WT	0.0922	-0.359	glucose-6-phosphate isomerase [Mus musculus]	Phosphatidylinositol N-acetylglucosaminyltransferase subunit Q; Part of the complex catalyzing the transfer of N- acetylglucosamine from UDP-N-acetylglucosamine to phosphatidylinositol, the first step of GPI biosynthesis; Belongs to the PIGQ family.
		YES	Tubb4a	KO < WT	0.0929	-0.214	tubulin beta-2A chain [Mus musculus]; tubulin beta-4A chain [Mus musculus]; tubulin beta-5 chain [Mus musculus]; tubulin beta-4B chain [Mus musculus]; tubulin beta-2B chain [Mus musculus]	Tubulin, beta 4A class IVa; Tubulin is the major constituent of microtubules. It binds two moles of GTP, one at an exchangeable site on the beta chain and one at a non-exchangeable site on the alpha chain; Tubulins
			Nipsnap2	KO > WT	0.0936	0.384	protein NipSnap homolog 2 [Mus musculus]	Glioblastoma amplified sequence; May act as a positive regulator of L-type calcium channels; Belongs to the NipSnap family.
			Ces1c	KO < WT	0.0983	-0.373	carboxylesterase 1C precursor [Mus musculus]
		YES	Hnrnpc	KO < WT	0.102	-1.1	PREDICTED: heterogeneous nuclear ribonucleoproteins C1/C2 isoform X1 [Mus musculus]; PREDICTED: heterogeneous nuclear ribonucleoproteins C1/C2 isoform X2 [Mus musculus]; PREDICTED: heterogeneous nuclear ribonucleoproteins C1/C2 isoform X4 [Mus musculus]; PREDICTED: heterogeneous nuclear ribonucleoproteins C1/C2 isoform X6 [Mus musculus]; PREDICTED: heterogeneous nuclear ribonucleoproteins C1/C2 i…	Heterogeneous nuclear ribonucleoprotein C (C1/C2); Binds pre-mRNA and nucleates the assembly of 40S hnRNP particles. Interacts with poly-U tracts in the 3'-UTR or 5'-UTR of mRNA and modulates the stability and the level of translation of bound mRNA molecules. Single HNRNPC tetramers bind 230-240 nucleotides. Trimers of HNRNPC tetramers bind 700 nucleotides. May play a role in the early steps of s…
			Hsd17b4	KO < WT	0.102	-0.211	peroxisomal multifunctional enzyme type 2 [Mus musculus]	Short chain dehydrogenase/reductase family 8C member 1; Bifunctional enzyme acting on the peroxisomal beta- oxidation pathway for fatty acids. Catalyzes the formation of 3- ketoacyl-CoA intermediates from both straight-chain and 2-methyl- branched-chain fatty acids; Short chain dehydrogenase/reductase superfamily
		YES	Speg	KO < WT	0.104	-0.364	PREDICTED: striated muscle-specific serine/threonine-protein kinase isoform X9 [Mus musculus]; PREDICTED: striated muscle-specific serine/threonine-protein kinase isoform X7 [Mus musculus]; PREDICTED: striated muscle-specific serine/threonine-protein kinase isoform X6 [Mus musculus]; PREDICTED: striated muscle-specific serine/threonine-protein kinase isoform X10 [Mus musculus]; PREDICTED: striate…	Striated muscle preferentially expressed protein kinase; Isoform 3 may have a role in regulating the growth and differentiation of arterial smooth muscle cells; I-set domain containing
		YES	Actb	KO > WT	0.104	0.228	actin, cytoplasmic 1 [Mus musculus]; actin, cytoplasmic 2 isoform 1 [Mus musculus]; actin, cytoplasmic 2 isoform 2 [Mus musculus]	Actin, cytoplasmic 1; Actins are highly conserved proteins that are involved in various types of cell motility and are ubiquitously expressed in all eukaryotic cells.
		YES	Bag3	KO < WT	0.105	-0.653	BAG family molecular chaperone regulator 3 [Mus musculus]	BAG family molecular chaperone regulator 3; Co-chaperone for HSP70 and HSC70 chaperone proteins. Acts as a nucleotide-exchange factor (NEF) promoting the release of ADP from the HSP70 and HSC70 proteins thereby triggering client/substrate protein release. Nucleotide release is mediated via its binding to the nucleotide-binding domain (NBD) of HSPA8/HSC70 where as the substrate release is mediated…
		YES	Irak2	KO > WT	0.113	0.884	interleukin-1 receptor-associated kinase-like 2 isoform a [Mus musculus]; PREDICTED: interleukin-1 receptor-associated kinase-like 2 isoform X1 [Mus musculus]; interleukin-1 receptor-associated kinase-like 2 isoform b [Mus musculus]	Interleukin-1 receptor-associated kinase-like 2; Binds to the IL-1 type I receptor following IL-1 engagement, triggering intracellular signaling cascades leading to transcriptional up-regulation and mRNA stabilization.
		YES	Myh9	KO > WT	0.116	0.37	myosin-11 isoform 1 [Mus musculus]; PREDICTED: myosin-11 isoform X1 [Mus musculus]; myosin-9 [Mus musculus]; PREDICTED: myosin-11 isoform X2 [Mus musculus]; myosin-11 isoform 2 [Mus musculus]	Cellular myosin heavy chain, type A; Cellular myosin that appears to play a role in cytokinesis, cell shape, and specialized functions such as secretion and capping. During cell spreading, plays an important role in cytoskeleton reorganization, focal contacts formation (in the margins but not the central part of spreading cells), and lamellipodial retraction; this function is mechanically antagon…
			Tpm1	KO > WT	0.117	0.432	tropomyosin alpha-1 chain isoform Tpm1.13 [Mus musculus]; tropomyosin alpha-1 chain isoform Tpm1.5cy [Mus musculus]; PREDICTED: tropomyosin alpha-1 chain isoform X7 [Mus musculus]; PREDICTED: tropomyosin alpha-1 chain isoform X5 [Mus musculus]; tropomyosin alpha-1 chain isoform Tpm1.1st [Mus musculus]	Tropomyosin alpha-1 chain; Tropomyosin 1; Tropomyosins
			Slc16a1	KO < WT	0.121	-0.116	monocarboxylate transporter 1 [Mus musculus]	Solute carrier family 16 (monocarboxylate transporter), member 1; Proton-coupled monocarboxylate transporter. Catalyzes the rapid transport across the plasma membrane of many monocarboxylates such as lactate, pyruvate, branched-chain oxo acids derived from leucine, valine and isoleucine, and the ketone bodies acetoacetate, beta-hydroxybutyrate and acetate. Depending on the tissue and on cicumstan…
			Uroc1	KO > WT	0.123	0.376	urocanate hydratase isoform 1 [Mus musculus]; urocanate hydratase isoform 2 [Mus musculus]; PREDICTED: urocanate hydratase isoform X2 [Mus musculus]	Imidazolonepropionate hydrolase; Urocanate hydratase 1
		YES	Chchd3	KO > WT	0.124	0.509	MICOS complex subunit Mic19 [Mus musculus]; PREDICTED: MICOS complex subunit Mic19 isoform X1 [Mus musculus]	Coiled-coil-helix-coiled-coil-helix domain-containing protein 3; Component of the MICOS complex, a large protein complex of the mitochondrial inner membrane that plays crucial roles in the maintenance of crista junctions, inner membrane architecture, and formation of contact sites to the outer membrane. Has also been shown to function as a transcription factor which binds to the BAG1 promoter and…
			Olfr703	KO > WT	0.124	0.769	olfactory receptor 703 [Mus musculus]; olfactory receptor 699 [Mus musculus]; PREDICTED: olfactory receptor 694 isoform X1 [Mus musculus]; olfactory receptor 1395 [Mus musculus]; olfactory receptor 697 [Mus musculus]; olfactory receptor 700 [Mus musculus]; olfactory receptor 704 [Mus musculus]
			Cp	KO < WT	0.124	-0.541	ceruloplasmin isoform c precursor [Mus musculus]; PREDICTED: ceruloplasmin isoform X1 [Mus musculus]; PREDICTED: ceruloplasmin isoform X2 [Mus musculus]; ceruloplasmin isoform b precursor [Mus musculus]	Ceruloplasmin (ferroxidase); Ceruloplasmin is a blue, copper-binding (6-7 atoms per molecule) glycoprotein. It has ferroxidase activity oxidizing Fe(2+) to Fe(3+) without releasing radical oxygen species. It is involved in iron transport across the cell membrane. Provides Cu(2+) ions for the ascorbate-mediated deaminase degradation of the heparan sulfate chains of GPC1. May also play a role in fe…
		YES	Pkp2	KO < WT	0.125	-0.302	plakophilin-2 [Mus musculus]	Plakophilin 2; May play a role in junctional plaques; Armadillo repeat containing
			C4b	KO > WT	0.132	0.469	PREDICTED: complement C4-B isoform X2 [Mus musculus]; complement C4-B precursor [Mus musculus]; PREDICTED: complement C4-B isoform X1 [Mus musculus]	C3 and PZP-like alpha-2-macroglobulin domain-containing protein 3; Non-enzymatic component of the C3 and C5 convertases and thus essential for the propagation of the classical complement pathway. Covalently binds to immunoglobulins and immune complexes and enhances the solubilization of immune aggregates and the clearance of IC through CR1 on erythrocytes. C4A isotype is responsible for effective…
		YES	Hnrnpm	KO < WT	0.132	-0.354	heterogeneous nuclear ribonucleoprotein M isoform b [Mus musculus]; heterogeneous nuclear ribonucleoprotein M isoform a [Mus musculus]	Heterogeneous nuclear ribonucleoprotein M; Pre-mRNA binding protein in vivo, binds avidly to poly(G) and poly(U) RNA homopolymers in vitro. Involved in splicing. Acts as a receptor for carcinoembryonic antigen in Kupffer cells, may initiate a series of signaling events leading to tyrosine phosphorylation of proteins and induction of IL-1 alpha, IL-6, IL-10 and tumor necrosis factor alpha cytokine…
		YES	Hspa5	KO > WT	0.132	0.414	78 kDa glucose-regulated protein precursor [Mus musculus]	Heat shock 70kDa protein 5 (glucose-regulated protein, 78kDa); Plays a role in facilitating the assembly of multimeric protein complexes inside the endoplasmic reticulum. Involved in the correct folding of proteins and degradation of misfolded proteins via its interaction with DNAJC10, probably to facilitate the release of DNAJC10 from its substrate (By similarity); Belongs to the heat shock prot…
			Acta2	KO > WT	0.133	0.293	actin, aortic smooth muscle [Mus musculus]; actin, alpha skeletal muscle [Mus musculus]; actin, alpha cardiac muscle 1 [Mus musculus]	Cell growth-inhibiting gene 46 protein; Actins are highly conserved proteins that are involved in various types of cell motility and are ubiquitously expressed in all eukaryotic cells; Belongs to the actin family.
			Atp2a2	KO < WT	0.138	-0.175	sarcoplasmic/endoplasmic reticulum calcium ATPase 2 isoform a [Mus musculus]; sarcoplasmic/endoplasmic reticulum calcium ATPase 2 isoform b [Mus musculus]	Calcium-transporting ATPase sarcoplasmic reticulum type, slow twitch skeletal muscle isoform; This magnesium-dependent enzyme catalyzes the hydrolysis of ATP coupled with the translocation of calcium from the cytosol to the sarcoplasmic reticulum lumen. Isoform 2 is involved in the regulation of the contraction/relaxation cycle. Acts as a regulator of TNFSF11-mediated Ca(2+) signaling pathways vi…
		YES	Hnrnpa2b1	KO > WT	0.142	0.485	heterogeneous nuclear ribonucleoproteins A2/B1 isoform 2 [Mus musculus]; PREDICTED: heterogeneous nuclear ribonucleoproteins A2/B1 isoform X1 [Mus musculus]; heterogeneous nuclear ribonucleoproteins A2/B1 isoform 1 [Mus musculus]	Heterogeneous nuclear ribonucleoproteins A2/B1; Heterogeneous nuclear ribonucleoprotein (hnRNP) that associates with nascent pre-mRNAs, packaging them into hnRNP particles. The hnRNP particle arrangement on nascent hnRNA is non- random and sequence-dependent and serves to condense and stabilize the transcripts and minimize tangling and knotting. Packaging plays a role in various processes such as…
			Dars	KO < WT	0.142	-0.264	aspartate--tRNA ligase, cytoplasmic isoform 1 [Mus musculus]; aspartate--tRNA ligase, cytoplasmic isoform 2 [Mus musculus]	Cell proliferation-inducing gene 40 protein; Catalyzes the specific attachment of an amino acid to its cognate tRNA in a 2 step reaction: the amino acid (AA) is first activated by ATP to form AA-AMP and then transferred to the acceptor end of the tRNA; Belongs to the class-II aminoacyl-tRNA synthetase family. Type 2 subfamily.
			Tfg	KO > WT	0.148	0.766	PREDICTED: protein TFG isoform X1 [Mus musculus]; PREDICTED: protein TFG isoform X3 [Mus musculus]; PREDICTED: protein TFG isoform X4 [Mus musculus]; PREDICTED: protein TFG isoform X2 [Mus musculus]; protein TFG isoform 2 [Mus musculus]	TRK-fused gene protein; Plays a role in the normal dynamic function of the endoplasmic reticulum (ER) and its associated microtubules.
			Paics	KO < WT	0.151	-15	PREDICTED: multifunctional protein ADE2 isoform X1 [Mus musculus]; PREDICTED: multifunctional protein ADE2 isoform X2 [Mus musculus]	Multifunctional protein ADE2; Phosphoribosylaminoimidazole carboxylase and phosphoribosylaminoimidazolesuccinocarboxamide synthase; In the C-terminal section; belongs to the AIR carboxylase family. Class II subfamily.
		YES	Fabp4	KO > WT	0.153	7.68	fatty acid-binding protein, adipocyte [Mus musculus]; PREDICTED: fatty acid-binding protein, adipocyte isoform X1 [Mus musculus]	Adipocyte-type fatty acid-binding protein; Lipid transport protein in adipocytes. Binds both long chain fatty acids and retinoic acid. Delivers long-chain fatty acids and retinoic acid to their cognate receptors in the nucleus (By similarity); Belongs to the calycin superfamily. Fatty-acid binding protein (FABP) family.
		YES	Uprt	KO > WT	0.155	0.892	uracil phosphoribosyltransferase homolog [Mus musculus]	Uracil phosphoribosyltransferase homolog; Belongs to the UPRTase family.
			Dync1h1	KO < WT	0.156	-0.342	cytoplasmic dynein 1 heavy chain 1 [Mus musculus]	Dynein, cytoplasmic 1, heavy chain 1; Cytoplasmic dynein 1 acts as a motor for the intracellular retrograde motility of vesicles and organelles along microtubules. Dynein has ATPase activity; the force-producing power stroke is thought to occur on release of ADP. Plays a role in mitotic spindle assembly and metaphase plate congression; Belongs to the dynein heavy chain family.
		YES	Acot13	KO > WT	0.158	0.402	acyl-coenzyme A thioesterase 13 [Mus musculus]	Thioesterase superfamily member 2; Acyl-CoA thioesterases are a group of enzymes that catalyze the hydrolysis of acyl-CoAs to the free fatty acid and coenzyme A (CoASH), providing the potential to regulate intracellular levels of acyl-CoAs, free fatty acids and CoASH. Has acyl-CoA thioesterase activity towards medium (C12) and long-chain (C18) fatty acyl-CoA substrates. Can also hydrolyze 3- hydr…
			Ryr2	KO < WT	0.161	-0.122	ryanodine receptor 2 [Mus musculus]; PREDICTED: ryanodine receptor 2 isoform X6 [Mus musculus]; PREDICTED: ryanodine receptor 2 isoform X14 [Mus musculus]; PREDICTED: ryanodine receptor 2 isoform X4 [Mus musculus]; PREDICTED: ryanodine receptor 2 isoform X19 [Mus musculus]; PREDICTED: ryanodine receptor 2 isoform X3 [Mus musculus]; PREDICTED: ryanodine receptor 2 isoform X17 [Mus musculus]; PREDI…	Cardiac muscle ryanodine receptor-calcium release channel; Calcium channel that mediates the release of Ca(2+) from the sarcoplasmic reticulum into the cytoplasm and thereby plays a key role in triggering cardiac muscle contraction. Aberrant channel activation can lead to cardiac arrhythmia. In cardiac myocytes, calcium release is triggered by increased Ca(2+) levels due to activation of the L-ty…
			Myl12b	KO > WT	0.161	0.556	PREDICTED: myosin regulatory light chain 2, ventricular/cardiac muscle isoform isoform X1 [Mus musculus]; myosin regulatory light chain 2, ventricular/cardiac muscle isoform [Mus musculus]	Myosin regulatory light chain 2-B, smooth muscle isoform; Myosin regulatory subunit that plays an important role in regulation of both smooth muscle and nonmuscle cell contractile activity via its phosphorylation. Phosphorylation triggers actin polymerization in vascular smooth muscle. Implicated in cytokinesis, receptor capping, and cell locomotion; EF-hand domain containing
		YES	Taf15	KO > WT	0.163	0.585	PREDICTED: TATA-binding protein-associated factor 2N isoform X1 [Mus musculus]; RNA-binding protein FUS isoform 1 [Mus musculus]; PREDICTED: TATA-binding protein-associated factor 2N isoform X3 [Mus musculus]; PREDICTED: RNA-binding protein FUS isoform X2 [Mus musculus]; TATA-binding protein-associated factor 2N [Mus musculus]; RNA-binding protein FUS isoform 2 [Mus musculus]; PREDICTED: TATA-bin…	TAF15 RNA polymerase II, TATA box binding protein (TBP)-associated factor, 68kDa; RNA and ssDNA-binding protein that may play specific roles during transcription initiation at distinct promoters. Can enter the preinitiation complex together with the RNA polymerase II (Pol II).
		YES	Pkm	KO < WT	0.165	-0.181	PREDICTED: pyruvate kinase PKM isoform X3 [Mus musculus]; PREDICTED: pyruvate kinase PKM isoform X2 [Mus musculus]; PREDICTED: pyruvate kinase PKM isoform X4 [Mus musculus]; PREDICTED: pyruvate kinase PKM isoform X1 [Mus musculus]	Cytosolic thyroid hormone-binding protein; Glycolytic enzyme that catalyzes the transfer of a phosphoryl group from phosphoenolpyruvate (PEP) to ADP, generating ATP. Stimulates POU5F1-mediated transcriptional activation. Plays a general role in caspase independent cell death of tumor cells. The ratio between the highly active tetrameric form and nearly inactive dimeric form determines whether glu…
		YES	HIST1H1E	KO < WT	0.169	-0.744	histone H1.4 [Mus musculus]	Histone cluster 1, H1e; Histone H1 protein binds to linker DNA between nucleosomes forming the macromolecular structure known as the chromatin fiber. Histones H1 are necessary for the condensation of nucleosome chains into higher-order structured fibers. Acts also as a regulator of individual gene transcription through chromatin remodeling, nucleosome spacing and DNA methylation (By similarity).
		YES	Obscn	KO < WT	0.17	-0.356	obscurin isoform 1 [Mus musculus]; obscurin isoform 2 [Mus musculus]	Obscurin, cytoskeletal calmodulin and titin-interacting RhoGEF; Fibronectin type III domain containing
		YES	Skp1	KO > WT	0.174	0.483	PREDICTED: S-phase kinase-associated protein 1 isoform X1 [Mus musculus]	Transcription elongation factor B polypeptide 1-like; Essential component of the SCF (SKP1-CUL1-F-box protein) ubiquitin ligase complex, which mediates the ubiquitination of proteins involved in cell cycle progression, signal transduction and transcription. In the SCF complex, serves as an adapter that links the F-box protein to CUL1. The functional specificity of the SCF complex depends on the F…
		YES	Dsp	KO < WT	0.174	-0.204	desmoplakin [Mus musculus]	250/210 kDa paraneoplastic pemphigus antigen; Major high molecular weight protein of desmosomes. Involved in the organization of the desmosomal cadherin- plakoglobin complexes into discrete plasma membrane domains and in the anchoring of intermediate filaments to the desmosomes; Belongs to the plakin or cytolinker family.
			Tnni3	KO > WT	0.176	0.332	PREDICTED: troponin I, cardiac muscle isoform X1 [Mus musculus]; troponin I, cardiac muscle [Mus musculus]	Troponin I type 3 (cardiac); Troponin I is the inhibitory subunit of troponin, the thin filament regulatory complex which confers calcium-sensitivity to striated muscle actomyosin ATPase activity.
		YES	HIST1H1E	KO < WT	0.178	-0.584	histone H1.4 [Mus musculus]; histone H1t [Mus musculus]; histone H1.2 [Mus musculus]; histone H1.3 [Mus musculus]	Histone cluster 1, H1e; Histone H1 protein binds to linker DNA between nucleosomes forming the macromolecular structure known as the chromatin fiber. Histones H1 are necessary for the condensation of nucleosome chains into higher-order structured fibers. Acts also as a regulator of individual gene transcription through chromatin remodeling, nucleosome spacing and DNA methylation (By similarity).
			Igj	KO > WT	0.179	0.756	immunoglobulin J chain precursor [Mus musculus]	Immunoglobulin J polypeptide, linker protein for immunoglobulin alpha and mu polypeptides; Serves to link two monomer units of either IgM or IgA. In the case of IgM, the J chain-joined dimer is a nucleating unit for the IgM pentamer, and in the case of IgA it induces larger polymers. It also help to bind these immunoglobulins to secretory component.
			Nid1	KO < WT	0.184	-0.398	nidogen-1 precursor [Mus musculus]	Nidogen 1; Sulfated glycoprotein widely distributed in basement membranes and tightly associated with laminin. Also binds to collagen IV and perlecan. It probably has a role in cell- extracellular matrix interactions.
			Tcp1	KO < WT	0.187	-0.374	T-complex protein 1 subunit alpha isoform 2 [Mus musculus]; T-complex protein 1 subunit alpha isoform 1 [Mus musculus]	T-complex protein 1 subunit alpha; Molecular chaperone; assists the folding of proteins upon ATP hydrolysis. As part of the BBS/CCT complex may play a role in the assembly of BBSome, a complex involved in ciliogenesis regulating transports vesicles to the cilia. Known to play a role, in vitro, in the folding of actin and tubulin; Belongs to the TCP-1 chaperonin family.
			Pygm	KO > WT	0.189	0.0474	glycogen phosphorylase, muscle form [Mus musculus]	Glycogen phosphorylase, muscle form; Phosphorylase is an important allosteric enzyme in carbohydrate metabolism. Enzymes from different sources differ in their regulatory mechanisms and in their natural substrates. However, all known phosphorylases share catalytic and structural properties.
			Crocc	KO < WT	0.189	-0.229	rootletin isoform 1 [Mus musculus]; PREDICTED: rootletin isoform X2 [Mus musculus]; PREDICTED: rootletin isoform X1 [Mus musculus]; rootletin isoform 2 [Mus musculus]	Ciliary rootlet coiled-coil, rootletin; Major structural component of the ciliary rootlet, a cytoskeletal-like structure in ciliated cells which originates from the basal body at the proximal end of a cilium and extends proximally toward the cell nucleus (By similarity). Furthermore, is required for the correct positioning of the cilium basal body relative to the cell nucleus, to allow for ciliog…
			Bag2	KO > WT	0.189	0.412	PREDICTED: BAG family molecular chaperone regulator 2 isoform X1 [Mus musculus]; BAG family molecular chaperone regulator 2 [Mus musculus]	BAG family molecular chaperone regulator 2; Co-chaperone for HSP70 and HSC70 chaperone proteins. Acts as a nucleotide-exchange factor (NEF) promoting the release of ADP from the HSP70 and HSC70 proteins thereby triggering client/substrate protein release; BCL2 associated athanogene family
			Arhgap31	KO < WT	0.191	-0.257	rho GTPase-activating protein 31 [Mus musculus]	Rho GTPase activating protein 31; Functions as a GTPase-activating protein (GAP) for RAC1 and CDC42. Required for cell spreading, polarized lamellipodia formation and cell migration.
		YES	Sorbs2	KO < WT	0.193	-0.354	PREDICTED: sorbin and SH3 domain-containing protein 2 isoform X23 [Mus musculus]; PREDICTED: sorbin and SH3 domain-containing protein 2 isoform X14 [Mus musculus]; PREDICTED: sorbin and SH3 domain-containing protein 2 isoform X22 [Mus musculus]; PREDICTED: sorbin and SH3 domain-containing protein 2 isoform X24 [Mus musculus]; PREDICTED: sorbin and SH3 domain-containing protein 2 isoform X5 [Mus m…	Sorbin and SH3 domain-containing protein 2; Adapter protein that plays a role in the assembling of signaling complexes, being a link between ABL kinases and actin cytoskeleton. Can form complex with ABL1 and CBL, thus promoting ubiquitination and degradation of ABL1 or with AKT1 and PAK1, thus mediating AKT1-mediated activation of PAK1. May play a role in the regulation of pancreatic cell adhesio…
		YES	Hsp90ab1	KO < WT	0.195	-0.181	heat shock protein HSP 90-beta [Mus musculus]; endoplasmin precursor [Mus musculus]	Heat shock protein 90kDa alpha (cytosolic), class B member 1; Molecular chaperone that promotes the maturation, structural maintenance and proper regulation of specific target proteins involved for instance in cell cycle control and signal transduction. Undergoes a functional cycle that is linked to its ATPase activity. This cycle probably induces conformational changes in the client proteins, th…
			Eno3	KO > WT	0.196	0.222	PREDICTED: alpha-enolase isoform X1 [Mus musculus]; gamma-enolase isoform 2 [Mus musculus]; PREDICTED: beta-enolase isoform X2 [Mus musculus]; PREDICTED: gamma-enolase isoform X1 [Mus musculus]; PREDICTED: alpha-enolase isoform X2 [Mus musculus]; PREDICTED: beta-enolase isoform X1 [Mus musculus]	2-phospho-D-glycerate hydro-lyase; Appears to have a function in striated muscle development and regeneration; Belongs to the enolase family.
			Myom1	KO < WT	0.198	-0.34	myomesin-1 isoform 1 [Mus musculus]; myomesin-1 isoform 2 [Mus musculus]	190 kDa connectin-associated protein; Major component of the vertebrate myofibrillar M band. Binds myosin, titin, and light meromyosin. This binding is dose dependent; Fibronectin type III domain containing
Yes? Zhong 2005)		YES	Flna	KO < WT	0.199	-0.281	PREDICTED: filamin-A isoform X1 [Mus musculus]; PREDICTED: filamin-A isoform X2 [Mus musculus]; PREDICTED: filamin-A isoform X3 [Mus musculus]	Endothelial actin-binding protein; Promotes orthogonal branching of actin filaments and links actin filaments to membrane glycoproteins. Anchors various transmembrane proteins to the actin cytoskeleton and serves as a scaffold for a wide range of cytoplasmic signaling proteins. Interaction with FLNA may allow neuroblast migration from the ventricular zone into the cortical plate. Tethers cell sur…
			Ldhb	KO < WT	0.199	-0.237	PREDICTED: L-lactate dehydrogenase C chain isoform X1 [Mus musculus]; L-lactate dehydrogenase B chain isoform Ldhbx [Mus musculus]; L-lactate dehydrogenase B chain isoform 2 [Mus musculus]; L-lactate dehydrogenase A chain isoform 2 [Mus musculus]; L-lactate dehydrogenase B chain isoform Ldhb [Mus musculus]; L-lactate dehydrogenase A chain isoform 1 [Mus musculus]	Renal carcinoma antigen NY-REN-46; Lactate dehydrogenase B; Belongs to the LDH/MDH superfamily. LDH family.
		YES	Myh10	KO > WT	0.199	0.31	PREDICTED: myosin-14 isoform X1 [Mus musculus]; myosin-11 isoform 1 [Mus musculus]; PREDICTED: myosin-10 isoform X2 [Mus musculus]; PREDICTED: myosin-11 isoform X1 [Mus musculus]; PREDICTED: myosin-10 isoform X3 [Mus musculus]; PREDICTED: myosin-10 isoform X1 [Mus musculus]; myosin-9 [Mus musculus]; PREDICTED: myosin-11 isoform X2 [Mus musculus]; PREDICTED: myosin-14 isoform X2 [Mus musculus]; my…	Cellular myosin heavy chain, type B; Cellular myosin that appears to play a role in cytokinesis, cell shape, and specialized functions such as secretion and capping. Involved with LARP6 in the stabilization of type I collagen mRNAs for CO1A1 and CO1A2. During cell spreading, plays an important role in cytoskeleton reorganization, focal contacts formation (in the central part but not the margins o…
YES (Dittmer 2013)			Tuba1b	KO < WT	0.2	-0.147	tubulin alpha-3 chain [Mus musculus]; PREDICTED: tubulin alpha-1B chain isoform X1 [Mus musculus]; tubulin alpha-1A chain [Mus musculus]; tubulin alpha-1B chain [Mus musculus]; tubulin alpha-1C chain [Mus musculus]	Tubulin alpha-ubiquitous chain; Tubulin is the major constituent of microtubules. It binds two moles of GTP, one at an exchangeable site on the beta chain and one at a non-exchangeable site on the alpha chain; Tubulins
			Ccdc141	KO < WT	0.2	-0.32	PREDICTED: coiled-coil domain-containing protein 141 isoform X4 [Mus musculus]; PREDICTED: coiled-coil domain-containing protein 141 isoform X3 [Mus musculus]; PREDICTED: coiled-coil domain-containing protein 141 isoform X2 [Mus musculus]; PREDICTED: coiled-coil domain-containing protein 141 isoform X1 [Mus musculus]	Coiled-coil protein associated with myosin II and DISC1; Plays a critical role in radial migration and centrosomal function; Immunoglobulin like domain containing
			Tuba8	KO > WT	0.201	0.225	tubulin alpha-8 chain [Mus musculus]	Tubulin alpha chain-like 2; Tubulin is the major constituent of microtubules. It binds two moles of GTP, one at an exchangeable site on the beta chain and one at a non-exchangeable site on the alpha chain; Tubulins
YES (Dittmer 2013)		YES	Lmnb1	KO > WT	0.202	0.512	lamin-B1 [Mus musculus]	Lamin B1; Lamins are components of the nuclear lamina, a fibrous layer on the nucleoplasmic side of the inner nuclear membrane, which is thought to provide a framework for the nuclear envelope and may also interact with chromatin.
			Hk1	KO > WT	0.202	0.36	PREDICTED: hexokinase-1 isoform X4 [Mus musculus]; PREDICTED: hexokinase-1 isoform X3 [Mus musculus]; PREDICTED: hexokinase-1 isoform X1 [Mus musculus]; hexokinase-1 isoform HK1-sb [Mus musculus]; PREDICTED: hexokinase-1 isoform X2 [Mus musculus]; hexokinase-1 isoform HK1 [Mus musculus]	Brain form hexokinase; Hexokinase 1
			Tcap	KO > WT	0.203	0.438	telethonin [Mus musculus]	Titin cap protein; Muscle assembly regulating factor. Mediates the antiparallel assembly of titin (TTN) molecules at the sarcomeric Z-disk.
			Atp1a1	KO < WT	0.203	-0.173	sodium/potassium-transporting ATPase subunit alpha-1 precursor [Mus musculus]	Sodium/potassium-transporting ATPase subunit alpha-1; This is the catalytic component of the active enzyme, which catalyzes the hydrolysis of ATP coupled with the exchange of sodium and potassium ions across the plasma membrane. This action creates the electrochemical gradient of sodium and potassium ions, providing the energy for active transport of various nutrients; ATPase Na+/K+ transporting …
			Abra	KO > WT	0.21	0.52	actin-binding Rho-activating protein [Mus musculus]	Striated muscle activator of Rho-dependent signaling; Acts as an activator of serum response factor (SRF)- dependent transcription possibly by inducing nuclear translocation of MKL1 or MKL2 and through a mechanism requiring Rho-actin signaling.
		YES	Phf5a	KO > WT	0.219	1.21	PHD finger-like domain-containing protein 5A [Mus musculus]	PHD finger-like domain-containing protein 5A; Involved with the PAF1 complex (PAF1C) in transcriptional elongation by RNA polymerase II, and in regulation of development and maintenance of embryonic stem cell (ESC) pluripotency. Required for maintenance of ESCs self-renewal and cellular reprogramming of stem cells. Maintains pluripotency by recruiting and stabilizing PAF1C on pluripotency genes l…
			Prosc	KO > WT	0.22	0.586	pyridoxal phosphate homeostasis protein isoform a [Mus musculus]; pyridoxal phosphate homeostasis protein isoform c [Mus musculus]; PREDICTED: proline synthase co-transcribed bacterial homolog protein isoform X3 [Mus musculus]; pyridoxal phosphate homeostasis protein isoform b [Mus musculus]	Proline synthase co-transcribed bacterial homolog protein; Pyridoxal 5'-phosphate (PLP)-binding protein, which may be involved in intracellular homeostatic regulation of pyridoxal 5'-phosphate (PLP), the active form of vitamin B6.
YES (Dittmer 2013)		YES	Lmna	KO > WT	0.224	0.605	PREDICTED: prelamin-A/C isoform X1 [Mus musculus]; lamin-B1 [Mus musculus]; prelamin-A/C isoform C [Mus musculus]; lamin-B2 isoform 2 [Mus musculus]; prelamin-A/C isoform C2 [Mus musculus]; lamin-B2 isoform 1 [Mus musculus]	Prelamin-A/C; Lamins are components of the nuclear lamina, a fibrous layer on the nucleoplasmic side of the inner nuclear membrane, which is thought to provide a framework for the nuclear envelope and may also interact with chromatin. Lamin A and C are present in equal amounts in the lamina of mammals. Plays an important role in nuclear assembly, chromatin organization, nuclear membrane and telom…
		YES	Sorbs2	KO < WT	0.224	-0.354	PREDICTED: sorbin and SH3 domain-containing protein 2 isoform X7 [Mus musculus]; PREDICTED: sorbin and SH3 domain-containing protein 2 isoform X14 [Mus musculus]; PREDICTED: sorbin and SH3 domain-containing protein 2 isoform X18 [Mus musculus]; PREDICTED: sorbin and SH3 domain-containing protein 2 isoform X5 [Mus musculus]; PREDICTED: sorbin and SH3 domain-containing protein 2 isoform X17 [Mus mu…	Sorbin and SH3 domain-containing protein 2; Adapter protein that plays a role in the assembling of signaling complexes, being a link between ABL kinases and actin cytoskeleton. Can form complex with ABL1 and CBL, thus promoting ubiquitination and degradation of ABL1 or with AKT1 and PAK1, thus mediating AKT1-mediated activation of PAK1. May play a role in the regulation of pancreatic cell adhesio…
			Etv3l	KO > WT	0.228	0.418	PREDICTED: ETS translocation variant 3-like protein [Mus musculus]	ETS translocation variant 3-like protein; Transcriptional regulator; ETS transcription factor family
			Myh6	KO < WT	0.239	-0.188	PREDICTED: myosin-6 isoform X1 [Mus musculus]; PREDICTED: myosin-1 isoform X1 [Mus musculus]; myosin-4 [Mus musculus]; myosin-2 [Mus musculus]; myosin-6 [Mus musculus]; myosin-13 [Mus musculus]; PREDICTED: myosin-7 isoform X1 [Mus musculus]; myosin-8 [Mus musculus]	Myosin heavy chain, cardiac muscle alpha isoform; Muscle contraction; Belongs to the TRAFAC class myosin-kinesin ATPase superfamily. Myosin family.
			Tuba8	KO < WT	0.239	-0.224	tubulin alpha-3 chain [Mus musculus]; tubulin alpha-8 chain [Mus musculus]; PREDICTED: tubulin alpha-1B chain isoform X1 [Mus musculus]; tubulin alpha-1A chain [Mus musculus]; PREDICTED: tubulin alpha-4A chain isoform X1 [Mus musculus]; tubulin alpha-1B chain [Mus musculus]; tubulin alpha-1C chain [Mus musculus]; tubulin alpha-4A chain isoform 1 [Mus musculus]	Tubulin alpha chain-like 2; Tubulin is the major constituent of microtubules. It binds two moles of GTP, one at an exchangeable site on the beta chain and one at a non-exchangeable site on the alpha chain; Tubulins
		YES	H1f0	KO < WT	0.24	-0.449	histone H1.0 [Mus musculus]	H1 histone family, member 0; Histones H1 are necessary for the condensation of nucleosome chains into higher-order structures. The H1F0 histones are found in cells that are in terminal stages of differentiation or that have low rates of cell division.
		YES	Perm1	KO < WT	0.241	-0.181	PREDICTED: PGC-1 and ERR-induced regulator in muscle protein 1 isoform X1 [Mus musculus]	PGC-1 and ERR-induced regulator in muscle protein 1; Regulates the expression of selective PPARGC1A/B and ESRRA/B/G target genes with roles in glucose and lipid metabolism, energy transfer, contractile function, muscle mitochondrial biogenesis and oxidative capacity. Required for the efficient induction of MT-CO2, MT-CO3, COX4I1, TFB1M, TFB2M, POLRMT and SIRT3 by PPARGC1A. Positively regulates th…
		YES	Mypn	KO < WT	0.245	-15.1	myopalladin [Mus musculus]	145 kDa sarcomeric protein; Component of the sarcomere that tethers together nebulin (skeletal muscle) and nebulette (cardiac muscle) to alpha-actinin, at the Z lines; Belongs to the myotilin/palladin family.
			Plec	KO < WT	0.245	-0.368	plectin isoform 1c [Mus musculus]; plectin isoform 1f [Mus musculus]; plectin isoform 1b [Mus musculus]; plectin isoform 1g [Mus musculus]; plectin isoform 1e [Mus musculus]; plectin isoform 1a [Mus musculus]; plectin isoform 1 [Mus musculus]; plectin isoform 1d [Mus musculus]; plectin isoform 1hij [Mus musculus]; plectin isoform 1b2alpha [Mus musculus]; plectin isoform 12alpha [Mus musculus]; pl…	Hemidesmosomal protein 1; Interlinks intermediate filaments with microtubules and microfilaments and anchors intermediate filaments to desmosomes or hemidesmosomes. Could also bind muscle proteins such as actin to membrane complexes in muscle. May be involved not only in the filaments network, but also in the regulation of their dynamics. Structural component of muscle. Isoform 9 plays a major ro…
		YES	Des	KO < WT	0.247	-0.583	desmin [Mus musculus]	Desmin; Muscle-specific type III intermediate filament essential for proper muscular structure and function. Plays a crucial role in maintaining the structure of sarcomeres, inter-connecting the Z-disks and forming the myofibrils, linking them not only to the sarcolemmal cytoskeleton, but also to the nucleus and mitochondria, thus providing strength for the muscle fiber during activity. In adult …
			Wdsub1	KO < WT	0.248	-0.238	PREDICTED: WD repeat, SAM and U-box domain-containing protein 1 isoform X2 [Mus musculus]; PREDICTED: WD repeat, SAM and U-box domain-containing protein 1 isoform X4 [Mus musculus]; PREDICTED: WD repeat, SAM and U-box domain-containing protein 1 isoform X1 [Mus musculus]; WD repeat, SAM and U-box domain-containing protein 1 isoform 2 [Mus musculus]	WD repeat, sterile alpha motif and U-box domain containing 1
YES (Dittmer 2013)		YES	Lmna	KO > WT	0.25	0.565	PREDICTED: prelamin-A/C isoform X1 [Mus musculus]; prelamin-A/C isoform C [Mus musculus]	Prelamin-A/C; Lamins are components of the nuclear lamina, a fibrous layer on the nucleoplasmic side of the inner nuclear membrane, which is thought to provide a framework for the nuclear envelope and may also interact with chromatin. Lamin A and C are present in equal amounts in the lamina of mammals. Plays an important role in nuclear assembly, chromatin organization, nuclear membrane and telom…
		YES	Jup	KO > WT	0.256	0.56	PREDICTED: junction plakoglobin isoform X1 [Mus musculus]	Junction plakoglobin; Common junctional plaque protein. The membrane- associated plaques are architectural elements in an important strategic position to influence the arrangement and function of both the cytoskeleton and the cells within the tissue. The presence of plakoglobin in both the desmosomes and in the intermediate junctions suggests that it plays a central role in the structure and func…
			Vps11	KO > WT	0.256	0.56	PREDICTED: vacuolar protein sorting-associated protein 11 homolog isoform X1 [Mus musculus]; vacuolar protein sorting-associated protein 11 homolog [Mus musculus]; PREDICTED: vacuolar protein sorting-associated protein 11 homolog isoform X2 [Mus musculus]	Vacuolar protein sorting-associated protein 11 homolog; Plays a role in vesicle-mediated protein trafficking to lysosomal compartments including the endocytic membrane transport and autophagic pathways. Believed to act as a core component of the putative HOPS and CORVET endosomal tethering complexes which are proposed to be involved in the Rab5-to-Rab7 endosome conversion probably implicating MON…
			Ybx1	KO > WT	0.256	0.56	nuclease-sensitive element-binding protein 1 [Mus musculus]; PREDICTED: nuclease-sensitive element-binding protein 1 isoform X1 [Mus musculus]; PREDICTED: nuclease-sensitive element-binding protein 1 isoform X2 [Mus musculus]	CCAAT-binding transcription factor I subunit A; Mediates pre-mRNA alternative splicing regulation. Binds to splice sites in pre-mRNA and regulates splice site selection. Binds and stabilizes cytoplasmic mRNA. Contributes to the regulation of translation by modulating the interaction between the mRNA and eukaryotic initiation factors (By similarity). Regulates the transcription of numerous genes. …
			C3	KO > WT	0.256	0.411	complement C3 preproprotein [Mus musculus]; PREDICTED: complement C3 isoform X1 [Mus musculus]	C3 and PZP-like alpha-2-macroglobulin domain-containing protein 1; C3 plays a central role in the activation of the complement system. Its processing by C3 convertase is the central reaction in both classical and alternative complement pathways. After activation C3b can bind covalently, via its reactive thioester, to cell surface carbohydrates or immune aggregates; C3 and PZP like, alpha-2-macrog…
			Spta1	KO > WT	0.258	0.191	spectrin alpha chain, erythrocytic 1 [Mus musculus]	Spectrin alpha chain, erythrocytic 1; Spectrin is the major constituent of the cytoskeletal network underlying the erythrocyte plasma membrane. It associates with band 4.1 and actin to form the cytoskeletal superstructure of the erythrocyte plasma membrane; EF-hand domain containing
YES (Zastrow 2006)		YES	Ttn	KO < WT	0.259	-0.372	PREDICTED: titin isoform X1 [Mus musculus]; titin isoform N2-A [Mus musculus]; titin isoform N2-B [Mus musculus]; PREDICTED: titin isoform X2 [Mus musculus]	Rhabdomyosarcoma antigen MU-RMS-40.14; Key component in the assembly and functioning of vertebrate striated muscles. By providing connections at the level of individual microfilaments, it contributes to the fine balance of forces between the two halves of the sarcomere. The size and extensibility of the cross-links are the main determinants of sarcomere extensibility properties of muscle. In non-…
		YES	Clint1	KO < WT	0.261	-0.356	clathrin interactor 1 isoform 1 [Mus musculus]; clathrin interactor 1 isoform 2 [Mus musculus]; PREDICTED: clathrin interactor 1 isoform X3 [Mus musculus]; PREDICTED: clathrin interactor 1 isoform X2 [Mus musculus]	Clathrin-interacting protein localized in the trans-Golgi region; Binds to membranes enriched in phosphatidylinositol 4,5- bisphosphate (PtdIns(4,5)P2). May have a role in transport via clathrin-coated vesicles from the trans-Golgi network to endosomes. Stimulates clathrin assembly.
YES (Dittmer 2013)		YES	Lmnb2	KO > WT	0.265	0.513	lamin-B2 isoform 2 [Mus musculus]; lamin-B2 isoform 1 [Mus musculus]	Lamin B2; Lamins are components of the nuclear lamina, a fibrous layer on the nucleoplasmic side of the inner nuclear membrane, which is thought to provide a framework for the nuclear envelope and may also interact with chromatin; Belongs to the intermediate filament family.
		YES	HIST1H1C	KO < WT	0.27	-0.478	histone H1.2 [Mus musculus]; histone H1.3 [Mus musculus]	Histone cluster 1, H1c; Histone H1 protein binds to linker DNA between nucleosomes forming the macromolecular structure known as the chromatin fiber. Histones H1 are necessary for the condensation of nucleosome chains into higher-order structured fibers. Acts also as a regulator of individual gene transcription through chromatin remodeling, nucleosome spacing and DNA methylation (By similarity).
			Myh6	KO < WT	0.273	-0.143	PREDICTED: myosin-6 isoform X1 [Mus musculus]; myosin-6 [Mus musculus]	Myosin heavy chain, cardiac muscle alpha isoform; Muscle contraction; Belongs to the TRAFAC class myosin-kinesin ATPase superfamily. Myosin family.
		YES	Pdlim5	KO < WT	0.273	-0.347	PREDICTED: PDZ and LIM domain protein 5 isoform X9 [Mus musculus]; PREDICTED: PDZ and LIM domain protein 5 isoform X7 [Mus musculus]; PREDICTED: PDZ and LIM domain protein 5 isoform X12 [Mus musculus]; PREDICTED: PDZ and LIM domain protein 5 isoform X4 [Mus musculus]; PREDICTED: PDZ and LIM domain protein 5 isoform X1 [Mus musculus]; PREDICTED: PDZ and LIM domain protein 5 isoform X5 [Mus musculu…	Enigma-like PDZ and LIM domains protein; May play an important role in the heart development by scaffolding PKC to the Z-disk region. May play a role in the regulation of cardiomyocyte expansion. Overexpression promotes the development of heart hypertrophy. Contributes to the regulation of dendritic spine morphogenesis in neurons. May restrain postsynaptic growth of excitatory synapses (By simila…
		YES	Mvp	KO < WT	0.285	-0.644	PREDICTED: major vault protein isoform X1 [Mus musculus]; major vault protein [Mus musculus]	Lung resistance-related protein; Required for normal vault structure. Vaults are multi- subunit structures that may act as scaffolds for proteins involved in signal transduction. Vaults may also play a role in nucleo- cytoplasmic transport. Down-regulates IFNG-mediated STAT1 signaling and subsequent activation of JAK. Down-regulates SRC activity and signaling through MAP kinases.
YES (Zastrow 2006)		YES	TTN	KO < WT	0.288	-0.455	PREDICTED: titin isoform X1 [Mus musculus]; titin isoform N2-B [Mus musculus]; PREDICTED: titin isoform X2 [Mus musculus]	Rhabdomyosarcoma antigen MU-RMS-40.14; Key component in the assembly and functioning of vertebrate striated muscles. By providing connections at the level of individual microfilaments, it contributes to the fine balance of forces between the two halves of the sarcomere. The size and extensibility of the cross-links are the main determinants of sarcomere extensibility properties of muscle. In non-…
		YES	Epb41	KO > WT	0.293	0.18	PREDICTED: band 4.1-like protein 3 isoform X37 [Mus musculus]; PREDICTED: band 4.1-like protein 3 isoform X30 [Mus musculus]; PREDICTED: band 4.1-like protein 3 isoform X10 [Mus musculus]; PREDICTED: protein 4.1 isoform X1 [Mus musculus]; PREDICTED: band 4.1-like protein 3 isoform X38 [Mus musculus]; PREDICTED: band 4.1-like protein 3 isoform X6 [Mus musculus]; PREDICTED: band 4.1-like protein 3 …	Erythrocyte membrane protein band 4.1; Protein 4.1 is a major structural element of the erythrocyte membrane skeleton. It plays a key role in regulating membrane physical properties of mechanical stability and deformability by stabilizing spectrin-actin interaction. Recruits DLG1 to membranes. Required for dynein-dynactin complex and NUMA1 recruitment at the mitotic cell cortex during anaphase.
			Hba-a2	KO > WT	0.294	0.337	hemoglobin alpha, adult chain 2 [Mus musculus]
			Mylk3	KO < WT	0.295	-0.191	PREDICTED: myosin light chain kinase 3 isoform X1 [Mus musculus]; myosin light chain kinase 3 isoform 2 [Mus musculus]; myosin light chain kinase 3 isoform 1 [Mus musculus]	Cardiac-MyBP-C-associated Ca/CaM kinase; Kinase that phosphorylates MYL2 in vitro. Promotes sarcomere formation in cardiomyocytes and increases cardiomyocyte contractility (By similarity).
		YES	Nav3	KO < WT	0.297	-0.508	PREDICTED: neuron navigator 3 isoform X7 [Mus musculus]; PREDICTED: neuron navigator 3 isoform X1 [Mus musculus]; PREDICTED: neuron navigator 3 isoform X4 [Mus musculus]; PREDICTED: neuron navigator 3 isoform X2 [Mus musculus]; PREDICTED: neuron navigator 3 isoform X9 [Mus musculus]; PREDICTED: neuron navigator 3 isoform X3 [Mus musculus]; PREDICTED: neuron navigator 3 isoform X11 [Mus musculus];…	Pore membrane and/or filament-interacting-like protein 1; May regulate IL2 production by T-cells. May be involved in neuron regeneration; Belongs to the Nav/unc-53 family.
			Mdh1	KO < WT	0.298	-0.199	malate dehydrogenase, cytoplasmic isoform Mdh1 [Mus musculus]; malate dehydrogenase, peroxisomal isoform Mdh1x [Mus musculus]	Malate dehydrogenase 1, NAD (soluble); Malate dehydrogenase 1; Belongs to the LDH/MDH superfamily. MDH type 2 family.
			Myh6	KO < WT	0.298	-0.174	PREDICTED: myosin-6 isoform X1 [Mus musculus]; PREDICTED: myosin-1 isoform X1 [Mus musculus]; PREDICTED: myosin-3 isoform X1 [Mus musculus]; myosin-4 [Mus musculus]; myosin-2 [Mus musculus]; myosin-6 [Mus musculus]; myosin-13 [Mus musculus]; PREDICTED: myosin-7 isoform X1 [Mus musculus]; myosin-8 [Mus musculus]	Myosin heavy chain, cardiac muscle alpha isoform; Muscle contraction; Belongs to the TRAFAC class myosin-kinesin ATPase superfamily. Myosin family.
			Fam210a	KO > WT	0.301	0.12	PREDICTED: protein FAM210A isoform X1 [Mus musculus]	Family with sequence similarity 210 member A; Belongs to the FAM210 family.
YES (Dittmer 2013)			Tuba1b	KO < WT	0.307	-0.167	tubulin alpha-3 chain [Mus musculus]; tubulin alpha-4A chain isoform 3 [Mus musculus]; PREDICTED: tubulin alpha-1B chain isoform X1 [Mus musculus]; tubulin alpha-1A chain [Mus musculus]; PREDICTED: tubulin alpha-4A chain isoform X1 [Mus musculus]; tubulin alpha-1B chain [Mus musculus]; tubulin alpha-1C chain [Mus musculus]; tubulin alpha-4A chain isoform 1 [Mus musculus]	Tubulin alpha-ubiquitous chain; Tubulin is the major constituent of microtubules. It binds two moles of GTP, one at an exchangeable site on the beta chain and one at a non-exchangeable site on the alpha chain; Tubulins
			Actr1a	KO > WT	0.31	0.169	alpha-centractin [Mus musculus]	ARP1 actin-related protein 1 homolog A, centractin alpha (yeast); Component of a multi-subunit complex involved in microtubule based vesicle motility. It is associated with the centrosome; Actin related proteins
			Bcl2l13	KO > WT	0.311	4.15	PREDICTED: bcl-2-like protein 13 isoform X1 [Mus musculus]; bcl-2-like protein 13 [Mus musculus]; PREDICTED: bcl-2-like protein 13 isoform X2 [Mus musculus]	BCL2-like 13 (apoptosis facilitator); May promote the activation of caspase-3 and apoptosis; BCL2 family
			Insrr	KO > WT	0.315	0.456	PREDICTED: insulin receptor-related protein isoform X3 [Mus musculus]; PREDICTED: insulin receptor-related protein isoform X1 [Mus musculus]; insulin receptor-related protein precursor [Mus musculus]; PREDICTED: insulin receptor-related protein isoform X4 [Mus musculus]	Insulin receptor-related receptor; Receptor with tyrosine-protein kinase activity. Functions as a pH sensing receptor which is activated by increased extracellular pH. Activates an intracellular signaling pathway that involves IRS1 and AKT1/PKB.
		YES	Ppp2ca	KO > WT	0.317	4.17	serine/threonine-protein phosphatase 2A catalytic subunit alpha isoform [Mus musculus]	Serine/threonine-protein phosphatase 2A catalytic subunit alpha isoform; PP2A is the major phosphatase for microtubule-associated proteins (MAPs). PP2A can modulate the activity of phosphorylase B kinase casein kinase 2, mitogen-stimulated S6 kinase, and MAP-2 kinase. Cooperates with SGO2 to protect centromeric cohesin from separase-mediated cleavage in oocytes specifically during meiosis I (By s…
		YES	Psmd14	KO > WT	0.317	0.154	26S proteasome non-ATPase regulatory subunit 14 [Mus musculus]	Proteasome (prosome, macropain) 26S subunit, non-ATPase, 14; Component of the 26S proteasome, a multiprotein complex involved in the ATP-dependent degradation of ubiquitinated proteins. This complex plays a key role in the maintenance of protein homeostasis by removing misfolded or damaged proteins, which could impair cellular functions, and by removing proteins whose functions are no longer requ…
		YES	Sod1	KO < WT	0.321	-0.197	superoxide dismutase [Cu-Zn] [Mus musculus]	Superoxide dismutase 1, soluble; Destroys radicals which are normally produced within the cells and which are toxic to biological systems.
		YES	Fhl2	KO > WT	0.321	4.3	PREDICTED: four and a half LIM domains protein 2 isoform X1 [Mus musculus]	Four and a half LIM domains protein 2; May function as a molecular transmitter linking various signaling pathways to transcriptional regulation. Negatively regulates the transcriptional repressor E4F1 and may function in cell growth. Inhibits the transcriptional activity of FOXO1 and its apoptotic function by enhancing the interaction of FOXO1 with SIRT1 and FOXO1 deacetylation; LIM domain contai…
		YES	Prdm2	KO < WT	0.322	-0.231	PREDICTED: PR domain zinc finger protein 2 isoform X3 [Mus musculus]; PREDICTED: PR domain zinc finger protein 2 isoform X1 [Mus musculus]; PREDICTED: PR domain zinc finger protein 2 isoform X5 [Mus musculus]; PREDICTED: PR domain zinc finger protein 2 isoform X2 [Mus musculus]; PREDICTED: PR domain zinc finger protein 2 isoform X4 [Mus musculus]; PR domain zinc finger protein 2 isoform b [Mus mu…	Retinoblastoma protein-interacting zinc finger protein; S-adenosyl-L-methionine-dependent histone methyltransferase that specifically methylates 'Lys-9' of histone H3. May function as a DNA-binding transcription factor. Binds to the macrophage-specific TPA-responsive element (MTE) of the HMOX1 (heme oxygenase 1) gene and may act as a transcriptional activator of this gene; Belongs to the class V-…
			Zfp329	KO < WT	0.325	-0.532	PREDICTED: zinc finger protein 329 isoform X2 [Mus musculus]; PREDICTED: zinc finger protein 329 isoform X1 [Mus musculus]; zinc finger protein 329 [Mus musculus]
		YES	Lama5	KO < WT	0.327	-4	laminin subunit alpha-5 precursor [Mus musculus]; PREDICTED: laminin subunit alpha-5 isoform X3 [Mus musculus]; PREDICTED: laminin subunit alpha-5 isoform X1 [Mus musculus]; PREDICTED: laminin subunit alpha-5 isoform X2 [Mus musculus]	Laminin-10 subunit alpha; Binding to cells via a high affinity receptor, laminin is thought to mediate the attachment, migration and organization of cells into tissues during embryonic development by interacting with other extracellular matrix components.
		YES	Nampt	KO < WT	0.33	-0.14	nicotinamide phosphoribosyltransferase [Mus musculus]	Nicotinamide phosphoribosyltransferase; Catalyzes the condensation of nicotinamide with 5- phosphoribosyl-1-pyrophosphate to yield nicotinamide mononucleotide, an intermediate in the biosynthesis of NAD. It is the rate limiting component in the mammalian NAD biosynthesis pathway. The secreted form behaves both as a cytokine with immunomodulating properties and an adipokine with anti-diabetic prop…
			Myl7	KO > WT	0.33	0.422	myosin regulatory light chain 2, atrial isoform [Mus musculus]	Myosin regulatory light chain 2, atrial isoform; EF-hand domain containing
			Gsdma	KO > WT	0.332	0.244	PREDICTED: gasdermin-A isoform X1 [Mus musculus]; gasdermin-A [Mus musculus]	Gasdermin A; May promote pyroptosis (Probable). Upon cleavage in vitro of genetically engineered GSDMA, the released N-terminal moiety binds to some types of lipids, such as possibly phosphatidylinositol (4,5)-bisphosphate. Homooligomerizes within the membrane and forms pores of 10 -15 nanometers (nm) of inner diameter, triggering cell death. Also binds to bacterial and mitochondrial lipids, incl…
			Xirp1	KO < WT	0.336	-0.382	PREDICTED: xin actin-binding repeat-containing protein 1 isoform X1 [Mus musculus]	Xin actin-binding repeat-containing protein 1; Protects actin filaments from depolymerization; Belongs to the Xin family.
			Plin4	KO > WT	0.343	0.354	PREDICTED: perilipin-4 isoform X7 [Mus musculus]; PREDICTED: perilipin-4 isoform X6 [Mus musculus]; PREDICTED: perilipin-4 isoform X5 [Mus musculus]; PREDICTED: perilipin-4 isoform X1 [Mus musculus]; PREDICTED: perilipin-4 isoform X8 [Mus musculus]; PREDICTED: perilipin-4 isoform X4 [Mus musculus]; PREDICTED: perilipin-4 isoform X2 [Mus musculus]; PREDICTED: perilipin-4 isoform X3 [Mus musculus];…	Adipocyte protein S3-12; May play a role in triacylglycerol packaging into adipocytes. May function as a coat protein involved in the biogenesis of lipid droplets (By similarity); Belongs to the perilipin family.
			Synm	KO > WT	0.349	7.79	synemin isoform L [Mus musculus]; synemin isoform M [Mus musculus]; synemin isoform H [Mus musculus]	Synemin, intermediate filament protein; Type-VI intermediate filament (IF) which plays an important cytoskeletal role within the muscle cell cytoskeleton. It forms heteropolymeric IFs with desmin and/or vimentin, and via its interaction with cytoskeletal proteins alpha-dystrobrevin, dystrophin, talin-1, utrophin and vinculin, is able to link these heteropolymeric IFs to adherens-type junctions, s…
		YES	Anxa2	KO > WT	0.35	0.263	PREDICTED: annexin A2 isoform X1 [Mus musculus]	Placental anticoagulant protein IV; Calcium-regulated membrane-binding protein whose affinity for calcium is greatly enhanced by anionic phospholipids. It binds two calcium ions with high affinity. May be involved in heat-stress response. Inhibits PCSK9-enhanced LDLR degradation, probably reduces PCSK9 protein levels via a translational mechanism but also competes with LDLR for binding with PCSK9…
YES (Roux 2012)		YES	Fhl1	KO < WT	0.351	-0.26	PREDICTED: four and a half LIM domains protein 1 isoform X2 [Mus musculus]; PREDICTED: four and a half LIM domains protein 1 isoform X5 [Mus musculus]; PREDICTED: four and a half LIM domains protein 1 isoform X3 [Mus musculus]; PREDICTED: four and a half LIM domains protein 1 isoform X4 [Mus musculus]; PREDICTED: four and a half LIM domains protein 1 isoform X6 [Mus musculus]; four and a half LIM…	Four and a half LIM domains protein 1; May have an involvement in muscle development or hypertrophy; LIM domain containing
			Myh6	KO < WT	0.353	-0.133	PREDICTED: myosin-6 isoform X1 [Mus musculus]; myosin-6 [Mus musculus]; PREDICTED: myosin-7 isoform X1 [Mus musculus]	Myosin heavy chain, cardiac muscle alpha isoform; Muscle contraction; Belongs to the TRAFAC class myosin-kinesin ATPase superfamily. Myosin family.
			Myom2	KO < WT	0.354	-0.0806	PREDICTED: myomesin-2 isoform X1 [Mus musculus]; PREDICTED: myomesin-2 isoform X2 [Mus musculus]	165 kDa connectin-associated protein; Major component of the vertebrate myofibrillar M band. Binds myosin, titin, and light meromyosin. This binding is dose dependent; Fibronectin type III domain containing
			C1orf87	KO < WT	0.355	-0.263	PREDICTED: uncharacterized protein C1orf87 homolog isoform X1 [Mus musculus]	Chromosome 1 open reading frame 87
			Lamb2	KO > WT	0.355	3.86	PREDICTED: laminin subunit beta-2 isoform X1 [Mus musculus]	Laminin, beta 2 (laminin S); Binding to cells via a high affinity receptor, laminin is thought to mediate the attachment, migration and organization of cells into tissues during embryonic development by interacting with other extracellular matrix components.
		YES	Eef1a1	KO < WT	0.356	-0.163	elongation factor 1-alpha 1 [Mus musculus]	Eukaryotic translation elongation factor 1 alpha 1; This protein promotes the GTP-dependent binding of aminoacyl-tRNA to the A-site of ribosomes during protein biosynthesis. With PARP1 and TXK, forms a complex that acts as a T helper 1 (Th1) cell-specific transcription factor and binds the promoter of IFN-gamma to directly regulate its transcription, and is thus involved importantly in Th1 cytoki…
			Immt	KO > WT	0.36	0.195	PREDICTED: MICOS complex subunit Mic60 isoform X1 [Mus musculus]; MICOS complex subunit Mic60 isoform 3 [Mus musculus]; PREDICTED: MICOS complex subunit Mic60 isoform X3 [Mus musculus]; MICOS complex subunit Mic60 isoform 1 [Mus musculus]; MICOS complex subunit Mic60 isoform 6 [Mus musculus]; MICOS complex subunit Mic60 isoform 2 [Mus musculus]; PREDICTED: MICOS complex subunit Mic60 isoform X5 […	Cell proliferation-inducing gene 4/52 protein; Component of the MICOS complex, a large protein complex of the mitochondrial inner membrane that plays crucial roles in the maintenance of crista junctions, inner membrane architecture, and formation of contact sites to the outer membrane. Plays an important role in the maintenance of the MICOS complex stability and the mitochondrial cristae morpholo…
			Dnaja4	KO > WT	0.361	7.67	dnaJ homolog subfamily A member 4 [Mus musculus]; PREDICTED: dnaJ homolog subfamily A member 4 isoform X1 [Mus musculus]	DnaJ (Hsp40) homolog, subfamily A, member 4; DnaJ heat shock protein family member A4
			Flnc	KO < WT	0.361	-0.283	filamin-C isoform 2 [Mus musculus]; filamin-C isoform 1 [Mus musculus]	Actin-binding-like protein; Muscle-specific filamin, which plays a central role in muscle cells, probably by functioning as a large actin-cross- linking protein. May be involved in reorganizing the actin cytoskeleton in response to signaling events, and may also display structural functions at the Z lines in muscle cells. Critical for normal myogenesis and for maintaining the structural integrity…
			Rasal3	KO < WT	0.366	-0.25	PREDICTED: RAS protein activator like-3 isoform X3 [Mus musculus]; PREDICTED: RAS protein activator like-3 isoform X1 [Mus musculus]; RAS protein activator like-3 isoform 1 [Mus musculus]; RAS protein activator like-3 isoform 2 [Mus musculus]	RAS protein activator like 3; Functions as a Ras GTPase-activating protein. Plays an important role in the expansion and functions of natural killer T (NKT) cells in the liver by negatively regulating RAS activity and the down-stream ERK signaling pathway; C2 and RasGAP domain containing
			Myh7b	KO < WT	0.366	-0.275	PREDICTED: myosin-7B isoform X4 [Mus musculus]; PREDICTED: myosin-7B isoform X2 [Mus musculus]; PREDICTED: myosin-7B isoform X1 [Mus musculus]; PREDICTED: myosin-7B isoform X5 [Mus musculus]; PREDICTED: myosin-7B isoform X6 [Mus musculus]; PREDICTED: myosin-7B isoform X3 [Mus musculus]; myosin-7B [Mus musculus]	Myosin heavy chain 7B, cardiac muscle beta isoform; Involved in muscle contraction; Myosin heavy chains
			Ldb3	KO < WT	0.37	-0.222	LIM domain-binding protein 3 isoform b [Mus musculus]; PREDICTED: LIM domain-binding protein 3 isoform X1 [Mus musculus]; LIM domain-binding protein 3 isoform g [Mus musculus]	LIM domain-binding protein 3; LIM domain containing
			Lrrc10b	KO > WT	0.371	8.29	leucine-rich repeat-containing protein 10B [Mus musculus]	Leucine-rich repeat-containing protein 10B; Leucine rich repeat containing 10B
			Zfyve19	KO < WT	0.372	-0.162	abscission/NoCut checkpoint regulator isoform 2 [Mus musculus]; PREDICTED: abscission/NoCut checkpoint regulator isoform X1 [Mus musculus]; PREDICTED: abscission/NoCut checkpoint regulator isoform X3 [Mus musculus]; PREDICTED: abscission/NoCut checkpoint regulator isoform X4 [Mus musculus]; PREDICTED: abscission/NoCut checkpoint regulator isoform X2 [Mus musculus]; abscission/NoCut checkpoint reg…	Zinc finger FYVE domain-containing protein 19; Key regulator of abscission step in cytokinesis: part of the cytokinesis checkpoint, a process required to delay abscission to prevent both premature resolution of intercellular chromosome bridges and accumulation of DNA damage. Together with CHMP4C, required to retain abscission-competent VPS4 (VPS4A and/or VPS4B) at the midbody ring until abscissio…
		YES	Des	KO < WT	0.373	-0.606	desmin [Mus musculus]; vimentin [Mus musculus]	Desmin; Muscle-specific type III intermediate filament essential for proper muscular structure and function. Plays a crucial role in maintaining the structure of sarcomeres, inter-connecting the Z-disks and forming the myofibrils, linking them not only to the sarcolemmal cytoskeleton, but also to the nucleus and mitochondria, thus providing strength for the muscle fiber during activity. In adult …
		YES	Bcl9	KO < WT	0.375	-0.161	PREDICTED: B-cell CLL/lymphoma 9 protein isoform X1 [Mus musculus]; PREDICTED: B-cell CLL/lymphoma 9 protein isoform X3 [Mus musculus]; PREDICTED: B-cell CLL/lymphoma 9 protein isoform X2 [Mus musculus]	B-cell CLL/lymphoma 9 protein; Involved in signal transduction through the Wnt pathway. Promotes beta-catenin's transcriptional activity (By similarity); Belongs to the BCL9 family.
		YES	Hspb8	KO < WT	0.377	-0.241	heat shock protein beta-8 [Mus musculus]	Small stress protein-like protein HSP22; Displays temperature-dependent chaperone activity; Belongs to the small heat shock protein (HSP20) family.
			Rack1	KO < WT	0.378	-0.182	receptor of activated protein C kinase 1 [Mus musculus]	Guanine nucleotide binding protein (G protein), beta polypeptide 2-like 1; (Microbial infection) Contributes to the cap-independent internal ribosome entry site (IRES)-mediated translation by some RNA viruses; Belongs to the WD repeat G protein beta family. Ribosomal protein RACK1 subfamily.
			Col6a6	KO > WT	0.378	0.184	collagen alpha-6(VI) chain isoform 1 precursor [Mus musculus]; PREDICTED: collagen alpha-6(VI) chain isoform X1 [Mus musculus]	Collagen alpha-6(VI) chain; Collagen VI acts as a cell-binding protein; Collagens
		YES	Psmc5	KO > WT	0.38	0.151	26S proteasome regulatory subunit 8 [Mus musculus]	Proteasome (prosome, macropain) 26S subunit, ATPase, 5; Component of the 26S proteasome, a multiprotein complex involved in the ATP-dependent degradation of ubiquitinated proteins. This complex plays a key role in the maintenance of protein homeostasis by removing misfolded or damaged proteins, which could impair cellular functions, and by removing proteins whose functions are no longer required.…
YES (Dittmer 2013)			Kank2	KO < WT	0.38	-8.07	KN motif and ankyrin repeat domain-containing protein 2 [Mus musculus]	KN motif and ankyrin repeat domain-containing protein 2; Involved in transcription regulation by sequestering nuclear receptor coactivators, such as NCOA1, NCOA2 and NCOA3, in the cytoplasm; the function is deregulated by phosphorylation. Involved in the negative control of vitamin D receptor signaling pathway. May be involved in the control of cytoskeleton formation by regulating actin polymeriz…
			Myh3	KO < WT	0.382	-0.158	PREDICTED: myosin-1 isoform X1 [Mus musculus]; PREDICTED: myosin-3 isoform X1 [Mus musculus]; myosin-4 [Mus musculus]; myosin-2 [Mus musculus]; myosin-8 [Mus musculus]	Myosin heavy chain, fast skeletal muscle, embryonic; Muscle contraction; Belongs to the TRAFAC class myosin-kinesin ATPase superfamily. Myosin family.
		YES	sorbs1	KO < WT	0.383	-0.204	PREDICTED: sorbin and SH3 domain-containing protein 1 isoform X23 [Mus musculus]; PREDICTED: sorbin and SH3 domain-containing protein 1 isoform X34 [Mus musculus]; PREDICTED: sorbin and SH3 domain-containing protein 1 isoform X11 [Mus musculus]; PREDICTED: sorbin and SH3 domain-containing protein 1 isoform X4 [Mus musculus]; PREDICTED: sorbin and SH3 domain-containing protein 1 isoform X21 [Mus m…	Sorbin and SH3 domain-containing protein 1; Plays a role in tyrosine phosphorylation of CBL by linking CBL to the insulin receptor. Required for insulin- stimulated glucose transport. Involved in formation of actin stress fibers and focal adhesions (By similarity).
		YES	Myh10	KO < WT	0.384	-0.155	myosin-11 isoform 1 [Mus musculus]; PREDICTED: myosin-10 isoform X2 [Mus musculus]; PREDICTED: myosin-6 isoform X1 [Mus musculus]; PREDICTED: myosin-11 isoform X3 [Mus musculus]; PREDICTED: myosin-11 isoform X1 [Mus musculus]; PREDICTED: myosin-10 isoform X3 [Mus musculus]; myosin-6 [Mus musculus]; PREDICTED: myosin-10 isoform X1 [Mus musculus]; PREDICTED: myosin-11 isoform X2 [Mus musculus]; myo…	Cellular myosin heavy chain, type B; Cellular myosin that appears to play a role in cytokinesis, cell shape, and specialized functions such as secretion and capping. Involved with LARP6 in the stabilization of type I collagen mRNAs for CO1A1 and CO1A2. During cell spreading, plays an important role in cytoskeleton reorganization, focal contacts formation (in the central part but not the margins o…
			Tubb5	KO < WT	0.39	-0.205	tubulin beta-2A chain [Mus musculus]; tubulin beta-3 chain [Mus musculus]; tubulin beta-5 chain [Mus musculus]; tubulin beta-2B chain [Mus musculus]
		YES	Hnrnpf	KO > WT	0.394	0.149	PREDICTED: heterogeneous nuclear ribonucleoprotein F isoform X1 [Mus musculus]	Heterogeneous nuclear ribonucleoprotein F; Component of the heterogeneous nuclear ribonucleoprotein (hnRNP) complexes which provide the substrate for the processing events that pre-mRNAs undergo before becoming functional, translatable mRNAs in the cytoplasm. Plays a role in the regulation of alternative splicing events. Binds G-rich sequences in pre-mRNAs and keeps target RNA in an unfolded stat…
			Sptb	KO > WT	0.396	0.19	spectrin beta chain, erythrocytic [Mus musculus]	Spectrin beta chain, erythrocytic; Spectrin is the major constituent of the cytoskeletal network underlying the erythrocyte plasma membrane. It associates with band 4.1 and actin to form the cytoskeletal superstructure of the erythrocyte plasma membrane; Pleckstrin homology domain containing
			Lrrfip2	KO > WT	0.397	7.13	PREDICTED: leucine-rich repeat flightless-interacting protein 2 isoform X9 [Mus musculus]; PREDICTED: leucine-rich repeat flightless-interacting protein 2 isoform X21 [Mus musculus]; PREDICTED: leucine-rich repeat flightless-interacting protein 2 isoform X6 [Mus musculus]; PREDICTED: leucine-rich repeat flightless-interacting protein 2 isoform X3 [Mus musculus]; PREDICTED: leucine-rich repeat fli…	Leucine-rich repeat flightless-interacting protein 2; May function as activator of the canonical Wnt signaling pathway, in association with DVL3, upstream of CTNNB1/beta- catenin. Positively regulates Toll-like receptor (TLR) signaling in response to agonist probably by competing with the negative FLII regulator for MYD88-binding; Belongs to the LRRFIP family.
			Afg3l2	KO < WT	0.398	-0.122	AFG3-like protein 2 [Mus musculus]; PREDICTED: AFG3-like protein 2 isoform X1 [Mus musculus]	Paraplegin-like protein; ATP-dependent protease which is essential for axonal and neuron development. In neurons, mediates degradation of SMDT1/EMRE before its assembly with the uniporter complex, limiting the availability of SMDT1/EMRE for MCU assembly and promoting efficient assembly of gatekeeper subunits with MCU. Required for the maturation of paraplegin (SPG7) after its cleavage by mitochon…
	YES	YES	Tmem38a	KO < WT	0.402	-0.16	PREDICTED: trimeric intracellular cation channel type A isoform X2 [Mus musculus]; trimeric intracellular cation channel type A [Mus musculus]; PREDICTED: trimeric intracellular cation channel type A isoform X1 [Mus musculus]	Trimeric intracellular cation channel type A; Monovalent cation channel required for maintenance of rapid intracellular calcium release. May act as a potassium counter-ion channel that functions in synchronization with calcium release from intracellular stores.
			Arfgap2	KO > WT	0.404	0.173	ADP-ribosylation factor GTPase-activating protein 2 isoform 1 [Mus musculus]; ADP-ribosylation factor GTPase-activating protein 2 isoform 2 [Mus musculus]	ADP-ribosylation factor GTPase activating protein 2; GTPase-activating protein (GAP) for ADP ribosylation factor 1 (ARF1). Implicated in coatomer-mediated protein transport between the Golgi complex and the endoplasmic reticulum. Hydrolysis of ARF1-bound GTP may lead to dissociation of coatomer from Golgi-derived membranes to allow fusion with target membranes; ArfGAPs
			Fabp3	KO < WT	0.407	-0.158	fatty acid-binding protein, heart [Mus musculus]	Fatty acid binding protein 3, muscle and heart (mammary-derived growth inhibitor); FABP are thought to play a role in the intracellular transport of long-chain fatty acids and their acyl-CoA esters; Belongs to the calycin superfamily. Fatty-acid binding protein (FABP) family.
			Myh6	KO < WT	0.408	-0.172	PREDICTED: myosin-7B isoform X4 [Mus musculus]; PREDICTED: myosin-6 isoform X1 [Mus musculus]; PREDICTED: myosin-1 isoform X1 [Mus musculus]; PREDICTED: myosin-7B isoform X2 [Mus musculus]; PREDICTED: myosin-3 isoform X1 [Mus musculus]; myosin-4 [Mus musculus]; PREDICTED: myosin-7B isoform X1 [Mus musculus]; PREDICTED: myosin-7B isoform X5 [Mus musculus]; myosin-2 [Mus musculus]; myosin-6 [Mus mu…	Myosin heavy chain, cardiac muscle alpha isoform; Muscle contraction; Belongs to the TRAFAC class myosin-kinesin ATPase superfamily. Myosin family.
			Nefl	KO < WT	0.408	-0.177	neurofilament light polypeptide [Mus musculus]	Neurofilament, light polypeptide; Neurofilaments usually contain three intermediate filament proteins: L, M, and H which are involved in the maintenance of neuronal caliber.
		YES	Ldha	KO > WT	0.411	0.118	L-lactate dehydrogenase A chain isoform 2 [Mus musculus]; L-lactate dehydrogenase A chain isoform 1 [Mus musculus]	Cell proliferation-inducing gene 19 protein; Lactate dehydrogenase A; Belongs to the LDH/MDH superfamily. LDH family.
			Qtrt1	KO > WT	0.416	0.0774	queuine tRNA-ribosyltransferase catalytic subunit 1 [Mus musculus]; PREDICTED: queuine tRNA-ribosyltransferase isoform X4 [Mus musculus]	Queuine tRNA-ribosyltransferase catalytic subunit 1; Catalytic subunit of the queuine tRNA-ribosyltransferase (TGT) that catalyzes the base-exchange of a guanine (G) residue with queuine (Q) at position 34 (anticodon wobble position) in tRNAs with GU(N) anticodons (tRNA-Asp, -Asn, -His and -Tyr), resulting in the hypermodified nucleoside queuosine (7-(((4,5-cis- dihydroxy-2-cyclopenten-1-yl)amino…
			Lama4	KO > WT	0.417	3.17	laminin subunit alpha-4 precursor [Mus musculus]	Laminin-14 subunit alpha; Binding to cells via a high affinity receptor, laminin is thought to mediate the attachment, migration and organization of cells into tissues during embryonic development by interacting with other extracellular matrix components.
			Nebl	KO < WT	0.42	-0.313	PREDICTED: nebulette isoform X1 [Mus musculus]; PREDICTED: nebulette isoform X2 [Mus musculus]; PREDICTED: nebulette isoform X3 [Mus musculus]	Actin-binding Z-disk protein; Binds to actin and plays an important role in the assembly of the Z-disk. May functionally link sarcomeric actin to the desmin intermediate filaments in the heart muscle sarcomeres. Isoform 2 might play a role in the assembly of focal adhesion; LIM domain containing
			Myot	KO < WT	0.422	-0.276	PREDICTED: myotilin isoform X1 [Mus musculus]; PREDICTED: myotilin isoform X2 [Mus musculus]	Myofibrillar titin-like Ig domains protein; Component of a complex of multiple actin cross-linking proteins. Involved in the control of myofibril assembly and stability at the Z lines in muscle cells; I-set domain containing
		YES	Smyd1	KO < WT	0.423	-0.147	histone-lysine N-methyltransferase Smyd1 isoform 2 [Mus musculus]; histone-lysine N-methyltransferase Smyd1 isoform 1 [Mus musculus]	Histone-lysine N-methyltransferase SMYD1; Methylates histone H3 at 'Lys-4' (H3K4me), seems able to perform both mono-, di-, and trimethylation. Acts as a transcriptional repressor. Essential for cardiomyocyte differentiation and cardiac morphogenesis; Belongs to the class V-like SAM-binding methyltransferase superfamily.
		YES	Tubb4a	KO < WT	0.424	-0.108	tubulin beta-4A chain [Mus musculus]; tubulin beta-4B chain [Mus musculus]	Tubulin, beta 4A class IVa; Tubulin is the major constituent of microtubules. It binds two moles of GTP, one at an exchangeable site on the beta chain and one at a non-exchangeable site on the alpha chain; Tubulins
		YES	Hspb7	KO < WT	0.426	-0.231	heat shock protein beta-7 [Mus musculus]	Heat shock protein family B member 7
		YES	Hspa5	KO > WT	0.436	0.11	78 kDa glucose-regulated protein precursor [Mus musculus]; heat shock cognate 71 kDa protein [Mus musculus]; heat shock 70 kDa protein 1-like [Mus musculus]; PREDICTED: heat shock-related 70 kDa protein 2 isoform X1 [Mus musculus]	Heat shock 70kDa protein 5 (glucose-regulated protein, 78kDa); Plays a role in facilitating the assembly of multimeric protein complexes inside the endoplasmic reticulum. Involved in the correct folding of proteins and degradation of misfolded proteins via its interaction with DNAJC10, probably to facilitate the release of DNAJC10 from its substrate (By similarity); Belongs to the heat shock prot…
			Nefl	KO < WT	0.44	-0.474	neurofilament light polypeptide [Mus musculus]; alpha-internexin [Mus musculus]; neurofilament medium polypeptide [Mus musculus]; desmin [Mus musculus]; vimentin [Mus musculus]; neurofilament heavy polypeptide [Mus musculus]	Neurofilament, light polypeptide; Neurofilaments usually contain three intermediate filament proteins: L, M, and H which are involved in the maintenance of neuronal caliber.
			Tubb5	KO < WT	0.443	-0.144	tubulin beta-2A chain [Mus musculus]; tubulin beta-5 chain [Mus musculus]; tubulin beta-4B chain [Mus musculus]; tubulin beta-2B chain [Mus musculus]
			Sepsecs	KO > WT	0.451	0.16	PREDICTED: O-phosphoseryl-tRNA(Sec) selenium transferase isoform X1 [Mus musculus]; O-phosphoseryl-tRNA(Sec) selenium transferase [Mus musculus]	Sep (O-phosphoserine) tRNA:Sec (selenocysteine) tRNA synthase; Converts O-phosphoseryl-tRNA(Sec) to selenocysteinyl- tRNA(Sec) required for selenoprotein biosynthesis.
			Ovgp1	KO < WT	0.452	-0.256	oviduct-specific glycoprotein precursor [Mus musculus]	Estrogen-dependent oviduct protein; Binds to oocyte zona pellucida in vivo. May play a role in the fertilization process and/or early embryonic development; Chitinases
			H2bc22	KO < WT	0.453	-0.316	histone H2B type 1-B [Mus musculus]; PREDICTED: histone H2B type 1-P isoform X1 [Mus musculus]; histone H2B type 2-B [Mus musculus]; histone H2B type 2-E [Mus musculus]; histone H2B type 1-K [Mus musculus]; histone H2B type 1-M [Mus musculus]; histone H2B type 1-H [Mus musculus]; histone H2B type 1-A [Mus musculus]; histone H2B type 3-A [Mus musculus]; histone H2B type 1-P isoform 1 [Mus musculus…
		YES	HIST1H1E	KO > WT	0.459	3.22	histone H1.4 [Mus musculus]; histone H1t [Mus musculus]; histone H1.5 [Mus musculus]; histone H1.2 [Mus musculus]; histone H1.3 [Mus musculus]	Histone cluster 1, H1e; Histone H1 protein binds to linker DNA between nucleosomes forming the macromolecular structure known as the chromatin fiber. Histones H1 are necessary for the condensation of nucleosome chains into higher-order structured fibers. Acts also as a regulator of individual gene transcription through chromatin remodeling, nucleosome spacing and DNA methylation (By similarity).
		YES	Dmd	KO < WT	0.473	-0.176	PREDICTED: dystrophin isoform X3 [Mus musculus]; PREDICTED: utrophin isoform X5 [Mus musculus]; PREDICTED: dystrophin-related protein 2 isoform X2 [Mus musculus]; PREDICTED: utrophin isoform X1 [Mus musculus]; PREDICTED: dystrophin-related protein 2 isoform X3 [Mus musculus]; PREDICTED: utrophin isoform X7 [Mus musculus]; PREDICTED: dystrophin isoform X6 [Mus musculus]; PREDICTED: dystrophin isof…	Dystrophin; Anchors the extracellular matrix to the cytoskeleton via F-actin. Ligand for dystroglycan. Component of the dystrophin- associated glycoprotein complex which accumulates at the neuromuscular junction (NMJ) and at a variety of synapses in the peripheral and central nervous systems and has a structural function in stabilizing the sarcolemma. Also implicated in signaling events and synap…
		YES	Hspa8	KO < WT	0.475	-0.0856	heat shock cognate 71 kDa protein [Mus musculus]; PREDICTED: heat shock-related 70 kDa protein 2 isoform X1 [Mus musculus]	Lipopolysaccharide-associated protein 1; Molecular chaperone implicated in a wide variety of cellular processes, including protection of the proteome from stress, folding and transport of newly synthesized polypeptides, activation of proteolysis of misfolded proteins and the formation and dissociation of protein complexes. Plays a pivotal role in the protein quality control system, ensuring the c…
		YES	Eef1a1	KO < WT	0.479	-0.107	elongation factor 1-alpha 1 [Mus musculus]; elongation factor 1-alpha 2 [Mus musculus]	Eukaryotic translation elongation factor 1 alpha 1; This protein promotes the GTP-dependent binding of aminoacyl-tRNA to the A-site of ribosomes during protein biosynthesis. With PARP1 and TXK, forms a complex that acts as a T helper 1 (Th1) cell-specific transcription factor and binds the promoter of IFN-gamma to directly regulate its transcription, and is thus involved importantly in Th1 cytoki…
		YES	Sorbs2	KO < WT	0.482	-0.392	PREDICTED: sorbin and SH3 domain-containing protein 2 isoform X23 [Mus musculus]; PREDICTED: sorbin and SH3 domain-containing protein 2 isoform X22 [Mus musculus]; PREDICTED: sorbin and SH3 domain-containing protein 2 isoform X29 [Mus musculus]; PREDICTED: sorbin and SH3 domain-containing protein 2 isoform X26 [Mus musculus]; PREDICTED: sorbin and SH3 domain-containing protein 2 isoform X31 [Mus …	Sorbin and SH3 domain-containing protein 2; Adapter protein that plays a role in the assembling of signaling complexes, being a link between ABL kinases and actin cytoskeleton. Can form complex with ABL1 and CBL, thus promoting ubiquitination and degradation of ABL1 or with AKT1 and PAK1, thus mediating AKT1-mediated activation of PAK1. May play a role in the regulation of pancreatic cell adhesio…
			Myh7	KO > WT	0.484	0.212	PREDICTED: myosin-7 isoform X1 [Mus musculus]	Myosin heavy chain, cardiac muscle beta isoform; Myosins are actin-based motor molecules with ATPase activity essential for muscle contraction. Forms regular bipolar thick filaments that, together with actin thin filaments, constitute the fundamental contractile unit of skeletal and cardiac muscle; Belongs to the TRAFAC class myosin-kinesin ATPase superfamily. Myosin family.
			Fam173b	KO < WT	0.485	-0.315	protein FAM173B [Mus musculus]; PREDICTED: protein FAM173B isoform X1 [Mus musculus]	Family with sequence similarity 173, member B; Seven-beta-strand methyltransferase motif containing; Belongs to the FAM173 family.
		YES	Pfkm	KO < WT	0.486	-0.0766	PREDICTED: ATP-dependent 6-phosphofructokinase, muscle type isoform X2 [Mus musculus]; PREDICTED: ATP-dependent 6-phosphofructokinase, muscle type isoform X1 [Mus musculus]	ATP-dependent 6-phosphofructokinase, muscle type; Catalyzes the phosphorylation of D-fructose 6-phosphate to fructose 1,6-bisphosphate by ATP, the first committing step of glycolysis; Belongs to the phosphofructokinase type A (PFKA) family. ATP-dependent PFK group I subfamily. Eukaryotic two domain clade "E" sub-subfamily.
			Dnajc10	KO < WT	0.492	-0.243	dnaJ homolog subfamily C member 10 precursor [Mus musculus]	Endoplasmic reticulum DNA J domain-containing protein 5; Endoplasmic reticulum disulfide reductase involved both in the correct folding of proteins and degradation of misfolded proteins. Required for efficient folding of proteins in the endoplasmic reticulum by catalyzing the removal of non-native disulfide bonds formed during the folding of proteins, such as LDLR. Also involved in endoplasmic re…
			Col4a5	KO > WT	0.495	0.172	collagen alpha-5(IV) chain precursor [Mus musculus]; collagen alpha-1(IV) chain precursor [Mus musculus]; PREDICTED: collagen alpha-1(IV) chain isoform X1 [Mus musculus]; PREDICTED: collagen alpha-5(IV) chain isoform X2 [Mus musculus]; PREDICTED: collagen alpha-5(IV) chain isoform X3 [Mus musculus]; PREDICTED: collagen alpha-5(IV) chain isoform X1 [Mus musculus]	Collagen alpha-5(IV) chain; Type IV collagen is the major structural component of glomerular basement membranes (GBM), forming a 'chicken-wire' meshwork together with laminins, proteoglycans and entactin/nidogen; Collagens
			Capn2	KO < WT	0.501	-0.157	calpain-2 catalytic subunit [Mus musculus]	Calcium-activated neutral proteinase 2; Calcium-regulated non-lysosomal thiol-protease which catalyzes limited proteolysis of substrates involved in cytoskeletal remodeling and signal transduction. Proteolytically cleaves MYOC at 'Arg-226'. Proteolytically cleaves CPEB3 following neuronal stimulation which abolishes CPEB3 translational repressor activity, leading to translation of CPEB3 target mR…
		YES	Msn	KO < WT	0.506	-4.21	moesin [Mus musculus]	Membrane-organizing extension spike protein; Probably involved in connections of major cytoskeletal structures to the plasma membrane. May inhibit herpes simplex virus 1 infection at an early stage. Plays a role in regulating the proliferation, migration, and adhesion of human lymphoid cells and participates in immunologic synapse formation; FERM domain containing
		YES	Myh10	KO > WT	0.514	0.151	myosin-11 isoform 1 [Mus musculus]; PREDICTED: myosin-10 isoform X2 [Mus musculus]; PREDICTED: myosin-11 isoform X3 [Mus musculus]; PREDICTED: myosin-11 isoform X1 [Mus musculus]; PREDICTED: myosin-10 isoform X3 [Mus musculus]; PREDICTED: myosin-10 isoform X1 [Mus musculus]; PREDICTED: myosin-11 isoform X2 [Mus musculus]; myosin-11 isoform 2 [Mus musculus]; myosin-10 [Mus musculus]	Cellular myosin heavy chain, type B; Cellular myosin that appears to play a role in cytokinesis, cell shape, and specialized functions such as secretion and capping. Involved with LARP6 in the stabilization of type I collagen mRNAs for CO1A1 and CO1A2. During cell spreading, plays an important role in cytoskeleton reorganization, focal contacts formation (in the central part but not the margins o…
			Lamc1	KO < WT	0.514	-0.116	laminin subunit gamma-1 precursor [Mus musculus]	Laminin, gamma 1 (formerly LAMB2); Binding to cells via a high affinity receptor, laminin is thought to mediate the attachment, migration and organization of cells into tissues during embryonic development by interacting with other extracellular matrix components.
			Myh13	KO < WT	0.515	-0.118	myosin-13 [Mus musculus]	Myosin heavy chain, skeletal muscle, extraocular; Fast twitching myosin mediating the high-velocity and low-tension contractions of specific striated muscles; Myosin heavy chains
			Col1a2	KO < WT	0.515	-0.313	collagen alpha-2(I) chain preproprotein [Mus musculus]	Collagen alpha-2(I) chain; Type I collagen is a member of group I collagen (fibrillar forming collagen); Belongs to the fibrillar collagen family.
			F13a1	KO < WT	0.516	-0.225	coagulation factor XIII A chain precursor [Mus musculus]	Protein-glutamine gamma-glutamyltransferase A chain; Factor XIII is activated by thrombin and calcium ion to a transglutaminase that catalyzes the formation of gamma-glutamyl- epsilon-lysine cross-links between fibrin chains, thus stabilizing the fibrin clot. Also cross-link alpha-2-plasmin inhibitor, or fibronectin, to the alpha chains of fibrin.
		YES	Gapdh	KO < WT	0.517	-0.0932	PREDICTED: glyceraldehyde-3-phosphate dehydrogenase isoform X1 [Mus musculus]; glyceraldehyde-3-phosphate dehydrogenase isoform 1 [Mus musculus]; PREDICTED: glyceraldehyde-3-phosphate dehydrogenase [Mus musculus]	Glyceraldehyde-3-phosphate dehydrogenase; Has both glyceraldehyde-3-phosphate dehydrogenase and nitrosylase activities, thereby playing a role in glycolysis and nuclear functions, respectively. Participates in nuclear events including transcription, RNA transport, DNA replication and apoptosis. Nuclear functions are probably due to the nitrosylase activity that mediates cysteine S-nitrosylation o…
		YES	Ndrg2	KO < WT	0.523	-0.138	PREDICTED: protein NDRG2 isoform X3 [Mus musculus]; PREDICTED: protein NDRG2 isoform X2 [Mus musculus]; PREDICTED: protein NDRG2 isoform X1 [Mus musculus]; PREDICTED: protein NDRG2 isoform X4 [Mus musculus]	N-myc downstream-regulated gene 2 protein; Contributes to the regulation of the Wnt signaling pathway. Down-regulates CTNNB1-mediated transcriptional activation of target genes, such as CCND1, and may thereby act as tumor suppressor. May be involved in dendritic cell and neuron differentiation.
			Myh6	KO < WT	0.523	-0.118	PREDICTED: myosin-7B isoform X4 [Mus musculus]; PREDICTED: myosin-6 isoform X1 [Mus musculus]; PREDICTED: myosin-1 isoform X1 [Mus musculus]; PREDICTED: myosin-7B isoform X2 [Mus musculus]; PREDICTED: myosin-3 isoform X1 [Mus musculus]; myosin-4 [Mus musculus]; PREDICTED: myosin-7B isoform X1 [Mus musculus]; PREDICTED: myosin-7B isoform X5 [Mus musculus]; myosin-2 [Mus musculus]; myosin-6 [Mus mu…	Myosin heavy chain, cardiac muscle alpha isoform; Muscle contraction; Belongs to the TRAFAC class myosin-kinesin ATPase superfamily. Myosin family.
			Lamb3	KO < WT	0.526	-8.05	PREDICTED: laminin subunit beta-3 isoform X1 [Mus musculus]	Epiligrin subunit bata; Binding to cells via a high affinity receptor, laminin is thought to mediate the attachment, migration and organization of cells into tissues during embryonic development by interacting with other extracellular matrix components.
			Eno3	KO > WT	0.53	0.114	PREDICTED: beta-enolase isoform X2 [Mus musculus]; PREDICTED: beta-enolase isoform X1 [Mus musculus]	2-phospho-D-glycerate hydro-lyase; Appears to have a function in striated muscle development and regeneration; Belongs to the enolase family.
			Zc3h3	KO > WT	0.532	0.508	PREDICTED: zinc finger CCCH domain-containing protein 3 isoform X2 [Mus musculus]; zinc finger CCCH domain-containing protein 3 [Mus musculus]; PREDICTED: zinc finger CCCH domain-containing protein 3 isoform X1 [Mus musculus]	Zinc finger CCCH domain-containing protein 3; Required for the export of polyadenylated mRNAs from the nucleus. Enhances ACVR1B-induced SMAD-dependent transcription. Binds to single-stranded DNA but not to double- stranded DNA in vitro. Involved in RNA cleavage (By similarity); Zinc fingers CCCH-type
			Fam89a	KO > WT	0.543	0.0616	protein FAM89A [Mus musculus]	Family with sequence similarity 89 member A; Belongs to the FAM89 family.
			Fga	KO > WT	0.55	0.131	fibrinogen alpha chain isoform 1 preproprotein [Mus musculus]; fibrinogen alpha chain isoform 2 precursor [Mus musculus]	Fibrinogen alpha chain; Cleaved by the protease thrombin to yield monomers which, together with fibrinogen beta (FGB) and fibrinogen gamma (FGG), polymerize to form an insoluble fibrin matrix. Fibrin has a major function in hemostasis as one of the primary components of blood clots. In addition, functions during the early stages of wound repair to stabilize the lesion and guide cell migration dur…
			Asap2	KO < WT	0.552	-7.56	PREDICTED: arf-GAP with SH3 domain, ANK repeat and PH domain-containing protein 2 isoform X2 [Mus musculus]; arf-GAP with SH3 domain, ANK repeat and PH domain-containing protein 2 isoform a [Mus musculus]; arf-GAP with SH3 domain, ANK repeat and PH domain-containing protein 2 isoform c [Mus musculus]; arf-GAP with SH3 domain, ANK repeat and PH domain-containing protein 2 isoform b [Mus musculus];…	Arf-GAP with SH3 domain, ANK repeat and PH domain-containing protein 2; Activates the small GTPases ARF1, ARF5 and ARF6. Regulates the formation of post-Golgi vesicles and modulates constitutive secretion. Modulates phagocytosis mediated by Fc gamma receptor and ARF6. Modulates PXN recruitment to focal contacts and cell migration; Ankyrin repeat domain containing
			Fgb	KO < WT	0.554	-0.101	fibrinogen beta chain preproprotein [Mus musculus]	Fibrinogen beta chain; Cleaved by the protease thrombin to yield monomers which, together with fibrinogen alpha (FGA) and fibrinogen gamma (FGG), polymerize to form an insoluble fibrin matrix. Fibrin has a major function in hemostasis as one of the primary components of blood clots. In addition, functions during the early stages of wound repair to stabilize the lesion and guide cell migration dur…
			Col6a3	KO < WT	0.56	-0.14	collagen alpha-3(VI) chain isoform 1 precursor [Mus musculus]; collagen alpha-3(VI) chain isoform 2 precursor [Mus musculus]	Collagen alpha-3(VI) chain; Collagen VI acts as a cell-binding protein; Collagens
		YES	Tubb4a	KO < WT	0.565	-0.113	tubulin beta-4A chain [Mus musculus]	Tubulin, beta 4A class IVa; Tubulin is the major constituent of microtubules. It binds two moles of GTP, one at an exchangeable site on the beta chain and one at a non-exchangeable site on the alpha chain; Tubulins
			Myh6	KO > WT	0.566	0.117	PREDICTED: myosin-6 isoform X1 [Mus musculus]; PREDICTED: myosin-3 isoform X1 [Mus musculus]; myosin-2 [Mus musculus]; myosin-6 [Mus musculus]; myosin-13 [Mus musculus]; myosin-8 [Mus musculus]	Myosin heavy chain, cardiac muscle alpha isoform; Muscle contraction; Belongs to the TRAFAC class myosin-kinesin ATPase superfamily. Myosin family.
		YES	Hspb1	KO > WT	0.581	0.0906	heat shock protein beta-1 [Mus musculus]	Estrogen-regulated 24 kDa protein; Small heat shock protein which functions as a molecular chaperone probably maintaining denatured proteins in a folding- competent state. Plays a role in stress resistance and actin organization. Through its molecular chaperone activity may regulate numerous biological processes including the phosphorylation and the axonal transport of neurofilament proteins.
			Myh6	KO < WT	0.593	-0.0666	PREDICTED: myosin-7B isoform X4 [Mus musculus]; PREDICTED: myosin-6 isoform X1 [Mus musculus]; PREDICTED: myosin-1 isoform X1 [Mus musculus]; PREDICTED: myosin-7B isoform X2 [Mus musculus]; PREDICTED: myosin-3 isoform X1 [Mus musculus]; myosin-4 [Mus musculus]; PREDICTED: myosin-7B isoform X1 [Mus musculus]; PREDICTED: myosin-7B isoform X5 [Mus musculus]; myosin-2 [Mus musculus]; myosin-6 [Mus mu…	Myosin heavy chain, cardiac muscle alpha isoform; Muscle contraction; Belongs to the TRAFAC class myosin-kinesin ATPase superfamily. Myosin family.
			Igtp	KO > WT	0.597	4.07	interferon gamma induced GTPase [Mus musculus]
			Ablim2	KO < WT	0.603	-3.57	PREDICTED: actin-binding LIM protein 2 isoform X4 [Mus musculus]; PREDICTED: actin-binding LIM protein 2 isoform X24 [Mus musculus]; PREDICTED: actin-binding LIM protein 2 isoform X8 [Mus musculus]; PREDICTED: actin-binding LIM protein 2 isoform X23 [Mus musculus]; PREDICTED: actin-binding LIM protein 2 isoform X5 [Mus musculus]; actin-binding LIM protein 2 isoform 1 [Mus musculus]; actin-binding…	Actin binding LIM protein family, member 2; May act as scaffold protein. May stimulate ABRA activity and ABRA-dependent SRF transcriptional activity; LIM domain containing
			Lima1	KO < WT	0.605	-0.203	LIM domain and actin-binding protein 1 isoform b [Mus musculus]; LIM domain and actin-binding protein 1 isoform a [Mus musculus]	LIM domain and actin-binding protein 1; Binds to actin monomers and filaments. Increases the number and size of actin stress fibers and inhibits membrane ruffling. Inhibits actin filament depolymerization. Bundles actin filaments, delays filament nucleation and reduces formation of branched filaments; LIM domain containing
			Bgn	KO < WT	0.606	-0.208	biglycan preproprotein [Mus musculus]; PREDICTED: biglycan isoform X1 [Mus musculus]; decorin preproprotein [Mus musculus]	Bone/cartilage proteoglycan I; May be involved in collagen fiber assembly; Small leucine rich repeat proteoglycans
			Fn1	KO < WT	0.609	-0.0986	fibronectin isoform f precursor [Mus musculus]; fibronectin isoform a precursor [Mus musculus]; PREDICTED: fibronectin isoform X3 [Mus musculus]; PREDICTED: fibronectin isoform X6 [Mus musculus]; PREDICTED: fibronectin isoform X5 [Mus musculus]; fibronectin isoform c precursor [Mus musculus]; fibronectin isoform g precursor [Mus musculus]; fibronectin isoform e precursor [Mus musculus]; fibronect…	Fibronectin type III domain containing; Endogenous ligands
			Ank2	KO < WT	0.621	-0.12	PREDICTED: ankyrin-2 isoform X30 [Mus musculus]; PREDICTED: ankyrin-2 isoform X31 [Mus musculus]; PREDICTED: ankyrin-2 isoform X10 [Mus musculus]; PREDICTED: ankyrin-2 isoform X12 [Mus musculus]; PREDICTED: ankyrin-2 isoform X6 [Mus musculus]; PREDICTED: ankyrin-2 isoform X27 [Mus musculus]; PREDICTED: ankyrin-2 isoform X41 [Mus musculus]; PREDICTED: ankyrin-2 isoform X1 [Mus musculus]; PREDICTED…	Non-erythroid ankyrin; In skeletal muscle, required for proper localization of DMD and DCTN4 and for the formation and/or stability of a special subset of microtubules associated with costameres and neuromuscular junctions. Attaches integral membrane proteins to cytoskeletal elements. Also binds to cytoskeletal proteins. Required for coordinate assembly of Na/Ca exchanger, Na/K ATPase and InsP3 r…
		YES	Ndufa13	KO < WT	0.623	-0.182	PREDICTED: NADH dehydrogenase [ubiquinone] 1 alpha subcomplex subunit 13 isoform X1 [Mus musculus]; PREDICTED: NADH dehydrogenase [ubiquinone] 1 alpha subcomplex subunit 13 isoform X2 [Mus musculus]; PREDICTED: NADH dehydrogenase [ubiquinone] 1 alpha subcomplex subunit 13 isoform X5 [Mus musculus]; PREDICTED: NADH dehydrogenase [ubiquinone] 1 alpha subcomplex subunit 13 isoform X3 [Mus musculus]	Gene associated with retinoic and interferon-induced mortality 19 protein; Accessory subunit of the mitochondrial membrane respiratory chain NADH dehydrogenase (Complex I), that is believed not to be involved in catalysis. Complex I functions in the transfer of electrons from NADH to the respiratory chain. The immediate electron acceptor for the enzyme is believed to be ubiquinone. Involved in th…
			Ybx1	KO < WT	0.63	-0.0738	Y-box-binding protein 3 long isoform [Mus musculus]; Y-box-binding protein 2 isoform 2 [Mus musculus]; PREDICTED: Y-box-binding protein 2 isoform X3 [Mus musculus]; PREDICTED: Y-box-binding protein 2 isoform X1 [Mus musculus]; Y-box-binding protein 3 short isoform [Mus musculus]; nuclease-sensitive element-binding protein 1 [Mus musculus]; Y-box-binding protein 2 isoform 1 [Mus musculus]; PREDICT…	CCAAT-binding transcription factor I subunit A; Mediates pre-mRNA alternative splicing regulation. Binds to splice sites in pre-mRNA and regulates splice site selection. Binds and stabilizes cytoplasmic mRNA. Contributes to the regulation of translation by modulating the interaction between the mRNA and eukaryotic initiation factors (By similarity). Regulates the transcription of numerous genes. …
		YES	Hspb6	KO > WT	0.634	0.102	heat shock protein beta-6 [Mus musculus]; PREDICTED: heat shock protein beta-6 isoform X1 [Mus musculus]	Heat shock protein, alpha-crystallin-related, B6; Small heat shock protein which functions as a molecular chaperone probably maintaining denatured proteins in a folding- competent state. Seems to have versatile functions in various biological processes. Plays a role in regulating muscle function such as smooth muscle vasorelaxation and cardiac myocyte contractility. May regulate myocardial angiog…
			Srl	KO > WT	0.638	0.0742	PREDICTED: sarcalumenin isoform X3 [Mus musculus]; PREDICTED: sarcalumenin isoform X1 [Mus musculus]; sarcalumenin isoform 2 precursor [Mus musculus]; PREDICTED: sarcalumenin isoform X2 [Mus musculus]; sarcalumenin isoform 1 precursor [Mus musculus]; PREDICTED: sarcalumenin isoform X5 [Mus musculus]	Sarcalumenin; May be involved in the regulation of calcium transport.
		YES	Tubb4b	KO < WT	0.641	-0.0556	tubulin beta-4B chain [Mus musculus]	Tubulin, beta 4B class IVb; Tubulin is the major constituent of microtubules. It binds two moles of GTP, one at an exchangeable site on the beta chain and one at a non-exchangeable site on the alpha chain; Belongs to the tubulin family.
			Pzp	KO < WT	0.642	-0.184	pregnancy zone protein precursor [Mus musculus]	C3 and PZP-like alpha-2-macroglobulin domain-containing protein 6; Is able to inhibit all four classes of proteinases by a unique 'trapping' mechanism. This protein has a peptide stretch, called the 'bait region' which contains specific cleavage sites for different proteinases. When a proteinase cleaves the bait region, a conformational change is induced in the protein which traps the proteinase.…
			Hsdl2	KO > WT	0.643	0.0576	PREDICTED: hydroxysteroid dehydrogenase-like protein 2 isoform X2 [Mus musculus]; PREDICTED: hydroxysteroid dehydrogenase-like protein 2 isoform X1 [Mus musculus]; hydroxysteroid dehydrogenase-like protein 2 isoform 1 [Mus musculus]; hydroxysteroid dehydrogenase-like protein 2 isoform 2 [Mus musculus]	Short chain dehydrogenase/reductase family 13C member 1; Has apparently no steroid dehydrogenase activity; Belongs to the short-chain dehydrogenases/reductases (SDR) family.
			Cgnl1	KO > WT	0.648	0.193	PREDICTED: cingulin-like protein 1 isoform X1 [Mus musculus]	Junction-associated coiled-coil protein; May be involved in anchoring the apical junctional complex, especially tight junctions, to actin-based cytoskeletons.
		YES	Acad11	KO > WT	0.649	0.14	acyl-CoA dehydrogenase family member 11 [Mus musculus]	acyl-CoA dehydrogenase family, member 11; Acyl-CoA dehydrogenase, that exhibits maximal activity towards saturated C22-CoA.
			Gm5409	KO > WT	0.649	0.232	PREDICTED: try10-like trypsinogen isoform X1 [Mus musculus]; Try10-like trypsinogen precursor [Mus musculus]; trypsin 10 precursor [Mus musculus]
			Col2a1	KO < WT	0.65	-0.293	PREDICTED: collagen alpha-1(II) chain isoform X1 [Mus musculus]; collagen alpha-1(II) chain isoform 1 preproprotein [Mus musculus]; collagen alpha-1(II) chain isoform 2 precursor [Mus musculus]	Collagen alpha-1(II) chain; Type II collagen is specific for cartilaginous tissues. It is essential for the normal embryonic development of the skeleton, for linear growth and for the ability of cartilage to resist compressive forces.
		YES	Csrp3	KO < WT	0.652	-0.062	cysteine and glycine-rich protein 3 [Mus musculus]	Cysteine and glycine-rich protein 3 (cardiac LIM protein); Positive regulator of myogenesis. Acts as cofactor for myogenic bHLH transcription factors such as MYOD1, and probably MYOG and MYF6. Enhances the DNA-binding activity of the MYOD1:TCF3 isoform E47 complex and may promote formation of a functional MYOD1:TCF3 isoform E47:MEF2A complex involved in myogenesis (By similarity). Plays a crucial…
			Ap2m1	KO < WT	0.653	-0.098	AP-2 complex subunit mu isoform 1 [Mus musculus]; AP-2 complex subunit mu isoform 2 [Mus musculus]	Clathrin assembly protein complex 2 mu medium chain; Component of the adaptor protein complex 2 (AP-2). Adaptor protein complexes function in protein transport via transport vesicles in different membrane traffic pathways. Adaptor protein complexes are vesicle coat components and appear to be involved in cargo selection and vesicle formation. AP-2 is involved in clathrin-dependent endocytosis in …
			Fgg	KO < WT	0.654	-0.108	fibrinogen gamma chain isoform 1 precursor [Mus musculus]; fibrinogen gamma chain isoform 2 precursor [Mus musculus]	Fibrinogen gamma chain; Together with fibrinogen alpha (FGA) and fibrinogen beta (FGB), polymerizes to form an insoluble fibrin matrix. Has a major function in hemostasis as one of the primary components of blood clots. In addition, functions during the early stages of wound repair to stabilize the lesion and guide cell migration during re- epithelialization. Was originally thought to be essentia…
			Prph	KO < WT	0.657	-0.22	peripherin isoform 3 [Mus musculus]; PREDICTED: peripherin isoform X2 [Mus musculus]; PREDICTED: peripherin isoform X1 [Mus musculus]; peripherin isoform 2 [Mus musculus]; vimentin [Mus musculus]	Neurofilament 4; Class-III neuronal intermediate filament protein.
			Prss1	KO > WT	0.659	0.258	protease, serine, 1 precursor [Mus musculus]	Protease, serine, 1 (trypsin 1); Has activity against the synthetic substrates Boc-Phe- Ser-Arg-Mec, Boc-Leu-Thr-Arg-Mec, Boc-Gln-Ala-Arg-Mec and Boc-Val- Pro-Arg-Mec. The single-chain form is more active than the two- chain form against all of these substrates; Belongs to the peptidase S1 family.
			Nppa	KO < WT	0.659	-0.152	natriuretic peptides A preproprotein [Mus musculus]	Cardiodilatin-related peptide; Hormone playing a key role in cardiovascular homeostasis through regulation of natriuresis, diuresis, and vasodilation. Also plays a role in female pregnancy by promoting trophoblast invasion and spiral artery remodeling in uterus. Specifically binds and stimulates the cGMP production of the NPR1 receptor. Binds the clearance receptor NPR3; Belongs to the natriureti…
			Farsa	KO < WT	0.663	-0.075	phenylalanine--tRNA ligase alpha subunit [Mus musculus]	phenylalanyl-tRNA synthetase alpha subunit; Aminoacyl tRNA synthetases, Class II
			Tnxb	KO < WT	0.67	-0.11	PREDICTED: tenascin-X isoform X4 [Mus musculus]; PREDICTED: tenascin-X isoform X1 [Mus musculus]; PREDICTED: tenascin-X isoform X3 [Mus musculus]; PREDICTED: tenascin-X isoform X2 [Mus musculus]; PREDICTED: tenascin-X isoform X7 [Mus musculus]	Hexabrachion-like protein; Appears to mediate interactions between cells and the extracellular matrix. Substrate-adhesion molecule that appears to inhibit cell migration. Accelerates collagen fibril formation. May play a role in supporting the growth of epithelial tumors; Fibrinogen C domain containing
YES (Haque 2010)	YES	YES	Sun2	KO > WT	0.672	0.168	SUN domain-containing protein 2 isoform 1 [Mus musculus]; SUN domain-containing protein 2 isoform 3 [Mus musculus]; SUN domain-containing protein 2 isoform 2 [Mus musculus]; PREDICTED: SUN domain-containing protein 2 isoform X1 [Mus musculus]	Sad1 and UNC84 domain containing 2; As a component of the LINC (LInker of Nucleoskeleton and Cytoskeleton) complex, involved in the connection between the nuclear lamina and the cytoskeleton. The nucleocytoplasmic interactions established by the LINC complex play an important role in the transmission of mechanical forces across the nuclear envelope and in nuclear movement and positioning. Specifi…
			Hspg2	KO < WT	0.681	-0.0364	PREDICTED: basement membrane-specific heparan sulfate proteoglycan core protein isoform X1 [Mus musculus]; basement membrane-specific heparan sulfate proteoglycan core protein precursor [Mus musculus]; PREDICTED: basement membrane-specific heparan sulfate proteoglycan core protein isoform X2 [Mus musculus]	Basement membrane-specific heparan sulfate proteoglycan core protein; Integral component of basement membranes. Component of the glomerular basement membrane (GBM), responsible for the fixed negative electrostatic membrane charge, and which provides a barrier which is both size- and charge-selective. It serves as an attachment substrate for cells. Plays essential roles in vascularization. Critica…
			Ldhb	KO > WT	0.693	0.0446	L-lactate dehydrogenase B chain isoform Ldhbx [Mus musculus]; L-lactate dehydrogenase B chain isoform 2 [Mus musculus]; L-lactate dehydrogenase B chain isoform Ldhb [Mus musculus]	Renal carcinoma antigen NY-REN-46; Lactate dehydrogenase B; Belongs to the LDH/MDH superfamily. LDH family.
		YES	Ehd2	KO > WT	0.693	0.0448	PREDICTED: EH domain-containing protein 2 isoform X1 [Mus musculus]	EH domain-containing protein 2; ATP- and membrane-binding protein that controls membrane reorganization/tubulation upon ATP hydrolysis (By similarity). Plays a role in membrane trafficking between the plasma membrane and endosomes. Important for the internalization of GLUT4. Required for fusion of myoblasts to skeletal muscle myotubes. Required for normal translocation of FER1L5 to the plasma mem…
		YES	Pias2	KO > WT	0.694	0.0578	E3 SUMO-protein ligase PIAS2 isoform 4 [Mus musculus]; PREDICTED: E3 SUMO-protein ligase PIAS2 isoform X2 [Mus musculus]; E3 SUMO-protein ligase PIAS2 isoform 3 [Mus musculus]; E3 SUMO-protein ligase PIAS2 isoform 2 [Mus musculus]; E3 SUMO-protein ligase PIAS2 isoform 5 [Mus musculus]; E3 SUMO-protein ligase PIAS2 isoform 1 [Mus musculus]; PREDICTED: E3 SUMO-protein ligase PIAS2 isoform X1 [Mus m…	Androgen receptor-interacting protein 3; Functions as an E3-type small ubiquitin-like modifier (SUMO) ligase, stabilizing the interaction between UBE2I and the substrate, and as a SUMO-tethering factor. Plays a crucial role as a transcriptional coregulator in various cellular pathways, including the STAT pathway, the p53 pathway and the steroid hormone signaling pathway. The effects of this trans…
			Ttll4	KO > WT	0.698	0.0544	PREDICTED: tubulin polyglutamylase TTLL4 isoform X1 [Mus musculus]	Tubulin tyrosine ligase-like family, member 4; Glutamylase which preferentially modifies beta-tubulin and non-tubulin proteins, such as NAP1L1, NAP1L4 and CGAS/MB21D1. Involved in the side-chain initiation step of the polyglutamylation reaction rather than in the elongation step. Involved in formation of short side-chains. Mediates initiation of polyglutamylation of nucleosome assembly proteins N…
			Col6a1	KO < WT	0.702	-0.0992	collagen alpha-1(VI) chain precursor [Mus musculus]	Collagen alpha-1(VI) chain; Collagen VI acts as a cell-binding protein; Belongs to the type VI collagen family.
		YES	Vim	KO < WT	0.703	-0.169	vimentin [Mus musculus]	Vimentin; Vimentins are class-III intermediate filaments found in various non-epithelial cells, especially mesenchymal cells. Vimentin is attached to the nucleus, endoplasmic reticulum, and mitochondria, either laterally or terminally.
			Gsn	KO < WT	0.707	-0.0906	PREDICTED: gelsolin isoform X3 [Mus musculus]; gelsolin isoform 1 precursor [Mus musculus]; PREDICTED: gelsolin isoform X1 [Mus musculus]; PREDICTED: gelsolin isoform X2 [Mus musculus]	Actin-depolymerizing factor; Calcium-regulated, actin-modulating protein that binds to the plus (or barbed) ends of actin monomers or filaments, preventing monomer exchange (end-blocking or capping). It can promote the assembly of monomers into filaments (nucleation) as well as sever filaments already formed. Plays a role in ciliogenesis; Gelsolin/villins
		YES	Epb41	KO > WT	0.725	0.098	PREDICTED: protein 4.1 isoform X2 [Mus musculus]; PREDICTED: protein 4.1 isoform X10 [Mus musculus]; PREDICTED: protein 4.1 isoform X7 [Mus musculus]; PREDICTED: protein 4.1 isoform X24 [Mus musculus]; PREDICTED: protein 4.1 isoform X19 [Mus musculus]	Erythrocyte membrane protein band 4.1; Protein 4.1 is a major structural element of the erythrocyte membrane skeleton. It plays a key role in regulating membrane physical properties of mechanical stability and deformability by stabilizing spectrin-actin interaction. Recruits DLG1 to membranes. Required for dynein-dynactin complex and NUMA1 recruitment at the mitotic cell cortex during anaphase.
			2210010C04Rik	KO > WT	0.726	0.127	trypsinogen 7 precursor [Mus musculus]
YES (Dittmer 2013)			Lamb1	KO < WT	0.73	-0.0704	laminin subunit beta-1 [Mus musculus]; PREDICTED: laminin subunit beta-1 isoform X1 [Mus musculus]	Laminin-10 subunit beta; Binding to cells via a high affinity receptor, laminin is thought to mediate the attachment, migration and organization of cells into tissues during embryonic development by interacting with other extracellular matrix components. Involved in the organization of the laminar architecture of cerebral cortex. It is probably required for the integrity of the basement membrane/…
		YES	Lmo7	KO < WT	0.733	-0.0822	PREDICTED: LIM domain only protein 7 isoform X5 [Mus musculus]; PREDICTED: LIM domain only protein 7 isoform X13 [Mus musculus]; PREDICTED: LIM domain only protein 7 isoform X1 [Mus musculus]; PREDICTED: LIM domain only protein 7 isoform X12 [Mus musculus]; PREDICTED: LIM domain only protein 7 isoform X14 [Mus musculus]; PREDICTED: LIM domain only protein 7 isoform X6 [Mus musculus]; PREDICTED: L…	LIM domain only protein 7; LIM domain containing
			Col6a2	KO < WT	0.738	-0.0786	collagen alpha-2(VI) chain isoform 1 precursor [Mus musculus]; collagen alpha-2(VI) chain isoform 2 precursor [Mus musculus]	Collagen alpha-2(VI) chain; Collagen VI acts as a cell-binding protein; Collagens
YES (Zastrow 2006)		YES	Ttn	KO > WT	0.738	0.0758	titin isoform N2-A [Mus musculus]; titin isoform N2-B [Mus musculus]	Rhabdomyosarcoma antigen MU-RMS-40.14; Key component in the assembly and functioning of vertebrate striated muscles. By providing connections at the level of individual microfilaments, it contributes to the fine balance of forces between the two halves of the sarcomere. The size and extensibility of the cross-links are the main determinants of sarcomere extensibility properties of muscle. In non-…
YES (Dittmer 2013)			Plcb4	KO < WT	0.74	-0.121	PREDICTED: 1-phosphatidylinositol 4,5-bisphosphate phosphodiesterase beta-4 isoform X5 [Mus musculus]; PREDICTED: 1-phosphatidylinositol 4,5-bisphosphate phosphodiesterase beta-4 isoform X8 [Mus musculus]; PREDICTED: 1-phosphatidylinositol 4,5-bisphosphate phosphodiesterase beta-4 isoform X14 [Mus musculus]; PREDICTED: 1-phosphatidylinositol 4,5-bisphosphate phosphodiesterase beta-4 isoform X6 [M…	1-phosphatidylinositol 4,5-bisphosphate phosphodiesterase beta-4; The production of the second messenger molecules diacylglycerol (DAG) and inositol 1,4,5-trisphosphate (IP3) is mediated by activated phosphatidylinositol-specific phospholipase C enzymes. This form has a role in retina signal transduction; C2 domain containing phospholipases
	Yes??		Dtna	KO < WT	0.74	-0.143	PREDICTED: dystrobrevin alpha isoform X8 [Mus musculus]; dystrobrevin alpha isoform a [Mus musculus]; PREDICTED: dystrobrevin alpha isoform X1 [Mus musculus]; PREDICTED: dystrobrevin alpha isoform X2 [Mus musculus]; PREDICTED: dystrobrevin alpha isoform X13 [Mus musculus]; dystrobrevin alpha isoform e [Mus musculus]; PREDICTED: dystrobrevin alpha isoform X7 [Mus musculus]	Dystrophin-related protein 3; May be involved in the formation and stability of synapses as well as being involved in the clustering of nicotinic acetylcholine receptors; Belongs to the dystrophin family. Dystrobrevin subfamily.
			Capzb	KO > WT	0.752	0.076	PREDICTED: F-actin-capping protein subunit beta isoform X1 [Mus musculus]; F-actin-capping protein subunit beta isoform a [Mus musculus]	Capping protein (actin filament) muscle Z-line, beta; F-actin-capping proteins bind in a Ca(2+)-independent manner to the fast growing ends of actin filaments (barbed end) thereby blocking the exchange of subunits at these ends. Unlike other capping proteins (such as gelsolin and severin), these proteins do not sever actin filaments. Plays a role in the regulation of cell morphology and cytoskele…
		YES	Sh3d21	KO > WT	0.752	0.128	PREDICTED: SH3 domain-containing protein 21 isoform X1 [Mus musculus]; PREDICTED: SH3 domain-containing protein 21 isoform X2 [Mus musculus]	SH3 domain containing 21
			Trim72	KO > WT	0.757	0.0765	PREDICTED: tripartite motif-containing protein 72 isoform X2 [Mus musculus]; PREDICTED: tripartite motif-containing protein 72 isoform X1 [Mus musculus]	Tripartite motif containing 72, E3 ubiquitin protein ligase; Muscle-specific protein that plays a central role in cell membrane repair by nucleating the assembly of the repair machinery at injury sites. Specifically binds phosphatidylserine. Acts as a sensor of oxidation: upon membrane damage, entry of extracellular oxidative environment results in disulfide bond formation and homooligomerization…
			Slc25a4	KO > WT	0.759	0.0282	ADP/ATP translocase 1 [Mus musculus]; ADP/ATP translocase 2 [Mus musculus]	Solute carrier family 25 (mitochondrial carrier; adenine nucleotide translocator), member 4; Involved in mitochondrial ADP/ATP transport. Catalyzes the exchange of cytoplasmic ADP with mitochondrial ATP across the mitochondrial inner membrane; Belongs to the mitochondrial carrier (TC 2.A.29) family.
		YES	H2afx	KO > WT	0.76	0.121	histone H2A type 2-C [Mus musculus]; histone H2A type 3 [Mus musculus]; histone H2A type 2-B [Mus musculus]; histone H2A type 1-G [Mus musculus]; histone H2A type 1-F [Mus musculus]; histone cluster 1, H2aa [Mus musculus]; histone H2A.J [Mus musculus]; histone H2AX [Mus musculus]; histone H2A type 1-K [Mus musculus]; histone H2A type 1-H [Mus musculus]; histone H2A type 2-A [Mus musculus]	H2A histone family, member X; Variant histone H2A which replaces conventional H2A in a subset of nucleosomes. Nucleosomes wrap and compact DNA into chromatin, limiting DNA accessibility to the cellular machineries which require DNA as a template. Histones thereby play a central role in transcription regulation, DNA repair, DNA replication and chromosomal stability. DNA accessibility is regulated …
		YES	Setd2	KO > WT	0.775	0.196	PREDICTED: histone-lysine N-methyltransferase SETD2 isoform X1 [Mus musculus]; PREDICTED: histone-lysine N-methyltransferase SETD2 isoform X5 [Mus musculus]; PREDICTED: histone-lysine N-methyltransferase SETD2 isoform X4 [Mus musculus]; PREDICTED: histone-lysine N-methyltransferase SETD2 isoform X3 [Mus musculus]; PREDICTED: histone-lysine N-methyltransferase SETD2 isoform X2 [Mus musculus]; hist…	Histone-lysine N-methyltransferase SETD2; Histone methyltransferase that specifically trimethylates 'Lys-36' of histone H3 (H3K36me3) using dimethylated 'Lys-36' (H3K36me2) as substrate. Represents the main enzyme generating H3K36me3, a specific tag for epigenetic transcriptional activation (By similarity). Plays a role in chromatin structure modulation during elongation by coordinating recruitme…
		YES	Svil	KO < WT	0.784	-0.104	PREDICTED: supervillin isoform X8 [Mus musculus]; PREDICTED: supervillin isoform X7 [Mus musculus]; PREDICTED: supervillin isoform X2 [Mus musculus]; PREDICTED: supervillin isoform X10 [Mus musculus]; PREDICTED: supervillin isoform X9 [Mus musculus]; PREDICTED: supervillin isoform X1 [Mus musculus]; PREDICTED: supervillin isoform X11 [Mus musculus]; PREDICTED: supervillin isoform X5 [Mus musculus…	Supervillin; Isoform 1: Forms a high-affinity link between the actin cytoskeleton and the membrane. Is among the first costameric proteins to assemble during myogenesis and it contributes to myogenic membrane structure and differentiation. Appears to be involved in myosin II assembly. May modulate myosin II regulation through MLCK during cell spreading, an initial step in cell migration. May play…
		YES	Kiaa2018	KO > WT	0.787	0.0614	PREDICTED: basic helix-loop-helix domain-containing protein USF3 isoform X1 [Mus musculus]	Basic helix-loop-helix domain-containing protein USF3; Involved in the negative regulation of epithelial- mesenchymal transition, the process by which epithelial cells lose their polarity and adhesion properties to become mesenchymal cells with enhanced migration and invasive properties.
			Plbd2	KO > WT	0.788	0.101	putative phospholipase B-like 2 precursor [Mus musculus]	Phospholipase B domain-containing protein 2; Putative phospholipase.
			Hsd17b10	KO > WT	0.788	0.0619	3-hydroxyacyl-CoA dehydrogenase type-2 [Mus musculus]	Endoplasmic reticulum-associated amyloid beta-peptide-binding protein; Mitochondrial dehydrogenase that catalyzes the beta- oxidation at position 17 of androgens and estrogens and has 3- alpha-hydroxysteroid dehydrogenase activity with androsterone. Catalyzes the third step in the beta-oxidation of fatty acids. Carries out oxidative conversions of 7-alpha-OH and 7-beta-OH bile acids. Also exhibit…
			Tgm2	KO < WT	0.794	-0.0807	protein-glutamine gamma-glutamyltransferase 2 [Mus musculus]	Protein-glutamine gamma-glutamyltransferase 2; Catalyzes the cross-linking of proteins and the conjugation of polyamines to proteins; Transglutaminases
			Syt17	KO < WT	0.795	-0.0713	PREDICTED: synaptotagmin-17 isoform X1 [Mus musculus]	Synaptotagmin XVII; Plays a role in dendrite formation by melanocytes; Belongs to the synaptotagmin family.
			Myh11	KO > WT	0.799	0.0624	myosin-11 isoform 1 [Mus musculus]; PREDICTED: myosin-11 isoform X3 [Mus musculus]; PREDICTED: myosin-11 isoform X1 [Mus musculus]; PREDICTED: myosin-11 isoform X2 [Mus musculus]; myosin-11 isoform 2 [Mus musculus]	Myosin heavy chain, smooth muscle isoform; Muscle contraction; Belongs to the TRAFAC class myosin-kinesin ATPase superfamily. Myosin family.
		YES	Sptbn1	KO < WT	0.804	-0.0754	PREDICTED: spectrin beta chain, non-erythrocytic 1 isoform X2 [Mus musculus]; PREDICTED: spectrin beta chain, non-erythrocytic 1 isoform X1 [Mus musculus]; spectrin beta chain, non-erythrocytic 1 isoform 2 [Mus musculus]	Spectrin beta chain, non-erythrocytic 1; Fodrin, which seems to be involved in secretion, interacts with calmodulin in a calcium-dependent manner and is thus candidate for the calcium-dependent movement of the cytoskeleton at the membrane; Pleckstrin homology domain containing
			Atad3a	KO > WT	0.805	0.0318	PREDICTED: ATPase family AAA domain-containing protein 3 isoform X1 [Mus musculus]; ATPase family AAA domain-containing protein 3 [Mus musculus]	ATPase family AAA domain-containing protein 3A; Essential for mitochondrial network organization, mitochondrial metabolism and cell growth at organism and cellular level. May play an important role in mitochondrial protein synthesis. May also participate in mitochondrial DNA replication. May bind to mitochondrial DNA D-loops and contribute to nucleoid stability. Required for enhanced channeling o…
			Taok1	KO > WT	0.808	0.0954	PREDICTED: serine/threonine-protein kinase TAO1 isoform X2 [Mus musculus]; PREDICTED: serine/threonine-protein kinase TAO1 isoform X1 [Mus musculus]	Thousand and one amino acid protein kinase 1; Serine/threonine-protein kinase involved in various processes such as p38/MAPK14 stress-activated MAPK cascade, DNA damage response and regulation of cytoskeleton stability. Phosphorylates MAP2K3, MAP2K6 and MARK2. Acts as an activator of the p38/MAPK14 stress-activated MAPK cascade by mediating phosphorylation and subsequent activation of the upstrea…
		YES	Pabpc4	KO < WT	0.809	-0.125	PREDICTED: polyadenylate-binding protein 4 isoform X1 [Mus musculus]; PREDICTED: polyadenylate-binding protein 4 isoform X4 [Mus musculus]; polyadenylate-binding protein 4 isoform 2 [Mus musculus]; PREDICTED: polyadenylate-binding protein 4 isoform X3 [Mus musculus]; PREDICTED: polyadenylate-binding protein 4 isoform X5 [Mus musculus]; PREDICTED: polyadenylate-binding protein 4 isoform X6 [Mus mu…	poly(A) binding protein, cytoplasmic 4 (inducible form); Binds the poly(A) tail of mRNA. May be involved in cytoplasmic regulatory processes of mRNA metabolism. Can probably bind to cytoplasmic RNA sequences other than poly(A) in vivo (By similarity); RNA binding motif containing
		YES	Prdx1	KO < WT	0.82	-0.0458	peroxiredoxin-1 [Mus musculus]	Thioredoxin-dependent peroxide reductase 2; Thiol-specific peroxidase that catalyzes the reduction of hydrogen peroxide and organic hydroperoxides to water and alcohols, respectively. Plays a role in cell protection against oxidative stress by detoxifying peroxides and as sensor of hydrogen peroxide-mediated signaling events. Might participate in the signaling cascades of growth factors and tumor…
		YES	Eno1	KO > WT	0.821	0.0368	PREDICTED: alpha-enolase isoform X1 [Mus musculus]; PREDICTED: alpha-enolase isoform X2 [Mus musculus]	2-phospho-D-glycerate hydro-lyase; Multifunctional enzyme that, as well as its role in glycolysis, plays a part in various processes such as growth control, hypoxia tolerance and allergic responses. May also function in the intravascular and pericellular fibrinolytic system due to its ability to serve as a receptor and activator of plasminogen on the cell surface of several cell-types such as leu…
		YES	Epb41	KO < WT	0.823	-0.045	PREDICTED: protein 4.1 isoform X1 [Mus musculus]; PREDICTED: protein 4.1 isoform X22 [Mus musculus]; PREDICTED: protein 4.1 isoform X9 [Mus musculus]; protein 4.1 isoform 2 [Mus musculus]; PREDICTED: protein 4.1 isoform X21 [Mus musculus]; PREDICTED: protein 4.1 isoform X4 [Mus musculus]; PREDICTED: protein 4.1 isoform X20 [Mus musculus]; PREDICTED: protein 4.1 isoform X15 [Mus musculus]; PREDICT…	Erythrocyte membrane protein band 4.1; Protein 4.1 is a major structural element of the erythrocyte membrane skeleton. It plays a key role in regulating membrane physical properties of mechanical stability and deformability by stabilizing spectrin-actin interaction. Recruits DLG1 to membranes. Required for dynein-dynactin complex and NUMA1 recruitment at the mitotic cell cortex during anaphase.
			Hpx	KO < WT	0.823	-0.0929	hemopexin precursor [Mus musculus]	Beta-1B-glycoprotein; Binds heme and transports it to the liver for breakdown and iron recovery, after which the free hemopexin returns to the circulation.
		YES	Lama2	KO < WT	0.827	-0.0382	PREDICTED: laminin subunit alpha-2 isoform X3 [Mus musculus]; PREDICTED: laminin subunit alpha-2 isoform X1 [Mus musculus]; laminin subunit alpha-2 precursor [Mus musculus]; PREDICTED: laminin subunit alpha-2 isoform X2 [Mus musculus]	Laminin-12 subunit alpha; Binding to cells via a high affinity receptor, laminin is thought to mediate the attachment, migration and organization of cells into tissues during embryonic development by interacting with other extracellular matrix components.
			Sec31a	KO > WT	0.837	0.0729	PREDICTED: protein transport protein Sec31A isoform X1 [Mus musculus]; protein transport protein Sec31A [Mus musculus]; PREDICTED: protein transport protein Sec31A isoform X11 [Mus musculus]; PREDICTED: protein transport protein Sec31A isoform X7 [Mus musculus]; PREDICTED: protein transport protein Sec31A isoform X9 [Mus musculus]; PREDICTED: protein transport protein Sec31A isoform X2 [Mus muscu…	Protein transport protein Sec31A; Component of the coat protein complex II (COPII) which promotes the formation of transport vesicles from the endoplasmic reticulum (ER). The coat has two main functions, the physical deformation of the endoplasmic reticulum membrane into vesicles and the selection of cargo molecules (By similarity); WD repeat domain containing
			Actn2	KO < WT	0.844	-0.089	PREDICTED: alpha-actinin-1 isoform X3 [Mus musculus]; PREDICTED: alpha-actinin-1 isoform X1 [Mus musculus]; PREDICTED: alpha-actinin-1 isoform X4 [Mus musculus]; alpha-actinin-1 isoform 2 [Mus musculus]; PREDICTED: alpha-actinin-1 isoform X7 [Mus musculus]; alpha-actinin-2 [Mus musculus]; PREDICTED: alpha-actinin-2 isoform X1 [Mus musculus]; PREDICTED: alpha-actinin-1 isoform X2 [Mus musculus]; P…	Alpha-actinin skeletal muscle isoform 2; F-actin cross-linking protein which is thought to anchor actin to a variety of intracellular structures. This is a bundling protein; Actinins
			Col1a1	KO < WT	0.845	-0.0928	collagen alpha-1(I) chain preproprotein [Mus musculus]	Collagen alpha-1(I) chain; Type I collagen is a member of group I collagen (fibrillar forming collagen); Collagens
			Col4a2	KO < WT	0.852	-0.0292	collagen alpha-2(IV) chain precursor [Mus musculus]	Collagen alpha-2(IV) chain; Type IV collagen is the major structural component of glomerular basement membranes (GBM), forming a 'chicken-wire' meshwork together with laminins, proteoglycans and entactin/nidogen.
		YES	Slc25a5	KO > WT	0.858	0.019	ADP/ATP translocase 2 [Mus musculus]	Solute carrier family 25 (mitochondrial carrier; adenine nucleotide translocator), member 5; Catalyzes the exchange of cytoplasmic ADP with mitochondrial ATP across the mitochondrial inner membrane. As part of the mitotic spindle-associated MMXD complex it may play a role in chromosome segregation; Solute carriers
			Olfr1145	KO > WT	0.86	0.0757	olfactory receptor 1145 [Mus musculus]
		YES	Cand2	KO < WT	0.862	-0.0168	cullin-associated NEDD8-dissociated protein 2 [Mus musculus]	Cullin-associated and neddylation-dissociated 2 (putative); Probable assembly factor of SCF (SKP1-CUL1-F-box protein) E3 ubiquitin ligase complexes that promotes the exchange of the substrate-recognition F-box subunit in SCF complexes, thereby playing a key role in the cellular repertoire of SCF complexes; Belongs to the CAND family.
			Myh14	KO > WT	0.87	0.0348	PREDICTED: myosin-14 isoform X1 [Mus musculus]; PREDICTED: myosin-14 isoform X2 [Mus musculus]; myosin-14 isoform 1 [Mus musculus]	Myosin heavy chain, non-muscle IIc; Cellular myosin that appears to play a role in cytokinesis, cell shape, and specialized functions such as secretion and capping; Deafness associated genes
			Eef1a2	KO > WT	0.89	0.027	elongation factor 1-alpha 2 [Mus musculus]	Eukaryotic translation elongation factor 1 alpha 2; This protein promotes the GTP-dependent binding of aminoacyl-tRNA to the A-site of ribosomes during protein biosynthesis; Belongs to the TRAFAC class translation factor GTPase superfamily. Classic translation factor GTPase family. EF-Tu/EF-1A subfamily.
			Hbb-bs	KO < WT	0.894	-0.0533	hemoglobin subunit beta-1 [Mus musculus]; hemoglobin, beta adult s chain [Mus musculus]; hemoglobin subunit beta-2 [Mus musculus]
		YES	Dctn1	KO < WT	0.896	-0.0296	PREDICTED: dynactin subunit 1 isoform X4 [Mus musculus]; PREDICTED: dynactin subunit 1 isoform X10 [Mus musculus]; dynactin subunit 1 isoform 3 [Mus musculus]; PREDICTED: dynactin subunit 1 isoform X9 [Mus musculus]; PREDICTED: dynactin subunit 1 isoform X11 [Mus musculus]; PREDICTED: dynactin subunit 1 isoform X3 [Mus musculus]; PREDICTED: dynactin subunit 1 isoform X5 [Mus musculus]; dynactin s…	150 kDa dynein-associated polypeptide; Plays a key role in dynein-mediated retrograde transport of vesicles and organelles along microtubules by recruiting and tethering dynein to microtubules. Binds to both dynein and microtubules providing a link between specific cargos, microtubules and dynein. Essential for targeting dynein to microtubule plus ends, recruiting dynein to membranous cargos and …
			Ablim1	KO > WT	0.897	0.0286	PREDICTED: actin-binding LIM protein 1 isoform X5 [Mus musculus]; actin-binding LIM protein 1 isoform 6 [Mus musculus]; PREDICTED: actin-binding LIM protein 1 isoform X1 [Mus musculus]; PREDICTED: actin-binding LIM protein 1 isoform X7 [Mus musculus]; PREDICTED: actin-binding LIM protein 1 isoform X6 [Mus musculus]; PREDICTED: actin-binding LIM protein 1 isoform X12 [Mus musculus]; PREDICTED: act…	Actin-binding LIM protein family member 1; May act as scaffold protein (By similarity). May play a role in the development of the retina. Has been suggested to play a role in axon guidance; LIM domain containing
			Slc25a4	KO < WT	0.906	-0.0106	ADP/ATP translocase 1 [Mus musculus]	Solute carrier family 25 (mitochondrial carrier; adenine nucleotide translocator), member 4; Involved in mitochondrial ADP/ATP transport. Catalyzes the exchange of cytoplasmic ADP with mitochondrial ATP across the mitochondrial inner membrane; Belongs to the mitochondrial carrier (TC 2.A.29) family.
			Tnnt2	KO > WT	0.915	0.0178	troponin T, cardiac muscle isoform c [Mus musculus]; troponin T, cardiac muscle isoform h [Mus musculus]; troponin T, cardiac muscle isoform i [Mus musculus]; troponin T, cardiac muscle isoform g [Mus musculus]; PREDICTED: troponin T, cardiac muscle isoform X3 [Mus musculus]; PREDICTED: troponin T, cardiac muscle isoform X6 [Mus musculus]; PREDICTED: troponin T, cardiac muscle isoform X4 [Mus mus…	Troponin T type 2 (cardiac); Troponin T is the tropomyosin-binding subunit of troponin, the thin filament regulatory complex which confers calcium-sensitivity to striated muscle actomyosin ATPase activity.
		YES	Sgk223	KO < WT	0.917	-0.0225	PREDICTED: tyrosine-protein kinase SgK223 isoform X1 [Mus musculus]	PEAK1-related kinase-activating pseudokinase 1; Tyrosine-protein kinase SgK223
			Tln2	KO < WT	0.92	-0.0371	PREDICTED: talin-2 isoform X1 [Mus musculus]; PREDICTED: talin-2 isoform X3 [Mus musculus]; PREDICTED: talin-2 isoform X2 [Mus musculus]; PREDICTED: talin-2 isoform X4 [Mus musculus]; talin-2 [Mus musculus]	Talin 2; As a major component of focal adhesion plaques that links integrin to the actin cytoskeleton, may play an important role in cell adhesion. Recruits PIP5K1C to focal adhesion plaques and strongly activates its kinase activity (By similarity); FERM domain containing
		YES	Mad1l1	KO > WT	0.926	0.0116	PREDICTED: mitotic spindle assembly checkpoint protein MAD1 isoform X1 [Mus musculus]; PREDICTED: mitotic spindle assembly checkpoint protein MAD1 isoform X2 [Mus musculus]	Mitotic spindle assembly checkpoint protein MAD1; Component of the spindle-assembly checkpoint that prevents the onset of anaphase until all chromosomes are properly aligned at the metaphase plate. May recruit MAD2L1 to unattached kinetochores. Has a role in the correct positioning of the septum. Required for anchoring MAD2L1 to the nuclear periphery. Binds to the TERT promoter and represses telo…
			Tuba4a	KO < WT	0.929	-0.0231	PREDICTED: tubulin alpha-4A chain isoform X1 [Mus musculus]; tubulin alpha-4A chain isoform 1 [Mus musculus]	Testis-specific alpha-tubulin; Tubulin is the major constituent of microtubules. It binds two moles of GTP, one at an exchangeable site on the beta chain and one at a non-exchangeable site on the alpha chain; Tubulins
		YES	Synpo2	KO > WT	0.929	0.0382	PREDICTED: synaptopodin-2 isoform X1 [Mus musculus]; synaptopodin-2 [Mus musculus]	Synaptopodin 2; Isoform 4: Can induce long, well-organized actin bundles frequently orientated in parallel along the long axis of the cell showing characteristics of contractile ventral stress fibers; Belongs to the synaptopodin family.
			Myl4	KO > WT	0.931	0.477	PREDICTED: myosin light chain 4 isoform X2 [Mus musculus]; PREDICTED: myosin light chain 4 isoform X1 [Mus musculus]	Myosin light chain 1, embryonic muscle/atrial isoform; Regulatory light chain of myosin. Does not bind calcium; EF-hand domain containing
			Prph	KO > WT	0.94	0.0128	peripherin isoform 3 [Mus musculus]; PREDICTED: peripherin isoform X2 [Mus musculus]; PREDICTED: peripherin isoform X1 [Mus musculus]; peripherin isoform 2 [Mus musculus]	Neurofilament 4; Class-III neuronal intermediate filament protein.
			Gys1	KO > WT	0.948	0.888	glycogen [starch] synthase, muscle [Mus musculus]	Glycogen [starch] synthase, muscle; Transfers the glycosyl residue from UDP-Glc to the non- reducing end of alpha-1,4-glucan; Glycosyl transferases group 1 domain containing
			Myoz2	KO > WT	0.95	0.0146	PREDICTED: myozenin-2 isoform X1 [Mus musculus]; myozenin-2 [Mus musculus]	FATZ-related protein 2; Myozenins may serve as intracellular binding proteins involved in linking Z line proteins such as alpha-actinin, gamma- filamin, TCAP/telethonin, LDB3/ZASP and localizing calcineurin signaling to the sarcomere. Plays an important role in the modulation of calcineurin signaling. May play a role in myofibrillogenesis.
		YES	Flna	KO < WT	0.951	-0.349	PREDICTED: filamin-A isoform X1 [Mus musculus]; filamin-C isoform 2 [Mus musculus]; filamin-C isoform 1 [Mus musculus]; PREDICTED: filamin-A isoform X2 [Mus musculus]	Endothelial actin-binding protein; Promotes orthogonal branching of actin filaments and links actin filaments to membrane glycoproteins. Anchors various transmembrane proteins to the actin cytoskeleton and serves as a scaffold for a wide range of cytoplasmic signaling proteins. Interaction with FLNA may allow neuroblast migration from the ventricular zone into the cortical plate. Tethers cell sur…
			Sptan1	KO > WT	0.959	0.011	PREDICTED: spectrin alpha chain, non-erythrocytic 1 isoform X2 [Mus musculus]; PREDICTED: spectrin alpha chain, non-erythrocytic 1 isoform X5 [Mus musculus]; PREDICTED: spectrin alpha chain, non-erythrocytic 1 isoform X6 [Mus musculus]; PREDICTED: spectrin alpha chain, non-erythrocytic 1 isoform X4 [Mus musculus]; spectrin alpha chain, non-erythrocytic 1 isoform 4 [Mus musculus]; PREDICTED: spect…	Spectrin alpha chain, non-erythrocytic 1; Fodrin, which seems to be involved in secretion, interacts with calmodulin in a calcium-dependent manner and is thus candidate for the calcium-dependent movement of the cytoskeleton at the membrane; EF-hand domain containing
			Fbn1	KO < WT	0.962	-0.0162	PREDICTED: fibrillin-1 isoform X2 [Mus musculus]; PREDICTED: fibrillin-1 isoform X1 [Mus musculus]	Fibrillin 1; Fibrillin-1: Structural component of the 10-12 nm diameter microfibrils of the extracellular matrix, which conveys both structural and regulatory properties to load-bearing connective tissues. Fibrillin-1- containing microfibrils provide long-term force bearing structural support. In tissues such as the lung, blood vessels and skin, microfibrils form the periphery of the elastic fibe…
		YES	Tpi1	KO > WT	0.971	0.0076	triosephosphate isomerase [Mus musculus]	Triosephosphate isomerase 1; Belongs to the triosephosphate isomerase family.
			Tex13a	KO > WT	0.987	0.177	PREDICTED: testis-expressed sequence 13A protein isoform X2 [Mus musculus]; PREDICTED: testis-expressed sequence 13A protein isoform X1 [Mus musculus]; testis-expressed sequence 13A protein [Mus musculus]	Testis-expressed protein 13A; Zinc fingers RANBP2-type ; Belongs to the TEX13 family.
			Map7d1	KO > WT	0.992	0.103	MAP7 domain-containing protein 1 isoform 2 [Mus musculus]; PREDICTED: MAP7 domain-containing protein 1 isoform X3 [Mus musculus]; MAP7 domain-containing protein 1 isoform 1 [Mus musculus]; PREDICTED: MAP7 domain-containing protein 1 isoform X5 [Mus musculus]; PREDICTED: MAP7 domain-containing protein 1 isoform X1 [Mus musculus]; PREDICTED: MAP7 domain-containing protein 1 isoform X4 [Mus musculus…	Arginine/proline-rich coiled-coil domain-containing protein 1; MAP7 domain containing 1; Belongs to the MAP7 family.
			Mb	KO < WT	0.993	-0.00219	myoglobin [Mus musculus]	Myoglobin; Serves as a reserve supply of oxygen and facilitates the movement of oxygen within muscles.
YES (Ahmady 2011)		YES	Mlip	KO > WT	0.997	0.0402	PREDICTED: muscular LMNA-interacting protein isoform X31 [Mus musculus]; PREDICTED: muscular LMNA-interacting protein isoform X25 [Mus musculus]; PREDICTED: muscular LMNA-interacting protein isoform X27 [Mus musculus]; PREDICTED: muscular LMNA-interacting protein isoform X19 [Mus musculus]; PREDICTED: muscular LMNA-interacting protein isoform X8 [Mus musculus]; PREDICTED: muscular LMNA-interactin…	Muscular-enriched A-type laminin-interacting protein; Required for precocious cardiac adaptation to stress through integrated regulation of the AKT/mTOR pathways and FOXO1. Regulates cardiac homeostasis and plays an important role in protection against cardiac hypertrophy. Acts as a transcriptional cofactor, represses transactivator activity of ISL1 and MYOCD.
			Vcl	KO > WT	0.997	0.0004	vinculin [Mus musculus]; PREDICTED: vinculin isoform X1 [Mus musculus]	Metavinculin; Actin filament (F-actin)-binding protein involved in cell-matrix adhesion and cell-cell adhesion. Regulates cell- surface E-cadherin expression and potentiates mechanosensing by the E-cadherin complex. May also play important roles in cell morphology and locomotion; Belongs to the vinculin/alpha-catenin family.
			Idh1	KO > WT	0.998	0.0004	isocitrate dehydrogenase [NADP] cytoplasmic [Mus musculus]	Isocitrate dehydrogenase 1, cytosolic
			Sptan1	KO < WT	0.998	-0.000399	PREDICTED: spectrin alpha chain, non-erythrocytic 1 isoform X2 [Mus musculus]; PREDICTED: spectrin alpha chain, non-erythrocytic 1 isoform X5 [Mus musculus]; PREDICTED: spectrin alpha chain, non-erythrocytic 1 isoform X6 [Mus musculus]; PREDICTED: spectrin alpha chain, non-erythrocytic 1 isoform X4 [Mus musculus]; spectrin alpha chain, non-erythrocytic 1 isoform 4 [Mus musculus]; PREDICTED: spect…	Spectrin alpha chain, non-erythrocytic 1; Fodrin, which seems to be involved in secretion, interacts with calmodulin in a calcium-dependent manner and is thus candidate for the calcium-dependent movement of the cytoskeleton at the membrane; EF-hand domain containing

## Sheet: MUSCLE-List
Reported intxn?	NET?	Nucleus?	gene_names	sign	p-value	log2.foldchange	Protein	Description
			Capn1	KO < WT	0.00319	-0.513	calpain-1 catalytic subunit [Mus musculus]	Cell proliferation-inducing gene 30 protein; Calcium-regulated non-lysosomal thiol-protease which catalyzes limited proteolysis of substrates involved in cytoskeletal remodeling and signal transduction; Belongs to the peptidase C2 family.
		YES	Mylk2	KO < WT	0.00771	-0.576	myosin light chain kinase 2, skeletal/cardiac muscle [Mus musculus]	Myosin light chain kinase 2, skeletal/cardiac muscle; Implicated in the level of global muscle contraction and cardiac function. Phosphorylates a specific serine in the N- terminus of a myosin light chain.
			Mthfd1	KO < WT	0.0122	-0.793	C-1-tetrahydrofolate synthase, cytoplasmic [Mus musculus]	C-1-tetrahydrofolate synthase, cytoplasmic; Methylenetetrahydrofolate dehydrogenase, cyclohydrolase and formyltetrahydrofolate synthetase 1; In the N-terminal section; belongs to the tetrahydrofolate dehydrogenase/cyclohydrolase family.
		YES	Actb	KO < WT	0.0157	-0.307	actin, cytoplasmic 1 [Mus musculus]_x000D_ actin, alpha skeletal muscle [Mus musculus]	Actin, cytoplasmic 1; Actins are highly conserved proteins that are involved in various types of cell motility and are ubiquitously expressed in all eukaryotic cells.
			Eprs1	KO < WT	0.0181	-0.465	PREDICTED: bifunctional glutamate/proline--tRNA ligase isoform X1 [Mus musculus]
			Capn2	KO < WT	0.0184	-0.506	calpain-2 catalytic subunit [Mus musculus]	Calcium-activated neutral proteinase 2; Calcium-regulated non-lysosomal thiol-protease which catalyzes limited proteolysis of substrates involved in cytoskeletal remodeling and signal transduction. Proteolytically cleaves MYOC at 'Arg-226'. Proteolytically cleaves CPEB3 following neuronal stimulation which abolishes CPEB3 translational repressor activity, leading to translation of CPEB3 target mR…
		YES	Fbp2	KO < WT	0.0206	-1.39	fructose-1,6-bisphosphatase isozyme 2 [Mus musculus]	D-fructose-1,6-bisphosphate 1-phosphohydrolase 2; Catalyzes the hydrolysis of fructose 1,6-bisphosphate to fructose 6-phosphate in the presence of divalent cations and probably participates in glycogen synthesis from carbohydrate precursors, such as lactate; Fructose-1,6-bisphosphatases
		YES	Fabp4	KO > WT	0.0254	0.612	PREDICTED: fatty acid-binding protein, adipocyte isoform X1 [Mus musculus]	Adipocyte-type fatty acid-binding protein; Lipid transport protein in adipocytes. Binds both long chain fatty acids and retinoic acid. Delivers long-chain fatty acids and retinoic acid to their cognate receptors in the nucleus (By similarity); Belongs to the calycin superfamily. Fatty-acid binding protein (FABP) family.
		YES	Hnrnpk	KO < WT	0.0302	-0.259	PREDICTED: heterogeneous nuclear ribonucleoprotein K isoform X1 [Mus musculus]	Transformation up-regulated nuclear protein; One of the major pre-mRNA-binding proteins. Binds tenaciously to poly(C) sequences. Likely to play a role in the nuclear metabolism of hnRNAs, particularly for pre-mRNAs that contain cytidine-rich sequences. Can also bind poly(C) single- stranded DNA. Plays an important role in p53/TP53 response to DNA damage, acting at the level of both transcription …
			Myh1	KO > WT	0.0306	0.431	PREDICTED: myosin-1 isoform X1 [Mus musculus]_x000D_ myosin-2 [Mus musculus]_x000D_ myosin-13 [Mus musculus]	Myosin, heavy chain 1, skeletal muscle, adult; Muscle contraction; Belongs to the TRAFAC class myosin-kinesin ATPase superfamily. Myosin family.
		YES	Vim	KO > WT	0.0318	0.453	vimentin [Mus musculus]	Vimentin; Vimentins are class-III intermediate filaments found in various non-epithelial cells, especially mesenchymal cells. Vimentin is attached to the nucleus, endoplasmic reticulum, and mitochondria, either laterally or terminally.
		YES	Acot13	KO > WT	0.0328	0.507	acyl-coenzyme A thioesterase 13 [Mus musculus]	Thioesterase superfamily member 2; Acyl-CoA thioesterases are a group of enzymes that catalyze the hydrolysis of acyl-CoAs to the free fatty acid and coenzyme A (CoASH), providing the potential to regulate intracellular levels of acyl-CoAs, free fatty acids and CoASH. Has acyl-CoA thioesterase activity towards medium (C12) and long-chain (C18) fatty acyl-CoA substrates. Can also hydrolyze 3- hydr…
		YES	Lmcd1	KO < WT	0.0334	-0.64	LIM and cysteine-rich domains protein 1 [Mus musculus]	LIM and cysteine-rich domains protein 1; Transcriptional cofactor that restricts GATA6 function by inhibiting DNA-binding, resulting in repression of GATA6 transcriptional activation of downstream target genes. Represses GATA6-mediated trans activation of lung- and cardiac tissue- specific promoters. Inhibits DNA-binding by GATA4 and GATA1 to the cTNC promoter (By similarity). Plays a critical ro…
			Kng1	KO > WT	0.0341	0.328	kininogen-1 isoform 2 precursor [Mus musculus]	Williams-Fitzgerald-Flaujeac factor; (1) Kininogens are inhibitors of thiol proteases; (2) HMW-kininogen plays an important role in blood coagulation by helping to position optimally prekallikrein and factor XI next to factor XII; (3) HMW-kininogen inhibits the thrombin- and plasmin- induced aggregation of thrombocytes; (4) the active peptide bradykinin that is released from HMW-kininogen shows a…
		YES	Ppme1	KO < WT	0.0344	-0.501	protein phosphatase methylesterase 1 [Mus musculus]	Protein phosphatase methylesterase 1; Demethylates proteins that have been reversibly carboxymethylated. Demethylates PPP2CB (in vitro) and PPP2CA. Binding to PPP2CA displaces the manganese ion and inactivates the enzyme; Protein phosphatase 2 modulatory subunits
		YES	Des	KO > WT	0.0365	0.444	desmin [Mus musculus]_x000D_ vimentin [Mus musculus]	Desmin; Muscle-specific type III intermediate filament essential for proper muscular structure and function. Plays a crucial role in maintaining the structure of sarcomeres, inter-connecting the Z-disks and forming the myofibrils, linking them not only to the sarcolemmal cytoskeleton, but also to the nucleus and mitochondria, thus providing strength for the muscle fiber during activity. In adult …
		YES	Ahnak	KO < WT	0.0367	-0.399	PREDICTED: neuroblast differentiation-associated protein AHNAK isoform X3 [Mus musculus]	Neuroblast differentiation-associated protein AHNAK; May be required for neuronal cell differentiation; PDZ domain containing
		YES	Tpi1	KO > WT	0.0373	0.581	triosephosphate isomerase [Mus musculus]	Triosephosphate isomerase 1; Belongs to the triosephosphate isomerase family.
		YES	Fxr1	KO < WT	0.0485	-0.323	fragile X mental retardation syndrome-related protein 1 isoform 1 [Mus musculus]	Fragile X mental retardation syndrome-related protein 1; RNA-binding protein required for embryonic and postnatal development of muscle tissue. May regulate intracellular transport and local translation of certain mRNAs (By similarity); Belongs to the FMR1 family.
			Mb	KO > WT	0.0491	0.563	myoglobin [Mus musculus]	Myoglobin; Serves as a reserve supply of oxygen and facilitates the movement of oxygen within muscles.
		YES	Hnrnpab	KO > WT	0.0494	0.489	heterogeneous nuclear ribonucleoprotein A/B isoform 1 [Mus musculus]	Heterogeneous nuclear ribonucleoprotein A/B; Binds single-stranded RNA. Has a high affinity for G- rich and U-rich regions of hnRNA. Also binds to APOB mRNA transcripts around the RNA editing site; RNA binding motif containing
		YES	Ugp2	KO < WT	0.0515	-0.408	UTP--glucose-1-phosphate uridylyltransferase isoform 2 [Mus musculus]_x000D_ UTP--glucose-1-phosphate uridylyltransferase isoform 1 [Mus musculus]	UTP--glucose-1-phosphate uridylyltransferase; Plays a central role as a glucosyl donor in cellular metabolic pathways; Belongs to the UDPGP type 1 family.
		YES	Vdac3	KO > WT	0.0517	0.477	voltage-dependent anion-selective channel protein 3 isoform 1 [Mus musculus]	Voltage-dependent anion-selective channel protein 3; Forms a channel through the mitochondrial outer membrane that allows diffusion of small hydrophilic molecules; Belongs to the eukaryotic mitochondrial porin family.
		YES	Cavin2	KO > WT	0.0518	0.437	caveolae-associated protein 2 [Mus musculus]	Phosphatidylserine-binding protein; Plays an important role in caveolar biogenesis and morphology. Regulates caveolae morphology by inducing membrane curvature within caveolae. Plays a role in caveola formation in a tissue-specific manner. Required for the formation of caveolae in the lung and fat endothelia but not in the heart endothelia. Negatively regulates the size or stability of CAVIN comp…
		YES	Apobec2	KO > WT	0.0519	0.465	C->U-editing enzyme APOBEC-2 [Mus musculus]	Apolipoprotein B mRNA editing enzyme, catalytic polypeptide-like 2; Probable C to U editing enzyme whose physiological substrate is not yet known. Does not display detectable apoB mRNA editing. Has a low intrinsic cytidine deaminase activity. May play a role in the epigenetic regulation of gene expression through the process of active DNA demethylation.
		YES	Vdac1	KO > WT	0.0627	0.487	PREDICTED: voltage-dependent anion-selective channel protein 1 isoform X1 [Mus musculus]	Voltage-dependent anion-selective channel protein 1; Forms a channel through the mitochondrial outer membrane and also the plasma membrane. The channel at the outer mitochondrial membrane allows diffusion of small hydrophilic molecules; in the plasma membrane it is involved in cell volume regulation and apoptosis. It adopts an open conformation at low or zero membrane potential and a closed confo…
			Klhl40	KO < WT	0.0638	-0.64	kelch-like protein 40 [Mus musculus]	Kelch repeat and BTB domain-containing protein 5; Substrate-specific adapter of a BCR (BTB-CUL3-RBX1) E3 ubiquitin ligase complex that acts as a key regulator of skeletal muscle development. The BCR(KLHL40) complex acts by mediating ubiquitination and degradation of TFDP1, thereby regulating the activity of the E2F:DP transcription factor complex (By similarity). Promotes stabilization of LMOD3 b…
			Ampd1	KO < WT	0.0653	-0.385	PREDICTED: AMP deaminase 1 isoform X1 [Mus musculus]	Adenosine monophosphate deaminase 1; AMP deaminase plays a critical role in energy metabolism; Belongs to the metallo-dependent hydrolases superfamily. Adenosine and AMP deaminases family.
			Ric8a	KO < WT	0.0665	-0.415	synembryn-A [Mus musculus]	RIC8 guanine nucleotide exchange factor A; Guanine nucleotide exchange factor (GEF), which can activate some, but not all, G-alpha proteins. Able to activate GNAI1, GNAO1 and GNAQ, but not GNAS by exchanging bound GDP for free GTP. Involved in regulation of microtubule pulling forces during mitotic movement of chromosomes by stimulating G(i)-alpha protein, possibly leading to release G(i)-alpha-G…
			Dsg1b	KO > WT	0.0733	0.355	desmoglein-1-beta preproprotein [Mus musculus]
			Gpt2	KO < WT	0.0747	-0.238	alanine aminotransferase 2 [Mus musculus]	Glutamic pyruvate transaminase (alanine aminotransferase) 2; Catalyzes the reversible transamination between alanine and 2-oxoglutarate to form pyruvate and glutamate; Belongs to the class-I pyridoxal-phosphate-dependent aminotransferase family. Alanine aminotransferase subfamily.
			Cacnb1	KO < WT	0.0755	-0.297	PREDICTED: voltage-dependent L-type calcium channel subunit beta-1 isoform X1 [Mus musculus]	Voltage-dependent L-type calcium channel subunit beta-1; The beta subunit of voltage-dependent calcium channels contributes to the function of the calcium channel by increasing peak calcium current, shifting the voltage dependencies of activation and inactivation, modulating G protein inhibition and controlling the alpha-1 subunit membrane targeting.
			Slc25a4	KO > WT	0.0789	0.502	ADP/ATP translocase 1 [Mus musculus]	Solute carrier family 25 (mitochondrial carrier; adenine nucleotide translocator), member 4; Involved in mitochondrial ADP/ATP transport. Catalyzes the exchange of cytoplasmic ADP with mitochondrial ATP across the mitochondrial inner membrane; Belongs to the mitochondrial carrier (TC 2.A.29) family.
			Sar1b	KO > WT	0.0796	0.306	GTP-binding protein SAR1b [Mus musculus]	Secretion associated, Ras related GTPase 1B; Involved in transport from the endoplasmic reticulum to the Golgi apparatus. Activated by the guanine nucleotide exchange factor PREB. Involved in the selection of the protein cargo and the assembly of the COPII coat complex; ARF GTPase family
			Col12a1	KO < WT	0.0854	-0.425	PREDICTED: collagen alpha-1(XII) chain isoform X1 [Mus musculus]	Collagen alpha-1(XII) chain; Type XII collagen interacts with type I collagen- containing fibrils, the COL1 domain could be associated with the surface of the fibrils, and the COL2 and NC3 domains may be localized in the perifibrillar matrix; Belongs to the fibril-associated collagens with interrupted helices (FACIT) family.
			Flnc	KO < WT	0.0869	-0.165	filamin-C isoform 1 [Mus musculus]	Actin-binding-like protein; Muscle-specific filamin, which plays a central role in muscle cells, probably by functioning as a large actin-cross- linking protein. May be involved in reorganizing the actin cytoskeleton in response to signaling events, and may also display structural functions at the Z lines in muscle cells. Critical for normal myogenesis and for maintaining the structural integrity…
			Paics	KO < WT	0.0874	-0.385	PREDICTED: multifunctional protein ADE2 isoform X1 [Mus musculus]	Multifunctional protein ADE2; Phosphoribosylaminoimidazole carboxylase and phosphoribosylaminoimidazolesuccinocarboxamide synthase; In the C-terminal section; belongs to the AIR carboxylase family. Class II subfamily.
		YES	Cryab	KO > WT	0.093	0.442	PREDICTED: alpha-crystallin B chain isoform X1 [Mus musculus]	Renal carcinoma antigen NY-REN-27; May contribute to the transparency and refractive index of the lens. Has chaperone-like activity, preventing aggregation of various proteins under a wide range of stress conditions; Small heat shock proteins
			Sms	KO < WT	0.0942	-0.464	PREDICTED: spermine synthase [Mus musculus]	Spermidine aminopropyltransferase; Catalyzes the production of spermine from spermidine and decarboxylated S-adenosylmethionine (dcSAM).
			Myoc	KO < WT	0.0944	-0.468	myocilin precursor [Mus musculus]	Myocilin, trabecular meshwork inducible glucocorticoid response; Secreted glycoprotein regulating the activation of different signaling pathways in adjacent cells to control different processes including cell adhesion, cell-matrix adhesion, cytoskeleton organization and cell migration. Promotes substrate adhesion, spreading and formation of focal contacts. Negatively regulates cell-matrix adhesio…
		YES	Elob	KO > WT	0.0964	0.206	elongin-B [Mus musculus]	Transcription elongation factor B (SIII), polypeptide 2 (18kDa, elongin B); SIII, also known as elongin, is a general transcription elongation factor that increases the RNA polymerase II transcription elongation past template-encoded arresting sites. Subunit A is transcriptionally active and its transcription activity is strongly enhanced by binding to the dimeric complex of the SIII regulatory s…
			Grb14	KO > WT	0.0973	0.483	growth factor receptor-bound protein 14 [Mus musculus]	Growth factor receptor-bound protein 14; Adapter protein which modulates coupling of cell surface receptor kinases with specific signaling pathways. Binds to, and suppresses signals from, the activated insulin receptor (INSR). Potent inhibitor of insulin-stimulated MAPK3 phosphorylation. Plays a critical role regulating PDPK1 membrane translocation in response to insulin stimulation and serves as…
			Stbd1	KO < WT	0.0976	-0.312	starch-binding domain-containing protein 1 [Mus musculus]	Starch-binding domain-containing protein 1; Acts as a cargo receptor for glycogen. Delivers its cargo to an autophagic pathway called glycophagy, resulting in the transport of glycogen to lysosomes.
			Ldb3	KO < WT	0.0982	-0.336	PREDICTED: LIM domain-binding protein 3 isoform X2 [Mus musculus]	LIM domain-binding protein 3; LIM domain containing
		YES	Eif3b	KO < WT	0.0982	-0.438	eukaryotic translation initiation factor 3 subunit B [Mus musculus]	Eukaryotic translation initiation factor 3, subunit B; RNA-binding component of the eukaryotic translation initiation factor 3 (eIF-3) complex, which is required for several steps in the initiation of protein synthesis. The eIF-3 complex associates with the 40S ribosome and facilitates the recruitment of eIF-1, eIF-1A, eIF-2:GTP:methionyl-tRNAi and eIF-5 to form the 43S pre-initiation complex (43…
			Myh1	KO > WT	0.101	0.35	PREDICTED: myosin-1 isoform X1 [Mus musculus]	Myosin, heavy chain 1, skeletal muscle, adult; Muscle contraction; Belongs to the TRAFAC class myosin-kinesin ATPase superfamily. Myosin family.
YES (Roux 2012)		YES	Ncl	KO < WT	0.105	-0.259	nucleolin [Mus musculus]	Protein C23; Nucleolin is the major nucleolar protein of growing eukaryotic cells. It is found associated with intranucleolar chromatin and pre-ribosomal particles. It induces chromatin decondensation by binding to histone H1. It is thought to play a role in pre-rRNA transcription and ribosome assembly. May play a role in the process of transcriptional elongation. Binds RNA oligonucleotides with …
		YES	Ncaph	KO < WT	0.108	-0.658	condensin complex subunit 2 [Mus musculus]	non-SMC condensin I complex, subunit H; Regulatory subunit of the condensin complex, a complex required for conversion of interphase chromatin into mitotic-like condense chromosomes. The condensin complex probably introduces positive supercoils into relaxed DNA in the presence of type I topoisomerases and converts nicked DNA into positive knotted forms in the presence of type II topoisomerases.
			Padi2	KO < WT	0.113	-0.266	PREDICTED: protein-arginine deiminase type-2 isoform X1 [Mus musculus]	Peptidyl arginine deiminase, type II; Catalyzes the deimination of arginine residues of proteins; Peptidyl arginine deiminases
			Mdh1	KO > WT	0.115	0.305	malate dehydrogenase, cytoplasmic isoform Mdh1 [Mus musculus]	Malate dehydrogenase 1, NAD (soluble); Malate dehydrogenase 1; Belongs to the LDH/MDH superfamily. MDH type 2 family.
			Myh1	KO > WT	0.117	0.325	PREDICTED: myosin-1 isoform X1 [Mus musculus]_x000D_ myosin-8 [Mus musculus]	Myosin, heavy chain 1, skeletal muscle, adult; Muscle contraction; Belongs to the TRAFAC class myosin-kinesin ATPase superfamily. Myosin family.
		YES	Faf1	KO < WT	0.121	-0.344	FAS-associated factor 1 [Mus musculus]	Fas (TNFRSF6) associated factor 1; Potentiates but cannot initiate FAS-induced apoptosis; UBX domain containing
		YES	Hsp90aa1	KO < WT	0.121	-0.259	heat shock protein HSP 90-alpha [Mus musculus]	Heat shock protein 90kDa alpha (cytosolic), class A member 1; Molecular chaperone that promotes the maturation, structural maintenance and proper regulation of specific target proteins involved for instance in cell cycle control and signal transduction. Undergoes a functional cycle that is linked to its ATPase activity which is essential for its chaperone activity. This cycle probably induces con…
		YES	Camk2g	KO < WT	0.122	-0.195	PREDICTED: calcium/calmodulin-dependent protein kinase type II subunit gamma isoform X1 [Mus musculus]	Calcium/calmodulin-dependent protein kinase type II subunit gamma; Calcium/calmodulin-dependent protein kinase that functions autonomously after Ca(2+)/calmodulin-binding and autophosphorylation, and is involved in sarcoplsamic reticulum Ca(2+) transport in skeletal muscle and may function in dendritic spine and synapse formation and neuronal plasticity. In slow- twitch muscles, is involved in re…
		YES	Myh9	KO > WT	0.126	8.34	myosin-9 [Mus musculus]	Cellular myosin heavy chain, type A; Cellular myosin that appears to play a role in cytokinesis, cell shape, and specialized functions such as secretion and capping. During cell spreading, plays an important role in cytoskeleton reorganization, focal contacts formation (in the margins but not the central part of spreading cells), and lamellipodial retraction; this function is mechanically antagon…
			Myh1	KO > WT	0.127	0.356	PREDICTED: myosin-1 isoform X1 [Mus musculus]_x000D_ PREDICTED: myosin-3 isoform X1 [Mus musculus]_x000D_ myosin-2 [Mus musculus]_x000D_ myosin-8 [Mus musculus]	Myosin, heavy chain 1, skeletal muscle, adult; Muscle contraction; Belongs to the TRAFAC class myosin-kinesin ATPase superfamily. Myosin family.
		YES	Psmd2	KO < WT	0.13	-16.4	26S proteasome non-ATPase regulatory subunit 2 [Mus musculus]	Proteasome (prosome, macropain) 26S subunit, non-ATPase, 2; Component of the 26S proteasome, a multiprotein complex involved in the ATP-dependent degradation of ubiquitinated proteins. This complex plays a key role in the maintenance of protein homeostasis by removing misfolded or damaged proteins, which could impair cellular functions, and by removing proteins whose functions are no longer requi…
		YES	Synpo2	KO < WT	0.13	-0.402	synaptopodin-2 [Mus musculus]	Synaptopodin 2; Isoform 4: Can induce long, well-organized actin bundles frequently orientated in parallel along the long axis of the cell showing characteristics of contractile ventral stress fibers; Belongs to the synaptopodin family.
			Myl1	KO > WT	0.133	0.612	PREDICTED: myosin light chain 1/3, skeletal muscle isoform isoform X1 [Mus musculus]	Myosin light chain 1/3, skeletal muscle isoform; Regulatory light chain of myosin. Does not bind calcium; EF-hand domain containing
		YES	Dnajb4	KO > WT	0.133	0.35	PREDICTED: dnaJ homolog subfamily B member 4 isoform X1 [Mus musculus]	DnaJ (Hsp40) homolog, subfamily B, member 4; Probable chaperone. Stimulates ATP hydrolysis and the folding of unfolded proteins mediated by HSPA1A/B (in vitro); DNAJ heat shock proteins
			Sar1b	KO > WT	0.134	0.315	PREDICTED: GTP-binding protein SAR1a isoform X1 [Mus musculus]_x000D_ GTP-binding protein SAR1b [Mus musculus]	Secretion associated, Ras related GTPase 1B; Involved in transport from the endoplasmic reticulum to the Golgi apparatus. Activated by the guanine nucleotide exchange factor PREB. Involved in the selection of the protein cargo and the assembly of the COPII coat complex; ARF GTPase family
		YES	Diaph1	KO > WT	0.135	16.2	protein diaphanous homolog 1 isoform 1 [Mus musculus]	Protein diaphanous homolog 1; Acts in a Rho-dependent manner to recruit PFY1 to the membrane. Required for the assembly of F-actin structures, such as actin cables and stress fibers. Nucleates actin filaments. Binds to the barbed end of the actin filament and slows down actin polymerization and depolymerization. Required for cytokinesis, and transcriptional activation of the serum response factor…
		YES	Zbed5	KO < WT	0.135	-0.596	SCAN domain containing 3 [Mus musculus]	Transposon-derived Buster1 transposase-like protein; Zinc finger BED-type containing 5
			Gyg1	KO < WT	0.138	-0.306	PREDICTED: glycogenin-1 isoform X1 [Mus musculus]	Glycogenin 1; Self-glucosylates, via an inter-subunit mechanism, to form an oligosaccharide primer that serves as substrate for glycogen synthase; Glycosyltransferase family 8
			Myl3	KO > WT	0.138	0.748	myosin light chain 3 [Mus musculus]_x000D_ PREDICTED: myosin light chain 1/3, skeletal muscle isoform isoform X1 [Mus musculus]	Myosin light chain 1, slow-twitch muscle B/ventricular isoform; Regulatory light chain of myosin. Does not bind calcium; EF-hand domain containing
			Nrap	KO < WT	0.139	-0.373	PREDICTED: nebulin-related-anchoring protein isoform X1 [Mus musculus]	Nebulin-related anchoring protein; May be involved in anchoring the terminal actin filaments in the myofibril to the membrane and in transmitting tension from the myofibrils to the extracellular matrix; LIM domain containing
YES (Dittmer 2013)		YES	Kpna3	KO < WT	0.14	-0.294	importin subunit alpha-4 [Mus musculus]	Karyopherin alpha 3 (importin alpha 4); Functions in nuclear protein import as an adapter protein for nuclear receptor KPNB1. Binds specifically and directly to substrates containing either a simple or bipartite NLS motif. Docking of the importin/substrate complex to the nuclear pore complex (NPC) is mediated by KPNB1 through binding to nucleoporin FxFG repeats and the complex is subsequently tra…
YES (Roux 2012)		YES	Numa1	KO > WT	0.141	15.9	PREDICTED: nuclear mitotic apparatus protein 1 isoform X1 [Mus musculus]	Nuclear mitotic apparatus protein 1; Microtubule (MT)-binding protein that plays a role in the formation and maintenance of the spindle poles and the alignement and the segregation of chromosomes during mitotic cell division. Functions to tether the minus ends of MTs at the spindle poles, which is critical for the establishment and maintenance of the spindle poles. Plays a role in the establishme…
			Fabp3	KO > WT	0.141	0.327	fatty acid-binding protein, heart [Mus musculus]	Fatty acid binding protein 3, muscle and heart (mammary-derived growth inhibitor); FABP are thought to play a role in the intracellular transport of long-chain fatty acids and their acyl-CoA esters; Belongs to the calycin superfamily. Fatty-acid binding protein (FABP) family.
			Zfp169	KO < WT	0.143	-0.489	PREDICTED: zinc finger protein 169 isoform X1 [Mus musculus]
			Hspa8	KO > WT	0.145	0.187	heat shock cognate 71 kDa protein [Mus musculus]	Lipopolysaccharide-associated protein 1; Molecular chaperone implicated in a wide variety of cellular processes, including protection of the proteome from stress, folding and transport of newly synthesized polypeptides, activation of proteolysis of misfolded proteins and the formation and dissociation of protein complexes. Plays a pivotal role in the protein quality control system, ensuring the c…
		YES	Pgam2	KO > WT	0.153	0.435	phosphoglycerate mutase 2 [Mus musculus]	Muscle-specific phosphoglycerate mutase; Interconversion of 3- and 2-phosphoglycerate with 2,3- bisphosphoglycerate as the primer of the reaction. Can also catalyze the reaction of EC 5.4.2.4 (synthase), but with a reduced activity; Belongs to the phosphoglycerate mutase family. BPG- dependent PGAM subfamily.
			Ahsg	KO > WT	0.155	0.386	alpha-2-HS-glycoprotein isoform 1 precursor [Mus musculus]	Alpha-2-HS-glycoprotein; Promotes endocytosis, possesses opsonic properties and influences the mineral phase of bone. Shows affinity for calcium and barium ions; Cystatins, type 4
		YES	Dmrt2	KO < WT	0.156	-0.222	doublesex- and mab-3-related transcription factor 2 [Mus musculus]	Doublesex- and mab-3-related transcription factor 2; Transcriptional activator that directly regulates early activation of the myogenic determination gene MYF5 by binding in a sequence-specific manner to the early epaxial enhancer element of it. Involved in somitogenesis during embryogenesis and somite development and differentiation into sclerotome and dermomyotome. Required for the initiation a…
			Ehd1	KO < WT	0.159	-0.457	EH domain-containing protein 1 [Mus musculus]	EH domain-containing protein 1; ATP- and membrane-binding protein that controls membrane reorganization/tubulation upon ATP hydrolysis. In vitro causes vesiculation of endocytic membranes. Acts in early endocytic membrane fusion and membrane trafficking of recycling endosomes. Recruited to endosomal membranes upon nerve growth factor stimulation, indirectly regulates neurite outgrowth (By similar…
			Actn2	KO > WT	0.162	0.59	alpha-actinin-2 [Mus musculus]	Alpha-actinin skeletal muscle isoform 2; F-actin cross-linking protein which is thought to anchor actin to a variety of intracellular structures. This is a bundling protein; Actinins
		YES	Cfl2	KO > WT	0.164	0.49	cofilin-2 [Mus musculus]	Cofilin, muscle isoform; Controls reversibly actin polymerization and depolymerization in a pH-sensitive manner. Its F-actin depolymerization activity is regulated by association with CSPR3. It has the ability to bind G- and F-actin in a 1:1 ratio of cofilin to actin. It is the major component of intranuclear and cytoplasmic actin rods. Required for muscle maintenance. May play a role during the …
			Myh1	KO > WT	0.165	0.281	PREDICTED: myosin-1 isoform X1 [Mus musculus]_x000D_ myosin-2 [Mus musculus]_x000D_ myosin-8 [Mus musculus]	Myosin, heavy chain 1, skeletal muscle, adult; Muscle contraction; Belongs to the TRAFAC class myosin-kinesin ATPase superfamily. Myosin family.
		YES	Hnrnph2	KO < WT	0.173	-0.285	PREDICTED: heterogeneous nuclear ribonucleoprotein H isoform X1 [Mus musculus]	Heterogeneous nuclear ribonucleoprotein H2 (H'); This protein is a component of the heterogeneous nuclear ribonucleoprotein (hnRNP) complexes which provide the substrate for the processing events that pre-mRNAs undergo before becoming functional, translatable mRNAs in the cytoplasm. Binds poly(RG); RNA binding motif containing
			Fitm1	KO < WT	0.174	-0.273	fat storage-inducing transmembrane protein 1 [Mus musculus]	Fat storage-inducing transmembrane protein 1; Plays an important role in lipid droplet accumulation; Belongs to the FIT family.
		YES	Psmd3	KO < WT	0.177	-0.307	26S proteasome non-ATPase regulatory subunit 3 [Mus musculus]	Proteasome (prosome, macropain) 26S subunit, non-ATPase, 3; Component of the 26S proteasome, a multiprotein complex involved in the ATP-dependent degradation of ubiquitinated proteins. This complex plays a key role in the maintenance of protein homeostasis by removing misfolded or damaged proteins, which could impair cellular functions, and by removing proteins whose functions are no longer requi…
			Tbc1d1	KO < WT	0.178	-0.289	PREDICTED: TBC1 domain family member 1 isoform X1 [Mus musculus]	TBC1 (tre-2/USP6, BUB2, cdc16) domain family, member 1; May act as a GTPase-activating protein for Rab family protein(s). May play a role in the cell cycle and differentiation of various tissues. Involved in the trafficking and translocation of GLUT4-containing vesicles and insulin-stimulated glucose uptake into cells (By similarity).
			Trdn	KO < WT	0.182	-0.174	triadin [Mus musculus]	Triadin; Contributes to the regulation of lumenal Ca2+ release via the sarcoplasmic reticulum calcium release channels RYR1 and RYR2, a key step in triggering skeletal and heart muscle contraction. Required for normal organization of the triad junction, where T-tubules and the sarcoplasmic reticulum terminal cisternae are in close contact (By similarity). Required for normal skeletal muscle stren…
		YES	Psmc5	KO > WT	0.182	0.595	26S proteasome regulatory subunit 8 [Mus musculus]	Proteasome (prosome, macropain) 26S subunit, ATPase, 5; Component of the 26S proteasome, a multiprotein complex involved in the ATP-dependent degradation of ubiquitinated proteins. This complex plays a key role in the maintenance of protein homeostasis by removing misfolded or damaged proteins, which could impair cellular functions, and by removing proteins whose functions are no longer required.…
			Rab5b	KO < WT	0.185	-0.326	PREDICTED: ras-related protein Rab-5B isoform X1 [Mus musculus]	RAB5B, member RAS oncogene family; Protein transport. Probably involved in vesicular traffic (By similarity); Belongs to the small GTPase superfamily. Rab family.
		YES	Prune1	KO > WT	0.186	0.642	exopolyphosphatase PRUNE1 [Mus musculus]	Drosophila-related expressed sequence 17; Phosphodiesterase (PDE) that has higher activity toward cAMP than cGMP, as substrate. Plays a role in cell proliferation, migration and differentiation, and acts as a negative regulator of NME1. Plays a role in the regulation of neurogenesis. Involved in the regulation of microtubule polymerization.
		YES	Abcf1	KO < WT	0.187	-0.237	ATP-binding cassette sub-family F member 1 [Mus musculus]	ATP-binding cassette, sub-family F (GCN20), member 1; Isoform 2 is required for efficient Cap- and IRES- mediated mRNA translation initiation. Isoform 2 is not involved in the ribosome biogenesis; ATP binding cassette subfamily F
			Pank4	KO < WT	0.187	-0.485	pantothenate kinase 4 isoform 1 [Mus musculus]	Pantothenic acid kinase 4; Plays a role in the physiological regulation of the intracellular CoA concentration.
			Atp6v1b2	KO < WT	0.189	-0.374	V-type proton ATPase subunit B, brain isoform [Mus musculus]	ATPase, H+ transporting, lysosomal 56/58kDa, V1 subunit B2; Non-catalytic subunit of the peripheral V1 complex of vacuolar ATPase. V-ATPase is responsible for acidifying a variety of intracellular compartments in eukaryotic cells; Belongs to the ATPase alpha/beta chains family.
YES (Roux 2012)		YES	Fhl1	KO > WT	0.189	0.655	PREDICTED: four and a half LIM domains protein 1 isoform X2 [Mus musculus]	Four and a half LIM domains protein 1; May have an involvement in muscle development or hypertrophy; LIM domain containing
		YES	Des	KO > WT	0.194	0.291	desmin [Mus musculus]	Desmin; Muscle-specific type III intermediate filament essential for proper muscular structure and function. Plays a crucial role in maintaining the structure of sarcomeres, inter-connecting the Z-disks and forming the myofibrils, linking them not only to the sarcolemmal cytoskeleton, but also to the nucleus and mitochondria, thus providing strength for the muscle fiber during activity. In adult …
			Rpgrip1	KO < WT	0.196	-0.174	PREDICTED: X-linked retinitis pigmentosa GTPase regulator-interacting protein 1 isoform X1 [Mus musculus]	X-linked retinitis pigmentosa GTPase regulator-interacting protein 1; May function as scaffolding protein. Required for normal location of RPGR at the connecting cilium of photoreceptor cells. Required for normal disk morphogenesis and disk organization in the outer segment of photoreceptor cells and for survival of photoreceptor cells; Belongs to the RPGRIP1 family.
			Atl2	KO < WT	0.198	-0.46	PREDICTED: atlastin-2 isoform X1 [Mus musculus]	ADP-ribosylation factor-like protein 6-interacting protein 2; GTPase tethering membranes through formation of trans- homooligomers and mediating homotypic fusion of endoplasmic reticulum membranes. Functions in endoplasmic reticulum tubular network biogenesis; Belongs to the TRAFAC class dynamin-like GTPase superfamily. GB1/RHD3-type GTPase family. GB1 subfamily.
			Dync1i2	KO < WT	0.198	-0.323	cytoplasmic dynein 1 intermediate chain 2 isoform 1 [Mus musculus]	Dynein, cytoplasmic 1, intermediate chain 2; Acts as one of several non-catalytic accessory components of the cytoplasmic dynein 1 complex that are thought to be involved in linking dynein to cargos and to adapter proteins that regulate dynein function. Cytoplasmic dynein 1 acts as a motor for the intracellular retrograde motility of vesicles and organelles along microtubules. The intermediate ch…
			Nt5c1a	KO < WT	0.198	-0.333	cytosolic 5'-nucleotidase 1A [Mus musculus]	5'-nucleotidase, cytosolic IA; Dephosphorylates the 5' and 2'(3')-phosphates of deoxyribonucleotides and has a broad substrate specificity. Helps to regulate adenosine levels in heart during ischemia and hypoxia; 5'-nucleotidases
			Hbb-bs	KO > WT	0.2	0.543	hemoglobin, beta adult s chain [Mus musculus]
			Col6a3	KO < WT	0.201	-0.24	collagen alpha-3(VI) chain isoform 1 precursor [Mus musculus]	Collagen alpha-3(VI) chain; Collagen VI acts as a cell-binding protein; Collagens
			Cul5	KO < WT	0.201	-0.221	cullin-5 isoform 1 [Mus musculus]	Vasopressin-activated calcium-mobilizing receptor 1; Core component of multiple SCF-like ECS (Elongin-Cullin 2/5-SOCS-box protein) E3 ubiquitin-protein ligase complexes, which mediate the ubiquitination and subsequent proteasomal degradation of target proteins. As a scaffold protein may contribute to catalysis through positioning of the substrate and the ubiquitin- conjugating enzyme. The functio…
			Smtnl2	KO < WT	0.202	-0.314	smoothelin-like protein 2 [Mus musculus]	Smoothelin-like protein 2; Smoothelin like 2
			Uggt1	KO < WT	0.205	-0.253	UDP-glucose:glycoprotein glucosyltransferase 1 precursor [Mus musculus]	UDP-glucose ceramide glucosyltransferase-like 1; Recognizes glycoproteins with minor folding defects. Reglucosylates single N-glycans near the misfolded part of the protein, thus providing quality control for protein folding in the endoplasmic reticulum. Reglucosylated proteins are recognized by calreticulin for recycling to the endoplasmic reticulum and refolding or degradation; UDP-glucose glyc…
YES (Zastrow 2006)		YES	Ttn	KO < WT	0.205	-0.573	titin isoform N2-A [Mus musculus]	Rhabdomyosarcoma antigen MU-RMS-40.14; Key component in the assembly and functioning of vertebrate striated muscles. By providing connections at the level of individual microfilaments, it contributes to the fine balance of forces between the two halves of the sarcomere. The size and extensibility of the cross-links are the main determinants of sarcomere extensibility properties of muscle. In non-…
		YES	Mob1b	KO > WT	0.206	0.284	MOB kinase activator 1B [Mus musculus]	Mps one binder kinase activator-like 1A; Activator of LATS1/2 in the Hippo signaling pathway which plays a pivotal role in organ size control and tumor suppression by restricting proliferation and promoting apoptosis. The core of this pathway is composed of a kinase cascade wherein STK3/MST2 and STK4/MST1, in complex with its regulatory protein SAV1, phosphorylates and activates LATS1/2 in comple…
			Prkar2a	KO < WT	0.207	-0.238	cAMP-dependent protein kinase type II-alpha regulatory subunit [Mus musculus]	cAMP-dependent protein kinase type II-alpha regulatory subunit; Regulatory subunit of the cAMP-dependent protein kinases involved in cAMP signaling in cells. Type II regulatory chains mediate membrane association by binding to anchoring proteins, including the MAP2 kinase.
			Mybpc1	KO < WT	0.209	-0.311	PREDICTED: myosin-binding protein C, fast-type isoform X1 [Mus musculus]_x000D_ PREDICTED: myosin-binding protein C, slow-type isoform X12 [Mus musculus]_x000D_ PREDICTED: myosin-binding protein C, slow-type isoform X1 [Mus musculus]	C-protein, skeletal muscle slow isoform; Thick filament-associated protein located in the crossbridge region of vertebrate striated muscle a bands. In vitro it binds MHC, F-actin and native thin filaments, and modifies the activity of actin-activated myosin ATPase. It may modulate muscle contraction or may play a more structural role; Belongs to the immunoglobulin superfamily. MyBP family.
			Lgals1	KO > WT	0.215	0.549	galectin-1 [Mus musculus]	Lectin, galactoside-binding, soluble, 1; Lectin that binds beta-galactoside and a wide array of complex carbohydrates. Plays a role in regulating apoptosis, cell proliferation and cell differentiation. Inhibits CD45 protein phosphatase activity and therefore the dephosphorylation of Lyn kinase. Strong inducer of T-cell apoptosis; Endogenous ligands
			Actn3	KO > WT	0.219	0.416	alpha-actinin-3 [Mus musculus]_x000D_ alpha-actinin-2 [Mus musculus]	Alpha-actinin skeletal muscle isoform 3; F-actin cross-linking protein which is thought to anchor actin to a variety of intracellular structures. This is a bundling protein; Actinins
			Actr1b	KO < WT	0.221	-0.229	beta-centractin [Mus musculus]	ARP1 actin-related protein 1 homolog B, centractin beta (yeast); Component of a multi-subunit complex involved in microtubule based vesicle motility. It is associated with the centrosome; Actin related proteins
			Nipsnap2	KO > WT	0.225	0.392	protein NipSnap homolog 2 [Mus musculus]	Glioblastoma amplified sequence; May act as a positive regulator of L-type calcium channels; Belongs to the NipSnap family.
		YES	Actb	KO > WT	0.228	0.135	actin, cytoplasmic 1 [Mus musculus]	Actin, cytoplasmic 1; Actins are highly conserved proteins that are involved in various types of cell motility and are ubiquitously expressed in all eukaryotic cells.
			Myo18a	KO < WT	0.229	-0.27	PREDICTED: unconventional myosin-XVIIIa isoform X15 [Mus musculus]	Molecule associated with JAK3 N-terminus; May link Golgi membranes to the cytoskeleton and participate in the tensile force required for vesicle budding from the Golgi. Thereby, may play a role in Golgi membrane trafficking and could indirectly give its flattened shape to the Golgi apparatus. Alternatively, in concert with LURAP1 and CDC42BPA/CDC42BPB, has been involved in modulating lamellar act…
		YES	Cavin1	KO > WT	0.229	0.254	caveolae-associated protein 1 [Mus musculus]	Polymerase I and transcript release factor; Plays an important role in caveolae formation and organization. Essential for the formation of caveolae in all tissues. Core component of the CAVIN complex which is essential for recruitment of the complex to the caveolae in presence of calveolin-1 (CAV1). Essential for normal oligomerization of CAV1. Promotes ribosomal transcriptional activity in respo…
		YES	Hnrnpul2	KO < WT	0.229	-0.377	heterogeneous nuclear ribonucleoprotein U-like protein 2 [Mus musculus]	Heterogeneous nuclear ribonucleoprotein U like 2
			Phkb	KO < WT	0.23	-0.29	PREDICTED: phosphorylase b kinase regulatory subunit beta isoform X1 [Mus musculus]	Phosphorylase b kinase regulatory subunit beta; Phosphorylase b kinase catalyzes the phosphorylation of serine in certain substrates, including troponin I. The beta chain acts as a regulatory unit and modulates the activity of the holoenzyme in response to phosphorylation.
			Acsl1	KO > WT	0.231	0.249	PREDICTED: long-chain-fatty-acid--CoA ligase 1 isoform X1 [Mus musculus]	acyl-CoA synthetase long-chain family member 1; Activation of long-chain fatty acids for both synthesis of cellular lipids, and degradation via beta-oxidation. Preferentially uses palmitoleate, oleate and linoleate; Acyl-CoA synthetase family
		YES	Dmd	KO < WT	0.231	-0.201	PREDICTED: dystrophin isoform X1 [Mus musculus]	Dystrophin; Anchors the extracellular matrix to the cytoskeleton via F-actin. Ligand for dystroglycan. Component of the dystrophin- associated glycoprotein complex which accumulates at the neuromuscular junction (NMJ) and at a variety of synapses in the peripheral and central nervous systems and has a structural function in stabilizing the sarcolemma. Also implicated in signaling events and synap…
		YES	Irak2	KO > WT	0.231	0.598	interleukin-1 receptor-associated kinase-like 2 isoform a [Mus musculus]	Interleukin-1 receptor-associated kinase-like 2; Binds to the IL-1 type I receptor following IL-1 engagement, triggering intracellular signaling cascades leading to transcriptional up-regulation and mRNA stabilization.
			Ap3d1	KO > WT	0.231	16	AP-3 complex subunit delta-1 [Mus musculus]	Adaptor-related protein complex 3, delta 1 subunit; Part of the AP-3 complex, an adaptor-related complex which is not clathrin-associated. The complex is associated with the Golgi region as well as more peripheral structures. It facilitates the budding of vesicles from the Golgi membrane and may be directly involved in trafficking to lysosomes. Involved in process of CD8+ T-cell and NK cell degra…
			Tex55	KO < WT	0.232	-0.38	uncharacterized protein C3orf30 homolog [Mus musculus]
			Pfn2	KO > WT	0.232	0.346	profilin-2 [Mus musculus]	Profilin II; Binds to actin and affects the structure of the cytoskeleton. At high concentrations, profilin prevents the polymerization of actin, whereas it enhances it at low concentrations. By binding to PIP2, it inhibits the formation of IP3 and DG.
		YES	Stat5b	KO < WT	0.233	-0.341	PREDICTED: signal transducer and activator of transcription 5B isoform X2 [Mus musculus]	Signal transducer and activator of transcription 5B; Carries out a dual function: signal transduction and activation of transcription. Mediates cellular responses to the cytokine KITLG/SCF and other growth factors. Binds to the GAS element and activates PRL-induced transcription. Positively regulates hematopoietic/erythroid differentiation.
			Asap2	KO > WT	0.233	0.198	PREDICTED: arf-GAP with SH3 domain, ANK repeat and PH domain-containing protein 2 isoform X1 [Mus musculus]	Arf-GAP with SH3 domain, ANK repeat and PH domain-containing protein 2; Activates the small GTPases ARF1, ARF5 and ARF6. Regulates the formation of post-Golgi vesicles and modulates constitutive secretion. Modulates phagocytosis mediated by Fc gamma receptor and ARF6. Modulates PXN recruitment to focal contacts and cell migration; Ankyrin repeat domain containing
			Mylpf	KO > WT	0.234	0.419	myosin regulatory light chain 2, skeletal muscle isoform isoform 1 [Mus musculus]	Myosin light chain, phosphorylatable, fast skeletal muscle; EF-hand domain containing
			Casq1	KO > WT	0.234	0.559	calsequestrin-1 precursor [Mus musculus]	Calsequestrin 1 (fast-twitch, skeletal muscle); Calsequestrin is a high-capacity, moderate affinity, calcium-binding protein and thus acts as an internal calcium store in muscle. Calcium ions are bound by clusters of acidic residues at the protein surface, often at the interface between subunits. Can bind around 80 Ca(2+) ions. Regulates the release of lumenal Ca(2+) via the calcium release chann…
			Plec	KO < WT	0.235	-0.131	plectin isoform 12alpha [Mus musculus]	Hemidesmosomal protein 1; Interlinks intermediate filaments with microtubules and microfilaments and anchors intermediate filaments to desmosomes or hemidesmosomes. Could also bind muscle proteins such as actin to membrane complexes in muscle. May be involved not only in the filaments network, but also in the regulation of their dynamics. Structural component of muscle. Isoform 9 plays a major ro…
			Lama4	KO > WT	0.237	15.8	laminin subunit alpha-4 precursor [Mus musculus]	Laminin-14 subunit alpha; Binding to cells via a high affinity receptor, laminin is thought to mediate the attachment, migration and organization of cells into tissues during embryonic development by interacting with other extracellular matrix components.
			Ddx6	KO < WT	0.238	-0.252	PREDICTED: probable ATP-dependent RNA helicase DDX6 isoform X1 [Mus musculus]	Probable ATP-dependent RNA helicase DDX6; In the process of mRNA degradation, plays a role in mRNA decapping. Blocks autophagy in nutrient-rich conditions by repressing the expression of ATG-related genes through degration of their transcripts; Belongs to the DEAD box helicase family. DDX6/DHH1 subfamily.
			Fasn	KO > WT	0.241	0.504	fatty acid synthase [Mus musculus]	Fatty acid synthase; Fatty acid synthetase catalyzes the formation of long- chain fatty acids from acetyl-CoA, malonyl-CoA and NADPH. This multifunctional protein has 7 catalytic activities and an acyl carrier protein; Seven-beta-strand methyltransferase motif containing
YES (Roux 2012)		YES	Rangap1	KO > WT	0.245	15.8	PREDICTED: ran GTPase-activating protein 1 isoform X1 [Mus musculus]	Ran GTPase activating protein 1; GTPase activator for the nuclear Ras-related regulatory protein Ran, converting it to the putatively inactive GDP-bound state.
			Kif5b	KO < WT	0.251	-0.284	kinesin-1 heavy chain [Mus musculus]	Conventional kinesin heavy chain; Microtubule-dependent motor required for normal distribution of mitochondria and lysosomes. Can induce formation of neurite-like membrane protrusions in non-neuronal cells in a ZFYVE27-dependent manner (By similarity). Regulates centrosome and nuclear positioning during mitotic entry. During the G2 phase of the cell cycle in a BICD2-dependent manner, antagonizes …
			Tnnt1	KO > WT	0.254	0.366	PREDICTED: troponin T, slow skeletal muscle isoform X1 [Mus musculus]_x000D_ PREDICTED: troponin T, fast skeletal muscle isoform X27 [Mus musculus]_x000D_ PREDICTED: troponin T, fast skeletal muscle isoform X26 [Mus musculus]	Troponin T type 1 (skeletal, slow); Troponin T is the tropomyosin-binding subunit of troponin, the thin filament regulatory complex which confers calcium-sensitivity to striated muscle actomyosin ATPase activity.
		YES	Ank1	KO < WT	0.255	-0.308	PREDICTED: ankyrin-1 isoform X1 [Mus musculus]	Ankyrin 1, erythrocytic; Attaches integral membrane proteins to cytoskeletal elements; binds to the erythrocyte membrane protein band 4.2, to Na-K ATPase, to the lymphocyte membrane protein GP85, and to the cytoskeletal proteins fodrin, tubulin, vimentin and desmin. Erythrocyte ankyrins also link spectrin (beta chain) to the cytoplasmic domain of the erythrocytes anion exchange protein; they reta…
		YES	Alpk3	KO < WT	0.255	-0.248	alpha-protein kinase 3 [Mus musculus]	Muscle alpha-protein kinase; Kinase that recognizes phosphorylation sites in which the surrounding peptides have an alpha-helical conformation. Plays a role in cardiomyocyte differentiation (By similarity); I-set domain containing
			Ppp2cb	KO > WT	0.255	0.296	serine/threonine-protein phosphatase 2A catalytic subunit beta isoform [Mus musculus]	Serine/threonine-protein phosphatase 2A catalytic subunit beta isoform; PP2A can modulate the activity of phosphorylase B kinase casein kinase 2, mitogen-stimulated S6 kinase, and MAP-2 kinase; Protein phosphatase catalytic subunits
		YES	Setd2	KO > WT	0.255	0.624	PREDICTED: histone-lysine N-methyltransferase SETD2 isoform X1 [Mus musculus]	Histone-lysine N-methyltransferase SETD2; Histone methyltransferase that specifically trimethylates 'Lys-36' of histone H3 (H3K36me3) using dimethylated 'Lys-36' (H3K36me2) as substrate. Represents the main enzyme generating H3K36me3, a specific tag for epigenetic transcriptional activation (By similarity). Plays a role in chromatin structure modulation during elongation by coordinating recruitme…
		YES	H1f4	KO < WT	0.264	-0.338	histone H1.4 [Mus musculus]_x000D_ histone H1.3 [Mus musculus]	Histone cluster 1, H1e; Histone H1 protein binds to linker DNA between nucleosomes forming the macromolecular structure known as the chromatin fiber. Histones H1 are necessary for the condensation of nucleosome chains into higher-order structured fibers. Acts also as a regulator of individual gene transcription through chromatin remodeling, nucleosome spacing and DNA methylation (By similarity).
			Pitpna	KO < WT	0.268	-0.186	phosphatidylinositol transfer protein alpha isoform [Mus musculus]	Phosphatidylinositol transfer protein alpha isoform; Catalyzes the transfer of PtdIns and phosphatidylcholine between membranes; Phosphatidylinositol transfer proteins
			Agl	KO < WT	0.274	-0.238	PREDICTED: glycogen debranching enzyme isoform X1 [Mus musculus]	Amylo-alpha-1, 6-glucosidase, 4-alpha-glucanotransferase; Multifunctional enzyme acting as 1,4-alpha-D-glucan:1,4- alpha-D-glucan 4-alpha-D-glycosyltransferase and amylo-1,6- glucosidase in glycogen degradation; Belongs to the glycogen debranching enzyme family.
		YES	Uso1	KO < WT	0.275	-0.246	PREDICTED: general vesicular transport factor p115 isoform X1 [Mus musculus]	General vesicular transport factor p115; General vesicular transport factor required for intercisternal transport in the Golgi stack; it is required for transcytotic fusion and/or subsequent binding of the vesicles to the target membrane. May well act as a vesicular anchor by interacting with the target membrane and holding the vesicular and target membranes in proximity; Armadillo-like helical d…
			Abce1	KO < WT	0.28	-0.312	ATP-binding cassette sub-family E member 1 [Mus musculus]	ATP-binding cassette, sub-family E (OABP), member 1; Antagonizes the binding of 2-5A (5'-phosphorylated 2',5'-linked oligoadenylates) by RNase L through direct interaction with RNase L and therefore inhibits its endoribonuclease activity. May play a central role in the regulation of mRNA turnover. Antagonizes the anti-viral effect of the interferon-regulated 2-5A/RNase L pathway. May act as a cha…
		YES	Mettl14	KO < WT	0.281	-0.307	N6-adenosine-methyltransferase subunit METTL14 [Mus musculus]	N6-adenosine-methyltransferase non-catalytic subunit; The METTL3-METTL14 heterodimer forms a N6- methyltransferase complex that methylates adenosine residues at the N(6) position of some mRNAs and regulates the circadian clock, differentiation of embryonic stem cells and cortical neurogenesis. In the heterodimer formed with METTL3, METTL14 constitutes the RNA-binding scaffold that recognizes the …
		YES	Ybx1	KO < WT	0.283	-11.6	PREDICTED: nuclease-sensitive element-binding protein 1 isoform X1 [Mus musculus]	CCAAT-binding transcription factor I subunit A; Mediates pre-mRNA alternative splicing regulation. Binds to splice sites in pre-mRNA and regulates splice site selection. Binds and stabilizes cytoplasmic mRNA. Contributes to the regulation of translation by modulating the interaction between the mRNA and eukaryotic initiation factors (By similarity). Regulates the transcription of numerous genes. …
			H2ac18	KO > WT	0.285	0.42	histone H2A type 2-A [Mus musculus]
			Ak1	KO > WT	0.288	0.325	adenylate kinase isoenzyme 1 isoform 1 [Mus musculus]	Adenylate monophosphate kinase; Catalyzes the reversible transfer of the terminal phosphate group between ATP and AMP. Also displays broad nucleoside diphosphate kinase activity. Plays an important role in cellular energy homeostasis and in adenine nucleotide metabolism; Belongs to the adenylate kinase family. AK1 subfamily.
		YES	Rtca	KO > WT	0.29	0.307	RNA 3'-terminal phosphate cyclase [Mus musculus]	RNA terminal phosphate cyclase domain-containing protein 1; Catalyzes the conversion of 3'-phosphate to a 2',3'- cyclic phosphodiester at the end of RNA. The mechanism of action of the enzyme occurs in 3 steps: (A) adenylation of the enzyme by ATP; (B) transfer of adenylate to an RNA-N3'P to produce RNA- N3'PP5'A; (C) and attack of the adjacent 2'-hydroxyl on the 3'- phosphorus in the diester lin…
YES (Dittmer 2013)		YES	Rtn4	KO < WT	0.29	-0.229	reticulon-4 isoform A [Mus musculus]	Neuroendocrine-specific protein C homolog; Developmental neurite growth regulatory factor with a role as a negative regulator of axon-axon adhesion and growth, and as a facilitator of neurite branching. Regulates neurite fasciculation, branching and extension in the developing nervous system. Involved in down-regulation of growth, stabilization of wiring and restriction of plasticity in the adult…
YES (Dittmer 2013)			Apoa2	KO < WT	0.291	-0.659	apolipoprotein A-II preproprotein [Mus musculus]	Apolipoprotein A-II; May stabilize HDL (high density lipoprotein) structure by its association with lipids, and affect the HDL metabolism; Apolipoproteins
			Mybpc1	KO < WT	0.292	-0.222	PREDICTED: myosin-binding protein C, slow-type isoform X1 [Mus musculus]	C-protein, skeletal muscle slow isoform; Thick filament-associated protein located in the crossbridge region of vertebrate striated muscle a bands. In vitro it binds MHC, F-actin and native thin filaments, and modifies the activity of actin-activated myosin ATPase. It may modulate muscle contraction or may play a more structural role; Belongs to the immunoglobulin superfamily. MyBP family.
		YES	Tnni2	KO > WT	0.293	0.313	PREDICTED: troponin T, fast skeletal muscle isoform X27 [Mus musculus]_x000D_ PREDICTED: troponin T, fast skeletal muscle isoform X26 [Mus musculus]	Troponin I type 2 (skeletal, fast); Troponin I is the inhibitory subunit of troponin, the thin filament regulatory complex which confers calcium-sensitivity to striated muscle actomyosin ATPase activity.
			H2-Ke6	KO < WT	0.295	-0.472	estradiol 17-beta-dehydrogenase 8 [Mus musculus]	3-ketoacyl-[acyl-carrier-protein] reductase alpha subunit; NAD-dependent 17-beta-hydroxysteroid dehydrogenase with highest activity towards estradiol. Has very low activity towards testosterone. The heterotetramer with CBR4 has NADH-dependent 3-ketoacyl-acyl carrier protein reductase activity, and thereby plays a role in mitochondrial fatty acid biosynthesis. Within the heterotetramer, HSD17B8 bi…
			Hsf2bp	KO > WT	0.295	0.816	PREDICTED: heat shock factor 2-binding protein isoform X1 [Mus musculus]	Heat shock transcription factor 2 binding protein; May be involved in modulating HSF2 activation in testis. Inhibits BNC1 transcriptional activity during spermatogenesis, probably by sequestering it in the cytoplasm (By similarity); Armadillo-like helical domain containing
		YES	Smtnl1	KO > WT	0.303	0.364	PREDICTED: smoothelin-like protein 1 isoform X1 [Mus musculus]	Smoothelin-like protein 1; Plays a role in the regulation of contractile properties of both striated and smooth muscles. When unphosphorylated, may inhibit myosin dephosphorylation. Phosphorylation at Ser-299 reduces this inhibitory activity (By similarity).
			Hba-a2	KO > WT	0.305	0.411	hemoglobin alpha, adult chain 2 [Mus musculus]
		YES	Naca	KO < WT	0.305	-0.303	nascent polypeptide-associated complex subunit alpha isoform a [Mus musculus]	Nascent polypeptide-associated complex subunit alpha, muscle-specific form; Cardiac- and muscle-specific transcription factor. May act to regulate the expression of genes involved in the development of myotubes. Plays a critical role in ventricular cardiomyocyte expansion and regulates postnatal skeletal muscle growth and regeneration. Involved in the organized assembly of thick and thin filament…
			2210010C04Rik	KO < WT	0.312	-0.214	trypsinogen 7 precursor [Mus musculus]
			Rab14	KO > WT	0.312	4.38	ras-related protein Rab-14 [Mus musculus]	RAB14, member RAS oncogene family; Involved in membrane trafficking between the Golgi complex and endosomes during early embryonic development. Regulates the Golgi to endosome transport of FGFR-containing vesicles during early development, a key process for developing basement membrane and epiblast and primitive endoderm lineages during early postimplantation development. May act by modulating th…
			Try10	KO > WT	0.316	4.38	trypsin 10 precursor [Mus musculus]
			Sypl2	KO < WT	0.316	-0.152	PREDICTED: synaptophysin-like protein 2 isoform X1 [Mus musculus]
		YES	Got1	KO > WT	0.317	4.27	aspartate aminotransferase, cytoplasmic [Mus musculus]	Glutamic-oxaloacetic transaminase 1, soluble; Biosynthesis of L-glutamate from L-aspartate or L- cysteine. Important regulator of levels of glutamate, the major excitatory neurotransmitter of the vertebrate central nervous system. Acts as a scavenger of glutamate in brain neuroprotection. The aspartate aminotransferase activity is involved in hepatic glucose synthesis during development and in ad…
			Nes	KO < WT	0.318	-0.482	nestin [Mus musculus]	Nestin; Required for brain and eye development. Promotes the disassembly of phosphorylated vimentin intermediate filaments (IF) during mitosis and may play a role in the trafficking and distribution of IF proteins and other cellular factors to daughter cells during progenitor cell division. Required for survival, renewal and mitogen-stimulated proliferation of neural progenitor cells (By similari…
			Cacnb3	KO < WT	0.321	-0.256	PREDICTED: voltage-dependent L-type calcium channel subunit beta-3 isoform X1 [Mus musculus]	Voltage-dependent L-type calcium channel subunit beta-3; The beta subunit of voltage-dependent calcium channels contributes to the function of the calcium channel by increasing peak calcium current, shifting the voltage dependencies of activation and inactivation, modulating G protein inhibition and controlling the alpha-1 subunit membrane targeting.
		YES	Ywhae	KO > WT	0.322	8.32	14-3-3 protein epsilon [Mus musculus]	Tyrosine 3-monooxygenase/tryptophan 5-monooxygenase activation protein, epsilon; Adapter protein implicated in the regulation of a large spectrum of both general and specialized signaling pathways. Binds to a large number of partners, usually by recognition of a phosphoserine or phosphothreonine motif. Binding generally results in the modulation of the activity of the binding partner (By similari…
		YES	Serbp1	KO < WT	0.322	-8.51	plasminogen activator inhibitor 1 RNA-binding protein isoform 3 [Mus musculus]	Plasminogen activator inhibitor 1 RNA-binding protein; May play a role in the regulation of mRNA stability. Binds to the 3'-most 134 nt of the SERPINE1/PAI1 mRNA, a region which confers cyclic nucleotide regulation of message decay.
			Nefl	KO > WT	0.323	8.45	neurofilament light polypeptide [Mus musculus]_x000D_ neurofilament medium polypeptide [Mus musculus]_x000D_ desmin [Mus musculus]_x000D_ vimentin [Mus musculus]	Neurofilament, light polypeptide; Neurofilaments usually contain three intermediate filament proteins: L, M, and H which are involved in the maintenance of neuronal caliber.
		YES	Calm1	KO > WT	0.324	0.421	calmodulin-1 isoform 1 [Mus musculus]	Calmodulin 1 (phosphorylase kinase, delta); Calmodulin mediates the control of a large number of enzymes, ion channels, aquaporins and other proteins through calcium-binding. Among the enzymes to be stimulated by the calmodulin-calcium complex are a number of protein kinases and phosphatases. Together with CCP110 and centrin, is involved in a genetic pathway that regulates the centrosome cycle an…
			Myh1	KO > WT	0.324	0.228	PREDICTED: myosin-1 isoform X1 [Mus musculus]_x000D_ myosin-2 [Mus musculus]	Myosin, heavy chain 1, skeletal muscle, adult; Muscle contraction; Belongs to the TRAFAC class myosin-kinesin ATPase superfamily. Myosin family.
		YES	Syncrip	KO < WT	0.325	-8.51	heterogeneous nuclear ribonucleoprotein Q isoform 1 [Mus musculus]	Synaptotagmin binding, cytoplasmic RNA interacting protein; Heterogenous nuclear ribonucleoprotein (hnRNP) implicated in mRNA processing mechanisms. Component of the CRD- mediated complex that promotes MYC mRNA stability. Isoform 1, isoform 2 and isoform 3 are associated in vitro with pre-mRNA, splicing intermediates and mature mRNA protein complexes. Isoform 1 binds to apoB mRNA AU-rich sequence…
		YES	Calr	KO > WT	0.329	8.32	calreticulin precursor [Mus musculus]	Endoplasmic reticulum resident protein 60; Calcium-binding chaperone that promotes folding, oligomeric assembly and quality control in the endoplasmic reticulum (ER) via the calreticulin/calnexin cycle. This lectin interacts transiently with almost all of the monoglucosylated glycoproteins that are synthesized in the ER. Interacts with the DNA-binding domain of NR3C1 and mediates its nuclear expo…
			Synm	KO > WT	0.333	8.01	synemin isoform H [Mus musculus]	Synemin, intermediate filament protein; Type-VI intermediate filament (IF) which plays an important cytoskeletal role within the muscle cell cytoskeleton. It forms heteropolymeric IFs with desmin and/or vimentin, and via its interaction with cytoskeletal proteins alpha-dystrobrevin, dystrophin, talin-1, utrophin and vinculin, is able to link these heteropolymeric IFs to adherens-type junctions, s…
			Prob1	KO > WT	0.337	8.14	proline-rich basic protein 1 [Mus musculus]	Proline rich basic protein 1
			Prxl2b	KO < WT	0.338	-0.552	prostamide/prostaglandin F synthase [Mus musculus]
			Ldhb	KO > WT	0.338	4.17	L-lactate dehydrogenase B chain isoform Ldhbx [Mus musculus]	Renal carcinoma antigen NY-REN-46; Lactate dehydrogenase B; Belongs to the LDH/MDH superfamily. LDH family.
			Ola1	KO > WT	0.338	8.28	obg-like ATPase 1 isoform a [Mus musculus]	DNA damage-regulated overexpressed in cancer 45; Hydrolyzes ATP, and can also hydrolyze GTP with lower efficiency. Has lower affinity for GTP; Belongs to the TRAFAC class OBG-HflX-like GTPase superfamily. OBG GTPase family. YchF/OLA1 subfamily.
		YES	Rrbp1	KO > WT	0.339	8.29	ribosome-binding protein 1 isoform a [Mus musculus]	180 kDa ribosome receptor homolog; Acts as a ribosome receptor and mediates interaction between the ribosome and the endoplasmic reticulum membrane.
			Tpm2	KO > WT	0.339	0.434	tropomyosin beta chain isoform Tpm2.2st [Mus musculus]	Tropomyosin beta chain; Tropomyosin 2; Belongs to the tropomyosin family.
			Apob	KO < WT	0.342	-0.831	apolipoprotein B-100 precursor [Mus musculus]	Apolipoprotein B-100; Apolipoprotein B is a major protein constituent of chylomicrons (apo B-48), LDL (apo B-100) and VLDL (apo B-100). Apo B-100 functions as a recognition signal for the cellular binding and internalization of LDL particles by the apoB/E receptor; Apolipoproteins
			Plin1	KO > WT	0.342	0.367	PREDICTED: perilipin-1 isoform X1 [Mus musculus]	Lipid droplet-associated protein; Modulator of adipocyte lipid metabolism. Coats lipid storage droplets to protect them from breakdown by hormone- sensitive lipase (HSL). Its absence may result in leanness. Plays a role in unilocular lipid droplet formation by activating CIDEC. Their interaction promotes lipid droplet enlargement and directional net neutral lipid transfer. May modulate lipolysis …
		YES	Cse1l	KO > WT	0.344	7.99	exportin-2 [Mus musculus]	CSE1 chromosome segregation 1-like (yeast); Export receptor for importin-alpha. Mediates importin- alpha re-export from the nucleus to the cytoplasm after import substrates (cargos) have been released into the nucleoplasm. In the nucleus binds cooperatively to importin-alpha and to the GTPase Ran in its active GTP-bound form. Docking of this trimeric complex to the nuclear pore complex (NPC) is m…
			Fbn1	KO > WT	0.345	4.2	PREDICTED: fibrillin-1 isoform X1 [Mus musculus]	Fibrillin 1; Fibrillin-1: Structural component of the 10-12 nm diameter microfibrils of the extracellular matrix, which conveys both structural and regulatory properties to load-bearing connective tissues. Fibrillin-1- containing microfibrils provide long-term force bearing structural support. In tissues such as the lung, blood vessels and skin, microfibrils form the periphery of the elastic fibe…
		YES	Anp32a	KO < WT	0.346	-7.87	PREDICTED: acidic leucine-rich nuclear phosphoprotein 32 family member A isoform X1 [Mus musculus]	Acidic (leucine-rich) nuclear phosphoprotein 32 family, member A; Implicated in a number of cellular processes, including proliferation, differentiation, caspase-dependent and caspase- independent apoptosis, suppression of transformation (tumor suppressor), inhibition of protein phosphatase 2A, regulation of mRNA trafficking and stability in association with ELAVL1, and inhibition of acetyltransf…
			Myh2	KO > WT	0.347	0.239	myosin-2 [Mus musculus]_x000D_ myosin-8 [Mus musculus]	Myosin, heavy chain 2, skeletal muscle, adult; Muscle contraction. Required for cytoskeleton organization (By similarity); Myosin heavy chains
		YES	Jup	KO > WT	0.347	8.02	PREDICTED: junction plakoglobin isoform X1 [Mus musculus]	Junction plakoglobin; Common junctional plaque protein. The membrane- associated plaques are architectural elements in an important strategic position to influence the arrangement and function of both the cytoskeleton and the cells within the tissue. The presence of plakoglobin in both the desmosomes and in the intermediate junctions suggests that it plays a central role in the structure and func…
			Myh3	KO > WT	0.348	8.14	PREDICTED: myosin-3 isoform X1 [Mus musculus]	Myosin heavy chain, fast skeletal muscle, embryonic; Muscle contraction; Belongs to the TRAFAC class myosin-kinesin ATPase superfamily. Myosin family.
			Dnaja2	KO > WT	0.348	3.77	dnaJ homolog subfamily A member 2 [Mus musculus]	Cell cycle progression restoration gene 3 protein; Co-chaperone of Hsc70. Stimulates ATP hydrolysis and the folding of unfolded proteins mediated by HSPA1A/B (in vitro); DNAJ heat shock proteins
		YES	Ldha	KO > WT	0.348	0.372	L-lactate dehydrogenase A chain isoform 2 [Mus musculus]	Cell proliferation-inducing gene 19 protein; Lactate dehydrogenase A; Belongs to the LDH/MDH superfamily. LDH family.
YES (Dittmer 2013)			Anxa6	KO > WT	0.349	7.94	annexin A6 isoform a [Mus musculus]	67 kDa calelectrin; May associate with CD21. May regulate the release of Ca(2+) from intracellular stores; Annexins
			Isoc2a	KO > WT	0.349	3.79	isochorismatase domain-containing protein 2A precursor [Mus musculus]
			Ogn	KO > WT	0.349	8.2	mimecan precursor [Mus musculus]	Osteoinductive factor; Induces bone formation in conjunction with TGF-beta-1 or TGF-beta-2; Small leucine rich repeat proteoglycans
			Cdc42	KO > WT	0.349	4.03	cell division control protein 42 homolog isoform 1 precursor [Mus musculus]	Cell division control protein 42 homolog; Plasma membrane-associated small GTPase which cycles between an active GTP-bound and an inactive GDP-bound state. In active state binds to a variety of effector proteins to regulate cellular responses. Involved in epithelial cell polarization processes. Regulates the bipolar attachment of spindle microtubules to kinetochores before chromosome congression …
			Map4	KO < WT	0.35	-0.32	PREDICTED: microtubule-associated protein 4 isoform X1 [Mus musculus]	Microtubule-associated protein 4; Non-neuronal microtubule-associated protein. Promotes microtubule assembly.
			Ablim2	KO > WT	0.351	7.93	PREDICTED: actin-binding LIM protein 2 isoform X2 [Mus musculus]	Actin binding LIM protein family, member 2; May act as scaffold protein. May stimulate ABRA activity and ABRA-dependent SRF transcriptional activity; LIM domain containing
YES (CC Yu 2013)		YES	Vcp	KO > WT	0.352	3.99	transitional endoplasmic reticulum ATPase [Mus musculus]	Transitional endoplasmic reticulum ATPase; Necessary for the fragmentation of Golgi stacks during mitosis and for their reassembly after mitosis. Involved in the formation of the transitional endoplasmic reticulum (tER). The transfer of membranes from the endoplasmic reticulum to the Golgi apparatus occurs via 50-70 nm transition vesicles which derive from part-rough, part-smooth transitional ele…
			Loxhd1	KO > WT	0.352	7.8	PREDICTED: lipoxygenase homology domain-containing protein 1 isoform X1 [Mus musculus]	Lipoxygenase homology domain-containing protein 1; Involved in hearing. Required for normal function of hair cells in the inner ear (By similarity); Deafness associated genes
		YES	Picalm	KO < WT	0.354	-0.328	PREDICTED: phosphatidylinositol-binding clathrin assembly protein isoform X1 [Mus musculus]	Phosphatidylinositol binding clathrin assembly protein; Assembly protein recruiting clathrin and adapter protein complex 2 (AP2) to cell membranes at sites of coated-pit formation and clathrin-vesicle assembly. May be required to determine the amount of membrane to be recycled, possibly by regulating the size of the clathrin cage. Involved in AP2-dependent clathrin-mediated endocytosis at the neu…
			Dtna	KO > WT	0.355	3.93	PREDICTED: dystrobrevin alpha isoform X1 [Mus musculus]	Dystrophin-related protein 3; May be involved in the formation and stability of synapses as well as being involved in the clustering of nicotinic acetylcholine receptors; Belongs to the dystrophin family. Dystrobrevin subfamily.
			Necap2	KO > WT	0.357	7.91	adaptin ear-binding coat-associated protein 2 [Mus musculus]	Adaptin ear-binding coat-associated protein 2; Involved in endocytosis.
			Atp1a3	KO > WT	0.359	7.97	PREDICTED: sodium/potassium-transporting ATPase subunit alpha-3 isoform X1 [Mus musculus]	Sodium/potassium-transporting ATPase subunit alpha-3; This is the catalytic component of the active enzyme, which catalyzes the hydrolysis of ATP coupled with the exchange of sodium and potassium ions across the plasma membrane. This action creates the electrochemical gradient of sodium and potassium ions, providing the energy for active transport of various nutrients; Belongs to the cation trans…
			Car3	KO > WT	0.359	0.446	carbonic anhydrase 3 [Mus musculus]	Carbonic anhydrase III, muscle specific; Reversible hydration of carbon dioxide; Carbonic anhydrases
		YES	Ubap2l	KO < WT	0.361	-0.281	PREDICTED: ubiquitin-associated protein 2-like isoform X1 [Mus musculus]	Ubiquitin associated protein 2-like; Plays an important role in the activity of long-term repopulating hematopoietic stem cells (LT-HSCs).
		YES	Cops5	KO < WT	0.362	-0.236	COP9 signalosome complex subunit 5 isoform 1 [Mus musculus]	Jun activation domain-binding protein 1; Probable protease subunit of the COP9 signalosome complex (CSN), a complex involved in various cellular and developmental processes. The CSN complex is an essential regulator of the ubiquitin (Ubl) conjugation pathway by mediating the deneddylation of the cullin subunits of the SCF-type E3 ligase complexes, leading to decrease the Ubl ligase activity of SC…
		YES	Raly	KO < WT	0.362	-7.98	PREDICTED: RNA-binding protein Raly isoform X1 [Mus musculus]	hnRNP associated with lethal yellow protein homolog; RNA-binding protein that acts as a transcriptional cofactor for cholesterol biosynthetic genes in the liver. Binds the lipid-responsive non-coding RNA LeXis and is required for LeXis-mediated effect on cholesterogenesis (By similarity). May be a heterogeneous nuclear ribonucleoprotein (hnRNP); Belongs to the RRM HNRPC family. RALY subfamily.
			Map7d1	KO > WT	0.362	7.75	MAP7 domain-containing protein 1 isoform 1 [Mus musculus]	Arginine/proline-rich coiled-coil domain-containing protein 1; MAP7 domain containing 1; Belongs to the MAP7 family.
			Pygb	KO > WT	0.363	8.05	glycogen phosphorylase, brain form [Mus musculus]	Glycogen phosphorylase, brain form; Glycogen phosphorylase that regulates glycogen mobilization. Phosphorylase is an important allosteric enzyme in carbohydrate metabolism. Enzymes from different sources differ in their regulatory mechanisms and in their natural substrates. However, all known phosphorylases share catalytic and structural properties.
		YES	Cops2	KO > WT	0.364	7.84	COP9 signalosome complex subunit 2 isoform a [Mus musculus]	Thyroid receptor-interacting protein 15; Essential component of the COP9 signalosome complex (CSN), a complex involved in various cellular and developmental processes. The CSN complex is an essential regulator of the ubiquitin (Ubl) conjugation pathway by mediating the deneddylation of the cullin subunits of SCF-type E3 ligase complexes, leading to decrease the Ubl ligase activity of SCF-type com…
			Myh1	KO > WT	0.365	0.343	PREDICTED: myosin-1 isoform X1 [Mus musculus]_x000D_ myosin-4 [Mus musculus]_x000D_ myosin-8 [Mus musculus]	Myosin, heavy chain 1, skeletal muscle, adult; Muscle contraction; Belongs to the TRAFAC class myosin-kinesin ATPase superfamily. Myosin family.
		YES	Cul3	KO > WT	0.366	7.63	cullin-3 isoform 1 [Mus musculus]	Cullin 3; Core component of multiple cullin-RING-based BCR (BTB- CUL3-RBX1) E3 ubiquitin-protein ligase complexes which mediate the ubiquitination and subsequent proteasomal degradation of target proteins. BCR complexes and ARIH1 collaborate in tandem to mediate ubiquitination of target proteins. As a scaffold protein may contribute to catalysis through positioning of the substrate and the ubiqui…
		YES	Larp1	KO > WT	0.368	7.77	la-related protein 1 [Mus musculus]	La ribonucleoprotein domain family, member 1; RNA-binding protein that promotes translation of specific classes of mRNAs downstream of the mTORC1 complex. Associates with the mRNA 5'cap in an MTOR-dependent manner and associates with mRNAs containing a 5' terminal oligopyrimidine (5'TOP) motif, which is present in mRNAs encoding for ribosomal proteins and several components of the translation mac…
			Krt90	KO > WT	0.37	0.448	uncharacterized protein LOC239673 [Mus musculus]
			Ldhb	KO > WT	0.37	7.52	L-lactate dehydrogenase B chain isoform Ldhbx [Mus musculus]_x000D_ L-lactate dehydrogenase A chain isoform 2 [Mus musculus]	Renal carcinoma antigen NY-REN-46; Lactate dehydrogenase B; Belongs to the LDH/MDH superfamily. LDH family.
			Bgn	KO < WT	0.37	-0.214	PREDICTED: biglycan isoform X1 [Mus musculus]_x000D_ decorin preproprotein [Mus musculus]	Bone/cartilage proteoglycan I; May be involved in collagen fiber assembly; Small leucine rich repeat proteoglycans
		YES	Ptov1	KO > WT	0.371	8.04	prostate tumor-overexpressed gene 1 protein homolog [Mus musculus]	Activator interaction domain-containing protein 2; May activate transcription. Required for nuclear translocation of FLOT1. Promotes cell proliferation.
			Olfr646	KO > WT	0.373	7.98	PREDICTED: olfactory receptor 646 isoform X1 [Mus musculus]
YES (Depreux 2015)		YES	Matr3	KO < WT	0.374	-0.28	matrin-3 [Mus musculus]	Matrin 3; May play a role in transcription or may interact with other nuclear matrix proteins to form the internal fibrogranular network. In association with the SFPQ-NONO heteromer may play a role in nuclear retention of defective RNAs. Plays a role in the regulation of DNA virus-mediated innate immune response by assembling into the HDP-RNP complex, a complex that serves as a platform for IRF3 …
			Myh1	KO > WT	0.377	0.42	PREDICTED: myosin-1 isoform X1 [Mus musculus]_x000D_ PREDICTED: myosin-3 isoform X1 [Mus musculus]_x000D_ myosin-4 [Mus musculus]_x000D_ myosin-2 [Mus musculus]_x000D_ myosin-13 [Mus musculus]_x000D_ PREDICTED: myosin-7 isoform X1 [Mus musculus]	Myosin, heavy chain 1, skeletal muscle, adult; Muscle contraction; Belongs to the TRAFAC class myosin-kinesin ATPase superfamily. Myosin family.
			Spag9	KO > WT	0.378	7.55	PREDICTED: C-Jun-amino-terminal kinase-interacting protein 4 isoform X1 [Mus musculus]	Mitogen-activated protein kinase 8-interacting protein 4; The JNK-interacting protein (JIP) group of scaffold proteins selectively mediates JNK signaling by aggregating specific components of the MAPK cascade to form a functional JNK signaling module. Isoform 5 may play a role in spermatozoa-egg- interaction.
			Myh2	KO > WT	0.378	0.247	myosin-2 [Mus musculus]	Myosin, heavy chain 2, skeletal muscle, adult; Muscle contraction. Required for cytoskeleton organization (By similarity); Myosin heavy chains
		YES	Fhl3	KO > WT	0.379	0.233	PREDICTED: four and a half LIM domains protein 3 isoform X1 [Mus musculus]	Four and a half LIM domains 3
			LOC103089317	KO < WT	0.379	-0.193	PREDICTED: uncharacterized protein C9orf84 homolog [Mus musculus]
		YES	Kpnb1	KO < WT	0.379	-0.234	importin subunit beta-1 [Mus musculus]	Pore targeting complex 97 kDa subunit; Functions in nuclear protein import, either in association with an adapter protein, like an importin-alpha subunit, which binds to nuclear localization signals (NLS) in cargo substrates, or by acting as autonomous nuclear transport receptor. Acting autonomously, serves itself as NLS receptor. Docking of the importin/substrate complex to the nuclear pore comp…
		YES	Ugp2	KO > WT	0.38	7.8	UTP--glucose-1-phosphate uridylyltransferase isoform 1 [Mus musculus]	UTP--glucose-1-phosphate uridylyltransferase; Plays a central role as a glucosyl donor in cellular metabolic pathways; Belongs to the UDPGP type 1 family.
			Cacna2d1	KO > WT	0.383	3.76	PREDICTED: voltage-dependent calcium channel subunit alpha-2/delta-1 isoform X8 [Mus musculus]	Calcium channel, voltage-dependent, alpha 2/delta subunit 1; The alpha-2/delta subunit of voltage-dependent calcium channels regulates calcium current density and activation/inactivation kinetics of the calcium channel. Plays an important role in excitation-contraction coupling (By similarity).
		YES	Ube2m	KO < WT	0.386	-0.201	NEDD8-conjugating enzyme Ubc12 isoform 1 [Mus musculus]	Ubiquitin-conjugating enzyme E2 M; Accepts the ubiquitin-like protein NEDD8 from the UBA3- NAE1 E1 complex and catalyzes its covalent attachment to other proteins. The specific interaction with the E3 ubiquitin ligase RBX1, but not RBX2, suggests that the RBX1-UBE2M complex neddylates specific target proteins, such as CUL1, CUL2, CUL3 and CUL4. Involved in cell proliferation.
		YES	Ank1	KO < WT	0.388	-0.442	PREDICTED: ankyrin-1 isoform X16 [Mus musculus]	Ankyrin 1, erythrocytic; Attaches integral membrane proteins to cytoskeletal elements; binds to the erythrocyte membrane protein band 4.2, to Na-K ATPase, to the lymphocyte membrane protein GP85, and to the cytoskeletal proteins fodrin, tubulin, vimentin and desmin. Erythrocyte ankyrins also link spectrin (beta chain) to the cytoplasmic domain of the erythrocytes anion exchange protein; they reta…
			Rab15	KO > WT	0.39	0.134	ras-related protein Rab-15 isoform 1 [Mus musculus]	RAB15, member RAS oncogene family
		YES	Pkm	KO > WT	0.393	0.214	PREDICTED: pyruvate kinase PKM isoform X1 [Mus musculus]	Cytosolic thyroid hormone-binding protein; Glycolytic enzyme that catalyzes the transfer of a phosphoryl group from phosphoenolpyruvate (PEP) to ADP, generating ATP. Stimulates POU5F1-mediated transcriptional activation. Plays a general role in caspase independent cell death of tumor cells. The ratio between the highly active tetrameric form and nearly inactive dimeric form determines whether glu…
			Csl	KO > WT	0.393	0.196	citrate synthase-like protein [Mus musculus]	Chorionic somatomammotropin hormone-like 1; May be a novel gestational hormone required to compensate for absence of other members of the GH/CS cluster during gestation; Growth hormone family
			Myh1	KO > WT	0.393	0.5	PREDICTED: myosin-1 isoform X1 [Mus musculus]_x000D_ myosin-4 [Mus musculus]_x000D_ myosin-2 [Mus musculus]_x000D_ myosin-13 [Mus musculus]	Myosin, heavy chain 1, skeletal muscle, adult; Muscle contraction; Belongs to the TRAFAC class myosin-kinesin ATPase superfamily. Myosin family.
			Lrrc10b	KO < WT	0.393	-0.497	leucine-rich repeat-containing protein 10B [Mus musculus]	Leucine-rich repeat-containing protein 10B; Leucine rich repeat containing 10B
			Rtn2	KO < WT	0.394	-0.0764	reticulon-2 isoform C [Mus musculus]	Neuroendocrine-specific protein-like 1; Reticulon 2
			Myoz3	KO < WT	0.394	-0.2	myozenin-3 [Mus musculus]	FATZ-related protein 3; Myozenins may serve as intracellular binding proteins involved in linking Z line proteins such as alpha-actinin, gamma- filamin, TCAP/telethonin, LDB3/ZASP and localizing calcineurin signaling to the sarcomere. Plays an important role in the modulation of calcineurin signaling. May play a role in myofibrillogenesis.
YES (Roux 2012)		YES	Pcbp1	KO < WT	0.395	-0.169	poly(rC)-binding protein 1 [Mus musculus]	Heterogeneous nuclear ribonucleoprotein E1; Single-stranded nucleic acid binding protein that binds preferentially to oligo dC. In case of infection by poliovirus, plays a role in initiation of viral RNA replication in concert with the viral protein 3CD.
			Farsb	KO > WT	0.396	7.24	phenylalanine--tRNA ligase beta subunit [Mus musculus]	phenylalanyl-tRNA synthetase beta subunit; Aminoacyl tRNA synthetases, Class II
			Trim72	KO < WT	0.398	-0.171	PREDICTED: tripartite motif-containing protein 72 isoform X1 [Mus musculus]	Tripartite motif containing 72, E3 ubiquitin protein ligase; Muscle-specific protein that plays a central role in cell membrane repair by nucleating the assembly of the repair machinery at injury sites. Specifically binds phosphatidylserine. Acts as a sensor of oxidation: upon membrane damage, entry of extracellular oxidative environment results in disulfide bond formation and homooligomerization…
			Tuba3b	KO < WT	0.398	-0.172	tubulin alpha-3 chain [Mus musculus]_x000D_ tubulin alpha-1A chain [Mus musculus]_x000D_ tubulin alpha-4A chain isoform 1 [Mus musculus]
			Ckm	KO > WT	0.401	0.171	creatine kinase M-type [Mus musculus]	Creatine kinase M chain; Reversibly catalyzes the transfer of phosphate between ATP and various phosphogens (e.g. creatine phosphate). Creatine kinase isoenzymes play a central role in energy transduction in tissues with large, fluctuating energy demands, such as skeletal muscle, heart, brain and spermatozoa.
			Col6a2	KO < WT	0.402	-0.165	collagen alpha-2(VI) chain isoform 1 precursor [Mus musculus]	Collagen alpha-2(VI) chain; Collagen VI acts as a cell-binding protein; Collagens
			Rasal3	KO > WT	0.402	0.433	PREDICTED: RAS protein activator like-3 isoform X1 [Mus musculus]	RAS protein activator like 3; Functions as a Ras GTPase-activating protein. Plays an important role in the expansion and functions of natural killer T (NKT) cells in the liver by negatively regulating RAS activity and the down-stream ERK signaling pathway; C2 and RasGAP domain containing
			Col24a1	KO > WT	0.403	3.61	PREDICTED: collagen alpha-1(XXIV) chain isoform X1 [Mus musculus]	Collagen alpha-1(XXIV) chain; May participate in regulating type I collagen fibrillogenesis at specific anatomical locations during fetal development; Belongs to the fibrillar collagen family.
		YES	H1f0	KO < WT	0.41	-0.202	histone H1.0 [Mus musculus]	H1 histone family, member 0; Histones H1 are necessary for the condensation of nucleosome chains into higher-order structures. The H1F0 histones are found in cells that are in terminal stages of differentiation or that have low rates of cell division.
			Dync1h1	KO < WT	0.414	-0.216	cytoplasmic dynein 1 heavy chain 1 [Mus musculus]	Dynein, cytoplasmic 1, heavy chain 1; Cytoplasmic dynein 1 acts as a motor for the intracellular retrograde motility of vesicles and organelles along microtubules. Dynein has ATPase activity; the force-producing power stroke is thought to occur on release of ADP. Plays a role in mitotic spindle assembly and metaphase plate congression; Belongs to the dynein heavy chain family.
		YES	Upf1	KO < WT	0.415	-0.283	PREDICTED: regulator of nonsense transcripts 1 isoform X1 [Mus musculus]	UPF1 regulator of nonsense transcripts homolog (yeast); RNA-dependent helicase and ATPase required for nonsense- mediated decay (NMD) of mRNAs containing premature stop codons. Is recruited to mRNAs upon translation termination and undergoes a cycle of phosphorylation and dephosphorylation; its phosphorylation appears to be a key step in NMD. Recruited by release factors to stalled ribosomes toge…
		YES	Gps1	KO < WT	0.415	-0.214	PREDICTED: COP9 signalosome complex subunit 1 isoform X1 [Mus musculus]	JAB1-containing signalosome subunit 1; Essential component of the COP9 signalosome complex (CSN), a complex involved in various cellular and developmental processes. The CSN complex is an essential regulator of the ubiquitin (Ubl) conjugation pathway by mediating the deneddylation of the cullin subunits of SCF-type E3 ligase complexes, leading to decrease the Ubl ligase activity of SCF-type compl…
			Myh1	KO > WT	0.418	0.277	PREDICTED: myosin-1 isoform X1 [Mus musculus]_x000D_ PREDICTED: myosin-3 isoform X1 [Mus musculus]_x000D_ myosin-4 [Mus musculus]_x000D_ myosin-2 [Mus musculus]_x000D_ PREDICTED: myosin-7 isoform X1 [Mus musculus]_x000D_ myosin-8 [Mus musculus]	Myosin, heavy chain 1, skeletal muscle, adult; Muscle contraction; Belongs to the TRAFAC class myosin-kinesin ATPase superfamily. Myosin family.
			Zfyve19	KO > WT	0.418	0.258	PREDICTED: abscission/NoCut checkpoint regulator isoform X1 [Mus musculus]	Zinc finger FYVE domain-containing protein 19; Key regulator of abscission step in cytokinesis: part of the cytokinesis checkpoint, a process required to delay abscission to prevent both premature resolution of intercellular chromosome bridges and accumulation of DNA damage. Together with CHMP4C, required to retain abscission-competent VPS4 (VPS4A and/or VPS4B) at the midbody ring until abscissio…
			Gmppa	KO > WT	0.418	3.52	PREDICTED: mannose-1-phosphate guanyltransferase alpha isoform X1 [Mus musculus]	GTP-mannose-1-phosphate guanylyltransferase alpha; May serve as a regulatory subunit and allow allosteric feedback inhibition of GMPPB by GDP-mannose.
		YES	Map1s	KO < WT	0.422	-0.532	microtubule-associated protein 1S [Mus musculus]	Variable charge Y chromosome 2-interacting protein 1; Microtubule-associated protein that mediates aggregation of mitochondria resulting in cell death and genomic destruction (MAGD). Plays a role in anchoring the microtubule organizing center to the centrosomes. Binds to DNA. Plays a role in apoptosis. Involved in the formation of microtubule bundles (By similarity); Belongs to the MAP1 family.
			Ccdc33	KO > WT	0.426	0.626	PREDICTED: coiled-coil domain-containing protein 33 isoform X1 [Mus musculus]	Coiled-coil domain containing 33
		YES	Ehd2	KO > WT	0.429	0.133	PREDICTED: EH domain-containing protein 2 isoform X1 [Mus musculus]	EH domain-containing protein 2; ATP- and membrane-binding protein that controls membrane reorganization/tubulation upon ATP hydrolysis (By similarity). Plays a role in membrane trafficking between the plasma membrane and endosomes. Important for the internalization of GLUT4. Required for fusion of myoblasts to skeletal muscle myotubes. Required for normal translocation of FER1L5 to the plasma mem…
		YES	Nme2	KO > WT	0.431	0.18	nucleoside diphosphate kinase B [Mus musculus]	NME/NM23 nucleoside diphosphate kinase 2; Major role in the synthesis of nucleoside triphosphates other than ATP. Negatively regulates Rho activity by interacting with AKAP13/LBC. Acts as a transcriptional activator of the MYC gene; binds DNA non-specifically. Exhibits histidine protein kinase activity; NME/NM23 family
			Gipc3	KO > WT	0.431	0.374	PDZ domain-containing protein GIPC3 [Mus musculus]	GIPC PDZ domain containing family, member 3; Required for postnatal maturation of the hair bundle and long-term survival of hair cells and spiral ganglion; Deafness associated genes
		YES	Cand2	KO < WT	0.436	-0.135	cullin-associated NEDD8-dissociated protein 2 [Mus musculus]	Cullin-associated and neddylation-dissociated 2 (putative); Probable assembly factor of SCF (SKP1-CUL1-F-box protein) E3 ubiquitin ligase complexes that promotes the exchange of the substrate-recognition F-box subunit in SCF complexes, thereby playing a key role in the cellular repertoire of SCF complexes; Belongs to the CAND family.
			Kti12	KO < WT	0.437	-0.231	protein KTI12 homolog [Mus musculus]	KTI12 chromatin associated homolog
			Idh1	KO > WT	0.437	0.0942	isocitrate dehydrogenase [NADP] cytoplasmic [Mus musculus]	Isocitrate dehydrogenase 1, cytosolic
			Capns1	KO < WT	0.44	-0.25	PREDICTED: calpain small subunit 1 isoform X1 [Mus musculus]	Calcium-activated neutral proteinase small subunit; Regulatory subunit of the calcium-regulated non- lysosomal thiol-protease which catalyzes limited proteolysis of substrates involved in cytoskeletal remodeling and signal transduction; EF-hand domain containing
		YES	Camk2a	KO < WT	0.444	-0.0949	PREDICTED: calcium/calmodulin-dependent protein kinase type II subunit alpha isoform X1 [Mus musculus]	Calcium/calmodulin-dependent protein kinase type II subunit alpha; CaM-kinase II (CAMK2) is a prominent kinase in the central nervous system that may function in long-term potentiation and neurotransmitter release. Member of the NMDAR signaling complex in excitatory synapses it may regulate NMDAR-dependent potentiation of the AMPAR and synaptic plasticity (By similarity). Phosphorylates transcrip…
			1700009N14Rik	KO > WT	0.449	0.286	uncharacterized protein LOC75471 [Mus musculus]
			Myh3	KO < WT	0.449	-0.52	PREDICTED: myosin-3 isoform X1 [Mus musculus]_x000D_ myosin-4 [Mus musculus]	Myosin heavy chain, fast skeletal muscle, embryonic; Muscle contraction; Belongs to the TRAFAC class myosin-kinesin ATPase superfamily. Myosin family.
			Plbd2	KO < WT	0.462	-0.402	putative phospholipase B-like 2 precursor [Mus musculus]	Phospholipase B domain-containing protein 2; Putative phospholipase.
			Myh4	KO < WT	0.464	-0.21	myosin-4 [Mus musculus]_x000D_ myosin-8 [Mus musculus]	Myosin heavy chain, skeletal muscle, fetal; Muscle contraction; Myosin heavy chains
			Myh4	KO > WT	0.465	0.154	myosin-4 [Mus musculus]_x000D_ myosin-2 [Mus musculus]_x000D_ myosin-13 [Mus musculus]_x000D_ myosin-8 [Mus musculus]	Myosin heavy chain, skeletal muscle, fetal; Muscle contraction; Myosin heavy chains
		YES	Map2k4	KO < WT	0.469	-0.18	dual specificity mitogen-activated protein kinase kinase 4 isoform a [Mus musculus]	Dual specificity mitogen-activated protein kinase kinase 4; Dual specificity protein kinase which acts as an essential component of the MAP kinase signal transduction pathway. Essential component of the stress-activated protein kinase/c-Jun N-terminal kinase (SAP/JNK) signaling pathway. With MAP2K7/MKK7, is the one of the only known kinase to directly activate the stress-activated protein kinase/…
		YES	Tubb4a	KO < WT	0.469	-0.194	tubulin beta-4A chain [Mus musculus]	Tubulin, beta 4A class IVa; Tubulin is the major constituent of microtubules. It binds two moles of GTP, one at an exchangeable site on the beta chain and one at a non-exchangeable site on the alpha chain; Tubulins
			Cct7	KO > WT	0.47	0.212	T-complex protein 1 subunit eta [Mus musculus]	Chaperonin containing TCP1, subunit 7 (eta); Molecular chaperone; assists the folding of proteins upon ATP hydrolysis. Known to play a role, in vitro, in the folding of actin and tubulin (By similarity); Chaperonins
		YES	Eef2	KO < WT	0.47	-0.123	elongation factor 2 [Mus musculus]	Eukaryotic translation elongation factor 2; Catalyzes the GTP-dependent ribosomal translocation step during translation elongation. During this step, the ribosome changes from the pre-translocational (PRE) to the post- translocational (POST) state as the newly formed A-site-bound peptidyl-tRNA and P-site-bound deacylated tRNA move to the P and E sites, respectively. Catalyzes the coordinated move…
			Atg3	KO > WT	0.472	0.132	ubiquitin-like-conjugating enzyme ATG3 [Mus musculus]	Ubiquitin-like-conjugating enzyme ATG3; E2 conjugating enzyme required for the cytoplasm to vacuole transport (Cvt), autophagy, and mitochondrial homeostasis. Responsible for the E2-like covalent binding of phosphatidylethanolamine to the C-terminal Gly of ATG8-like proteins (GABARAP, GABARAPL1, GABARAPL2 or MAP1LC3A). The ATG12- ATG5 conjugate plays a role of an E3 and promotes the transfer of A…
			Bcl2l13	KO < WT	0.473	-0.165	bcl-2-like protein 13 [Mus musculus]	BCL2-like 13 (apoptosis facilitator); May promote the activation of caspase-3 and apoptosis; BCL2 family
		YES	Aldoa	KO > WT	0.476	0.158	PREDICTED: fructose-bisphosphate aldolase A isoform X1 [Mus musculus]	Aldolase A, fructose-bisphosphate; Plays a key role in glycolysis and gluconeogenesis. In addition, may also function as scaffolding protein (By similarity); Belongs to the class I fructose-bisphosphate aldolase family.
		YES	Sh3d21	KO < WT	0.477	-0.277	PREDICTED: SH3 domain-containing protein 21 isoform X1 [Mus musculus]	SH3 domain containing 21
		YES	Dennd4b	KO < WT	0.481	-7.72	PREDICTED: DENN domain-containing protein 4B isoform X1 [Mus musculus]	DENN domain-containing protein 4B; Guanine nucleotide exchange factor (GEF) which may activate RAB10. Promotes the exchange of GDP to GTP, converting inactive GDP-bound Rab proteins into their active GTP-bound form; DENN/MADD domain containing
		YES	Ube2n	KO > WT	0.487	0.222	PREDICTED: ubiquitin-conjugating enzyme E2 N isoform X1 [Mus musculus]	Bendless-like ubiquitin-conjugating enzyme; The UBE2V1-UBE2N and UBE2V2-UBE2N heterodimers catalyze the synthesis of non-canonical 'Lys-63'-linked polyubiquitin chains. This type of polyubiquitination does not lead to protein degradation by the proteasome. Mediates transcriptional activation of target genes. Plays a role in the control of progress through the cell cycle and differentiation. Plays…
			Lum	KO < WT	0.49	-0.0828	lumican precursor [Mus musculus]	Keratan sulfate proteoglycan lumican; Small leucine rich repeat proteoglycans; Belongs to the small leucine-rich proteoglycan (SLRP) family. SLRP class II subfamily.
			Rab11b	KO > WT	0.491	0.171	ras-related protein Rab-11B [Mus musculus]	RAB11B, member RAS oncogene family; The small GTPases Rab are key regulators of intracellular membrane trafficking, from the formation of transport vesicles to their fusion with membranes. Rabs cycle between an inactive GDP-bound form and an active GTP-bound form that is able to recruit to membranes different set of downstream effectors directly responsible for vesicle formation, movement, tether…
		YES	Adrm1	KO < WT	0.492	-4.42	PREDICTED: proteasomal ubiquitin receptor ADRM1 isoform X1 [Mus musculus]	Proteasome regulatory particle non-ATPase 13; Component of the 26S proteasome, a multiprotein complex involved in the ATP-dependent degradation of ubiquitinated proteins. This complex plays a key role in the maintenance of protein homeostasis by removing misfolded or damaged proteins, which could impair cellular functions, and by removing proteins whose functions are no longer required. Therefore…
			Myh1	KO > WT	0.493	0.183	PREDICTED: myosin-1 isoform X1 [Mus musculus]_x000D_ PREDICTED: myosin-3 isoform X1 [Mus musculus]_x000D_ myosin-4 [Mus musculus]_x000D_ myosin-2 [Mus musculus]_x000D_ myosin-8 [Mus musculus]	Myosin, heavy chain 1, skeletal muscle, adult; Muscle contraction; Belongs to the TRAFAC class myosin-kinesin ATPase superfamily. Myosin family.
			Myh1	KO < WT	0.493	-0.203	PREDICTED: myosin-1 isoform X1 [Mus musculus]_x000D_ PREDICTED: myosin-3 isoform X1 [Mus musculus]_x000D_ myosin-4 [Mus musculus]_x000D_ myosin-2 [Mus musculus]	Myosin, heavy chain 1, skeletal muscle, adult; Muscle contraction; Belongs to the TRAFAC class myosin-kinesin ATPase superfamily. Myosin family.
			Prss1	KO < WT	0.494	-0.551	protease, serine, 1 precursor [Mus musculus]	Protease, serine, 1 (trypsin 1); Has activity against the synthetic substrates Boc-Phe- Ser-Arg-Mec, Boc-Leu-Thr-Arg-Mec, Boc-Gln-Ala-Arg-Mec and Boc-Val- Pro-Arg-Mec. The single-chain form is more active than the two- chain form against all of these substrates; Belongs to the peptidase S1 family.
			Myh4	KO < WT	0.494	-0.126	myosin-4 [Mus musculus]_x000D_ myosin-13 [Mus musculus]_x000D_ PREDICTED: myosin-7 isoform X1 [Mus musculus]	Myosin heavy chain, skeletal muscle, fetal; Muscle contraction; Myosin heavy chains
			Casq2	KO > WT	0.496	0.223	PREDICTED: calsequestrin-2 isoform X1 [Mus musculus]	Calsequestrin, cardiac muscle isoform; Calsequestrin is a high-capacity, moderate affinity, calcium-binding protein and thus acts as an internal calcium store in muscle. Calcium ions are bound by clusters of acidic residues at the protein surface, especially at the interface between subunits. Can bind around 60 Ca(2+) ions. Regulates the release of lumenal Ca(2+) via the calcium release channel R…
			Atp2a1	KO > WT	0.498	0.167	PREDICTED: sarcoplasmic/endoplasmic reticulum calcium ATPase 1 isoform X1 [Mus musculus]	Calcium-transporting ATPase sarcoplasmic reticulum type, fast twitch skeletal muscle isoform; Key regulator of striated muscle performance by acting as the major Ca(2+) ATPase responsible for the reuptake of cytosolic Ca(2+) into the sarcoplasmic reticulum. Catalyzes the hydrolysis of ATP coupled with the translocation of calcium from the cytosol to the sarcoplasmic reticulum lumen. Contributes t…
		YES	Nampt	KO < WT	0.499	-0.196	nicotinamide phosphoribosyltransferase [Mus musculus]	Nicotinamide phosphoribosyltransferase; Catalyzes the condensation of nicotinamide with 5- phosphoribosyl-1-pyrophosphate to yield nicotinamide mononucleotide, an intermediate in the biosynthesis of NAD. It is the rate limiting component in the mammalian NAD biosynthesis pathway. The secreted form behaves both as a cytokine with immunomodulating properties and an adipokine with anti-diabetic prop…
			Tnnt1	KO > WT	0.503	0.208	PREDICTED: troponin T, slow skeletal muscle isoform X1 [Mus musculus]
			Snta1	KO < WT	0.504	-0.137	alpha-1-syntrophin [Mus musculus]	59 kDa dystrophin-associated protein A1 acidic component 1; Adapter protein that binds to and probably organizes the subcellular localization of a variety of membrane proteins. May link various receptors to the actin cytoskeleton and the extracellular matrix via the dystrophin glycoprotein complex. Plays an important role in synapse formation and in the organization of UTRN and acetylcholine rece…
			Myh1	KO > WT	0.505	0.344	PREDICTED: myosin-1 isoform X1 [Mus musculus]_x000D_ myosin-4 [Mus musculus]_x000D_ myosin-2 [Mus musculus]_x000D_ myosin-13 [Mus musculus]_x000D_ myosin-8 [Mus musculus]	Myosin, heavy chain 1, skeletal muscle, adult; Muscle contraction; Belongs to the TRAFAC class myosin-kinesin ATPase superfamily. Myosin family.
		YES	Park7	KO > WT	0.518	0.153	protein DJ-1 [Mus musculus]	Protein/nucleic acid deglycase DJ-1; Protein and nucleotide deglycase that catalyzes the deglycation of the Maillard adducts formed between amino groups of proteins or nucleotides and reactive carbonyl groups of glyoxals. Thus, functions as a protein deglycase that repairs methylglyoxal- and glyoxal-glycated proteins, and releases repaired proteins and lactate or glycolate, respectively. Deglycat…
			Myh1	KO < WT	0.519	-0.165	PREDICTED: myosin-1 isoform X1 [Mus musculus]_x000D_ myosin-4 [Mus musculus]_x000D_ myosin-2 [Mus musculus]_x000D_ PREDICTED: myosin-7 isoform X1 [Mus musculus]	Myosin, heavy chain 1, skeletal muscle, adult; Muscle contraction; Belongs to the TRAFAC class myosin-kinesin ATPase superfamily. Myosin family.
			Oxsr1	KO < WT	0.52	-0.158	PREDICTED: serine/threonine-protein kinase OSR1 isoform X1 [Mus musculus]	Oxidative stress-responsive 1 protein; Regulates downstream kinases in response to environmental stress. May also have a function in regulating the actin cytoskeleton; Belongs to the protein kinase superfamily. STE Ser/Thr protein kinase family. STE20 subfamily.
			Olfr703	KO < WT	0.52	-0.136	olfactory receptor 703 [Mus musculus]
			Tnnc2	KO > WT	0.522	0.394	troponin C, skeletal muscle [Mus musculus]	Troponin C, skeletal muscle; Troponin is the central regulatory protein of striated muscle contraction. Tn consists of three components: Tn-I which is the inhibitor of actomyosin ATPase, Tn-T which contains the binding site for tropomyosin and Tn-C. The binding of calcium to Tn-C abolishes the inhibitory action of Tn on actin filaments; EF-hand domain containing
			Actn3	KO > WT	0.53	0.152	alpha-actinin-3 [Mus musculus]	Alpha-actinin skeletal muscle isoform 3; F-actin cross-linking protein which is thought to anchor actin to a variety of intracellular structures. This is a bundling protein; Actinins
			Plin4	KO < WT	0.531	-0.234	perilipin-4 [Mus musculus]	Adipocyte protein S3-12; May play a role in triacylglycerol packaging into adipocytes. May function as a coat protein involved in the biogenesis of lipid droplets (By similarity); Belongs to the perilipin family.
		YES	Bag3	KO < WT	0.534	-8.07	BAG family molecular chaperone regulator 3 [Mus musculus]	BAG family molecular chaperone regulator 3; Co-chaperone for HSP70 and HSC70 chaperone proteins. Acts as a nucleotide-exchange factor (NEF) promoting the release of ADP from the HSP70 and HSC70 proteins thereby triggering client/substrate protein release. Nucleotide release is mediated via its binding to the nucleotide-binding domain (NBD) of HSPA8/HSC70 where as the substrate release is mediated…
		YES	Alb	KO > WT	0.535	0.137	serum albumin preproprotein [Mus musculus]	Serum albumin; Serum albumin, the main protein of plasma, has a good binding capacity for water, Ca(2+), Na(+), K(+), fatty acids, hormones, bilirubin and drugs. Its main function is the regulation of the colloidal osmotic pressure of blood. Major zinc transporter in plasma, typically binds about 80% of all plasma zinc; Belongs to the ALB/AFP/VDB family.
		YES	Pdk2	KO < WT	0.536	-0.147	pyruvate dehydrogenase kinase, isoenzyme 2 [Mus musculus]	[Pyruvate dehydrogenase (acetyl-transferring)] kinase isozyme 2, mitochondrial; Kinase that plays a key role in the regulation of glucose and fatty acid metabolism and homeostasis via phosphorylation of the pyruvate dehydrogenase subunits PDHA1 and PDHA2. This inhibits pyruvate dehydrogenase activity, and thereby regulates metabolite flux through the tricarboxylic acid cycle, down-regulates aerob…
			Farsa	KO > WT	0.537	4.13	phenylalanine--tRNA ligase alpha subunit [Mus musculus]	phenylalanyl-tRNA synthetase alpha subunit; Aminoacyl tRNA synthetases, Class II
			Nefl	KO > WT	0.54	0.0785	neurofilament light polypeptide [Mus musculus]	Neurofilament, light polypeptide; Neurofilaments usually contain three intermediate filament proteins: L, M, and H which are involved in the maintenance of neuronal caliber.
		YES	Cct8	KO < WT	0.54	-0.077	T-complex protein 1 subunit theta [Mus musculus]	Chaperonin containing TCP1, subunit 8 (theta); Molecular chaperone; assists the folding of proteins upon ATP hydrolysis. As part of the BBS/CCT complex may play a role in the assembly of BBSome, a complex involved in ciliogenesis regulating transports vesicles to the cilia. Known to play a role, in vitro, in the folding of actin and tubulin; Belongs to the TCP-1 chaperonin family.
			Pygm	KO > WT	0.541	0.146	glycogen phosphorylase, muscle form [Mus musculus]_x000D_ glycogen phosphorylase, brain form [Mus musculus]	Glycogen phosphorylase, muscle form; Phosphorylase is an important allosteric enzyme in carbohydrate metabolism. Enzymes from different sources differ in their regulatory mechanisms and in their natural substrates. However, all known phosphorylases share catalytic and structural properties.
			Igbp1b	KO > WT	0.543	7.91	immunoglobulin-binding protein 1b [Mus musculus]
		YES	Tuba1a	KO < WT	0.544	-0.129	tubulin alpha-1A chain [Mus musculus]	Tubulin alpha-1A chain; Tubulin is the major constituent of microtubules. It binds two moles of GTP, one at an exchangeable site on the beta chain and one at a non-exchangeable site on the alpha chain; Tubulins
			Vapb	KO < WT	0.544	-0.158	vesicle-associated membrane protein-associated protein B [Mus musculus]	VAMP (vesicle-associated membrane protein)-associated protein B and C; Participates in the endoplasmic reticulum unfolded protein response (UPR) by inducing ERN1/IRE1 activity. Involved in cellular calcium homeostasis regulation.
		YES	Smc3	KO > WT	0.549	7.72	structural maintenance of chromosomes protein 3 [Mus musculus]	Basement membrane-associated chondroitin proteoglycan; Central component of cohesin, a complex required for chromosome cohesion during the cell cycle. The cohesin complex may form a large proteinaceous ring within which sister chromatids can be trapped. At anaphase, the complex is cleaved and dissociates from chromatin, allowing sister chromatids to segregate. Cohesion is coupled to DNA replicati…
			Myh4	KO < WT	0.551	-0.123	myosin-4 [Mus musculus]_x000D_ PREDICTED: myosin-7 isoform X1 [Mus musculus]_x000D_ myosin-8 [Mus musculus]	Myosin heavy chain, skeletal muscle, fetal; Muscle contraction; Myosin heavy chains
		YES	Tubb4b	KO < WT	0.551	-0.12	tubulin beta-4B chain [Mus musculus]	Tubulin, beta 4B class IVb; Tubulin is the major constituent of microtubules. It binds two moles of GTP, one at an exchangeable site on the beta chain and one at a non-exchangeable site on the alpha chain; Belongs to the tubulin family.
		YES	Dctn1	KO > WT	0.555	3.89	dynactin subunit 1 isoform 1 [Mus musculus]	150 kDa dynein-associated polypeptide; Plays a key role in dynein-mediated retrograde transport of vesicles and organelles along microtubules by recruiting and tethering dynein to microtubules. Binds to both dynein and microtubules providing a link between specific cargos, microtubules and dynein. Essential for targeting dynein to microtubule plus ends, recruiting dynein to membranous cargos and …
			Arf5	KO > WT	0.558	0.176	ADP-ribosylation factor 5 [Mus musculus]	ADP-ribosylation factor 5; GTP-binding protein that functions as an allosteric activator of the cholera toxin catalytic subunit, an ADP- ribosyltransferase. Involved in protein trafficking; may modulate vesicle budding and uncoating within the Golgi apparatus; ARF GTPase family
		YES	Map2k3	KO < WT	0.56	-0.0852	dual specificity mitogen-activated protein kinase kinase 3 [Mus musculus]	Dual specificity mitogen-activated protein kinase kinase 3; Dual specificity kinase. Is activated by cytokines and environmental stress in vivo. Catalyzes the concomitant phosphorylation of a threonine and a tyrosine residue in the MAP kinase p38. Part of a signaling cascade that begins with the activation of the adrenergic receptor ADRA1B and leads to the activation of MAPK14; Belongs to the pro…
			Eef1a2	KO < WT	0.561	-0.118	elongation factor 1-alpha 2 [Mus musculus]	Eukaryotic translation elongation factor 1 alpha 2; This protein promotes the GTP-dependent binding of aminoacyl-tRNA to the A-site of ribosomes during protein biosynthesis; Belongs to the TRAFAC class translation factor GTPase superfamily. Classic translation factor GTPase family. EF-Tu/EF-1A subfamily.
			Pgm5	KO > WT	0.567	0.201	phosphoglucomutase-like protein 5 [Mus musculus]	Phosphoglucomutase-related protein; Component of adherens-type cell-cell and cell-matrix junctions. Lacks phosphoglucomutase activity.
		YES	Hsp90aa1	KO < WT	0.568	-0.121	heat shock protein HSP 90-alpha [Mus musculus]_x000D_ heat shock protein HSP 90-beta [Mus musculus]	Heat shock protein 90kDa alpha (cytosolic), class A member 1; Molecular chaperone that promotes the maturation, structural maintenance and proper regulation of specific target proteins involved for instance in cell cycle control and signal transduction. Undergoes a functional cycle that is linked to its ATPase activity which is essential for its chaperone activity. This cycle probably induces con…
			H2bc22	KO < WT	0.568	-0.179	histone H2B type 1-P isoform 1 [Mus musculus]
		YES	Tipin	KO > WT	0.569	7.85	PREDICTED: TIMELESS-interacting protein isoform X1 [Mus musculus]	TIMELESS interacting protein; Plays an important role in the control of DNA replication and the maintenance of replication fork stability. Important for cell survival after DNA damage or replication stress. May be specifically required for the ATR-CHEK1 pathway in the replication checkpoint induced by hydroxyurea or ultraviolet light. Forms a complex with TIMELESS and this complex regulates DNA r…
			Apoa1	KO > WT	0.571	0.1	apolipoprotein A-I preproprotein [Mus musculus]	Apolipoprotein A-I; Participates in the reverse transport of cholesterol from tissues to the liver for excretion by promoting cholesterol efflux from tissues and by acting as a cofactor for the lecithin cholesterol acyltransferase (LCAT). As part of the SPAP complex, activates spermatozoa motility; Apolipoproteins
			Gm6749	KO > WT	0.573	0.137	PREDICTED: histone H3.3-like [Mus musculus]
			Xirp2	KO < WT	0.574	-0.173	xin actin-binding repeat-containing protein 2 isoform 1 [Mus musculus]	Xin actin-binding repeat-containing protein 2; Protects actin filaments from depolymerization; Belongs to the Xin family.
		YES	Tubb4a	KO < WT	0.576	-0.182	tubulin beta-4A chain [Mus musculus]_x000D_ tubulin beta-4B chain [Mus musculus]	Tubulin, beta 4A class IVa; Tubulin is the major constituent of microtubules. It binds two moles of GTP, one at an exchangeable site on the beta chain and one at a non-exchangeable site on the alpha chain; Tubulins
			Tpm1	KO > WT	0.577	0.227	tropomyosin alpha-1 chain isoform Tpm1.1st [Mus musculus]	Tropomyosin alpha-1 chain; Tropomyosin 1; Tropomyosins
		YES	Thrap3	KO < WT	0.584	-0.293	PREDICTED: thyroid hormone receptor-associated protein 3 isoform X1 [Mus musculus]	Thyroid hormone receptor-associated protein complex 150 kDa component; Involved in pre-mRNA splicing. Remains associated with spliced mRNA after splicing which probably involves interactions with the exon junction complex (EJC). Can trigger mRNA decay which seems to be independent of nonsense-mediated decay involving premature stop codons (PTC) recognition. May be involved in nuclear mRNA decay. …
		YES	Sirt2	KO > WT	0.585	3.89	PREDICTED: NAD-dependent protein deacetylase sirtuin-2 isoform X1 [Mus musculus]	NAD-dependent protein deacetylase sirtuin-2; NAD-dependent protein deacetylase, which deacetylates internal lysines on histone and alpha-tubulin as well as many other proteins such as key transcription factors. Participates in the modulation of multiple and diverse biological processes such as cell cycle control, genomic integrity, microtubule dynamics, cell differentiation, metabolic networks, a…
			Tuba4a	KO < WT	0.59	-0.185	tubulin alpha-4A chain isoform 1 [Mus musculus]	Testis-specific alpha-tubulin; Tubulin is the major constituent of microtubules. It binds two moles of GTP, one at an exchangeable site on the beta chain and one at a non-exchangeable site on the alpha chain; Tubulins
			Myh1	KO > WT	0.592	0.126	PREDICTED: myosin-1 isoform X1 [Mus musculus]_x000D_ myosin-4 [Mus musculus]	Myosin, heavy chain 1, skeletal muscle, adult; Muscle contraction; Belongs to the TRAFAC class myosin-kinesin ATPase superfamily. Myosin family.
		YES	Ankrd2	KO < WT	0.593	-0.221	ankyrin repeat domain-containing protein 2 [Mus musculus]	Ankyrin repeat domain 2 (stretch responsive muscle); Functions as a negative regulator of myocyte differentiation. May interact with both sarcoplasmic structural proteins and nuclear proteins to regulate gene expression during muscle development and in response to muscle stress; Ankyrin repeat domain containing
		YES	Jph1	KO > WT	0.594	0.108	PREDICTED: junctophilin-1 isoform X1 [Mus musculus]	Junctophilin type 1; Junctophilins contribute to the formation of junctional membrane complexes (JMCs) which link the plasma membrane with the endoplasmic or sarcoplasmic reticulum in excitable cells. Provides a structural foundation for functional cross-talk between the cell surface and intracellular calcium release channels. JPH1 contributes to the construction of the skeletal muscle triad by l…
		YES	Prdm2	KO > WT	0.597	0.247	PREDICTED: PR domain zinc finger protein 2 isoform X1 [Mus musculus]	Retinoblastoma protein-interacting zinc finger protein; S-adenosyl-L-methionine-dependent histone methyltransferase that specifically methylates 'Lys-9' of histone H3. May function as a DNA-binding transcription factor. Binds to the macrophage-specific TPA-responsive element (MTE) of the HMOX1 (heme oxygenase 1) gene and may act as a transcriptional activator of this gene; Belongs to the class V-…
		YES	Hnrnpu	KO < WT	0.602	-0.197	PREDICTED: heterogeneous nuclear ribonucleoprotein U isoform X1 [Mus musculus]	Heterogeneous nuclear ribonucleoprotein U (scaffold attachment factor A); DNA- and RNA-binding protein involved in several cellular processes such as nuclear chromatin organization, telomere-length regulation, transcription, mRNA alternative splicing and stability, Xist-mediated transcriptional silencing and mitotic cell progression. Plays a role in the regulation of interphase large-scale gene-r…
			Eno3	KO > WT	0.602	0.142	PREDICTED: alpha-enolase isoform X1 [Mus musculus]_x000D_ PREDICTED: beta-enolase isoform X1 [Mus musculus]	2-phospho-D-glycerate hydro-lyase; Appears to have a function in striated muscle development and regeneration; Belongs to the enolase family.
			Arf1	KO < WT	0.604	-0.128	ADP-ribosylation factor 1 [Mus musculus]	ADP-ribosylation factor 1; GTP-binding protein that functions as an allosteric activator of the cholera toxin catalytic subunit, an ADP- ribosyltransferase. Involved in protein trafficking among different compartments. Modulates vesicle budding and uncoating within the Golgi complex. Deactivation induces the redistribution of the entire Golgi complex to the endoplasmic reticulum, suggesting a cru…
			Unc45b	KO < WT	0.606	-0.199	protein unc-45 homolog B [Mus musculus]	Unc-45 homolog B (C. elegans); Acts as a co-chaperone for HSP90 and is required for proper folding of the myosin motor domain. Plays a role in sarcomere formation during muscle cell development. Is necessary for normal early lens development; Armadillo-like helical domain containing
		YES	Tardbp	KO < WT	0.611	-0.0898	TAR DNA-binding protein 43 isoform 1 [Mus musculus]	TAR DNA-binding protein 43; DNA and RNA-binding protein which regulates transcription and splicing. Involved in the regulation of CFTR splicing. It promotes CFTR exon 9 skipping by binding to the UG repeated motifs in the polymorphic region near the 3'-splice site of this exon. The resulting aberrant splicing is associated with pathological features typical of cystic fibrosis. May also be involve…
			Etfb	KO > WT	0.612	0.157	electron transfer flavoprotein subunit beta [Mus musculus]	Electron-transfer-flavoprotein, beta polypeptide; Heterodimeric electron transfer flavoprotein that accepts electrons from several mitochondrial dehydrogenases, including acyl-CoA dehydrogenases, glutaryl-CoA and sarcosine dehydrogenase. It transfers the electrons to the main mitochondrial respiratory chain via ETF-ubiquinone oxidoreductase (Probable). Required for normal mitochondrial fatty acid…
			Ppp1r3a	KO < WT	0.613	-0.112	protein phosphatase 1 regulatory subunit 3A [Mus musculus]	Protein phosphatase 1 glycogen-associated regulatory subunit; Seems to act as a glycogen-targeting subunit for PP1. PP1 is essential for cell division, and participates in the regulation of glycogen metabolism, muscle contractility and protein synthesis. Plays an important role in glycogen synthesis but is not essential for insulin activation of glycogen synthase (By similarity); Protein phosphat…
		YES	Acacb	KO < WT	0.613	-0.116	PREDICTED: acetyl-CoA carboxylase 2 isoform X1 [Mus musculus]	acetyl-CoA carboxylase beta; Catalyzes the ATP-dependent carboxylation of acetyl-CoA to malonyl-CoA. Carries out three functions: biotin carboxyl carrier protein, biotin carboxylase and carboxyltransferase. Involved in inhibition of fatty acid and glucose oxidation and enhancement of fat storage (By similarity). May play a role in regulation of mitochondrial fatty acid oxidation through malonyl- …
			Myl3	KO > WT	0.613	0.361	myosin light chain 3 [Mus musculus]	Myosin light chain 1, slow-twitch muscle B/ventricular isoform; Regulatory light chain of myosin. Does not bind calcium; EF-hand domain containing
			Myh1	KO > WT	0.613	0.114	PREDICTED: myosin-1 isoform X1 [Mus musculus]_x000D_ PREDICTED: myosin-3 isoform X1 [Mus musculus]_x000D_ myosin-4 [Mus musculus]_x000D_ myosin-2 [Mus musculus]_x000D_ myosin-9 [Mus musculus]_x000D_ myosin-13 [Mus musculus]_x000D_ PREDICTED: myosin-7 isoform X1 [Mus musculus]_x000D_ myosin-8 [Mus musculus]	Myosin, heavy chain 1, skeletal muscle, adult; Muscle contraction; Belongs to the TRAFAC class myosin-kinesin ATPase superfamily. Myosin family.
			Myh4	KO < WT	0.614	-0.119	myosin-4 [Mus musculus]_x000D_ myosin-2 [Mus musculus]_x000D_ myosin-8 [Mus musculus]	Myosin heavy chain, skeletal muscle, fetal; Muscle contraction; Myosin heavy chains
			Metap2	KO > WT	0.618	3.58	PREDICTED: methionine aminopeptidase 2 isoform X1 [Mus musculus]	Initiation factor 2-associated 67 kDa glycoprotein; Cotranslationally removes the N-terminal methionine from nascent proteins. The N-terminal methionine is often cleaved when the second residue in the primary sequence is small and uncharged (Met-Ala-, Cys, Gly, Pro, Ser, Thr, or Val). The catalytic activity of human METAP2 toward Met-Val peptides is consistently two orders of magnitude higher tha…
			Adssl1	KO < WT	0.62	-0.14	adenylosuccinate synthetase isozyme 1 [Mus musculus]	Adenylosuccinate synthetase, muscle isozyme; Component of the purine nucleotide cycle (PNC), which interconverts IMP and AMP to regulate the nucleotide levels in various tissues, and which contributes to glycolysis and ammoniagenesis. Catalyzes the first committed step in the biosynthesis of AMP from IMP.
			Ykt6	KO > WT	0.626	0.144	synaptobrevin homolog YKT6 [Mus musculus]	YKT6 v-SNARE homolog (S. cerevisiae); Vesicular soluble NSF attachment protein receptor (v- SNARE) mediating vesicle docking and fusion to a specific acceptor cellular compartment. Functions in endoplasmic reticulum to Golgi transport; as part of a SNARE complex composed of GOSR1, GOSR2 and STX5. Functions in early/recycling endosome to TGN transport; as part of a SNARE complex composed of BET1L,…
			Ehbp1l1	KO < WT	0.627	-0.097	EH domain-binding protein 1-like protein 1 isoform a [Mus musculus]	EH domain-binding protein 1-like protein 1; May act as Rab effector protein and play a role in vesicle trafficking; NT-C2 domain containing
		YES	Pdlim7	KO > WT	0.632	0.0894	PDZ and LIM domain protein 7 isoform a [Mus musculus]	PDZ and LIM domain 7 (enigma); May function as a scaffold on which the coordinated assembly of proteins can occur. May play a role as an adapter that, via its PDZ domain, localizes LIM-binding proteins to actin filaments of both skeletal muscle and nonmuscle tissues. Involved in both of the two fundamental mechanisms of bone formation, direct bone formation (e.g. embryonic flat bones mandible and…
		YES	Prkab2	KO > WT	0.633	0.148	PREDICTED: 5'-AMP-activated protein kinase subunit beta-2 isoform X1 [Mus musculus]	Protein kinase, AMP-activated, beta 2 non-catalytic subunit; Non-catalytic subunit of AMP-activated protein kinase (AMPK), an energy sensor protein kinase that plays a key role in regulating cellular energy metabolism. In response to reduction of intracellular ATP levels, AMPK activates energy-producing pathways and inhibits energy-consuming processes: inhibits protein, carbohydrate and lipid bio…
			Pptc7	KO < WT	0.634	-0.0704	protein phosphatase PTC7 homolog [Mus musculus]	PTC7 protein phosphatase homolog
			Actr1a	KO > WT	0.636	0.0962	alpha-centractin [Mus musculus]	ARP1 actin-related protein 1 homolog A, centractin alpha (yeast); Component of a multi-subunit complex involved in microtubule based vesicle motility. It is associated with the centrosome; Actin related proteins
	YES		Ryr1	KO < WT	0.637	-0.0512	PREDICTED: ryanodine receptor 1 isoform X1 [Mus musculus]	Skeletal muscle calcium release channel; Calcium channel that mediates the release of Ca(2+) from the sarcoplasmic reticulum into the cytoplasm and thereby plays a key role in triggering muscle contraction following depolarization of T-tubules. Repeated very high-level exercise increases the open probability of the channel and leads to Ca(2+) leaking into the cytoplasm. Can also mediate the relea…
			Eif3i	KO > WT	0.638	0.0772	eukaryotic translation initiation factor 3 subunit I [Mus musculus]	Eukaryotic translation initiation factor 3, subunit I; Component of the eukaryotic translation initiation factor 3 (eIF-3) complex, which is required for several steps in the initiation of protein synthesis. The eIF-3 complex associates with the 40S ribosome and facilitates the recruitment of eIF-1, eIF-1A, eIF-2:GTP:methionyl-tRNAi and eIF-5 to form the 43S pre- initiation complex (43S PIC). The…
			Myh1	KO > WT	0.642	0.157	PREDICTED: myosin-1 isoform X1 [Mus musculus]_x000D_ PREDICTED: myosin-3 isoform X1 [Mus musculus]_x000D_ myosin-4 [Mus musculus]_x000D_ myosin-8 [Mus musculus]	Myosin, heavy chain 1, skeletal muscle, adult; Muscle contraction; Belongs to the TRAFAC class myosin-kinesin ATPase superfamily. Myosin family.
			Pygm	KO > WT	0.643	0.11	glycogen phosphorylase, muscle form [Mus musculus]
		YES	Klhl41	KO < WT	0.643	-0.161	kelch-like protein 41 [Mus musculus]	Kelch repeat and BTB domain-containing protein 10; Involved in skeletal muscle development and differentiation. Regulates proliferation and differentiation of myoblasts and plays a role in myofibril assembly by promoting lateral fusion of adjacent thin fibrils into mature, wide myofibrils. Required for pseudopod elongation in transformed cells; BTB domain containing
		YES	Prag1	KO > WT	0.644	0.168	PREDICTED: tyrosine-protein kinase SgK223 isoform X1 [Mus musculus]	PEAK1-related kinase-activating pseudokinase 1; Tyrosine-protein kinase SgK223
	YES	YES	Tmem38a	KO < WT	0.644	-0.0578	trimeric intracellular cation channel type A [Mus musculus]	Trimeric intracellular cation channel type A; Monovalent cation channel required for maintenance of rapid intracellular calcium release. May act as a potassium counter-ion channel that functions in synchronization with calcium release from intracellular stores.
			Fkbp1a	KO < WT	0.647	-0.0572	peptidyl-prolyl cis-trans isomerase FKBP1A isoform 1 [Mus musculus]	Peptidyl-prolyl cis-trans isomerase FKBP1A; Keeps in an inactive conformation TGFBR1, the TGF-beta type I serine/threonine kinase receptor, preventing TGF-beta receptor activation in absence of ligand. Recruits SMAD7 to ACVR1B which prevents the association of SMAD2 and SMAD3 with the activin receptor complex, thereby blocking the activin signal. May modulate the RYR1 calcium channel activity. PP…
			Rragd	KO < WT	0.647	-0.105	ras-related GTP-binding protein D [Mus musculus]	Ras-related GTP-binding protein D; Guanine nucleotide-binding protein forming heterodimeric Rag complexes required for the amino acid-induced relocalization of mTORC1 to the lysosomes and its subsequent activation by the GTPase RHEB. This is a crucial step in the activation of the TOR signaling cascade by amino acids.
		YES	Hdgf	KO < WT	0.651	-0.129	hepatoma-derived growth factor isoform 1 [Mus musculus]	High mobility group protein 1-like 2; Heparin-binding protein, with mitogenic activity for fibroblasts. Acts as a transcriptional repressor; Heparin binding growth factor family
			Eno3	KO > WT	0.652	0.132	PREDICTED: beta-enolase isoform X1 [Mus musculus]	2-phospho-D-glycerate hydro-lyase; Appears to have a function in striated muscle development and regeneration; Belongs to the enolase family.
		YES	Smyd1	KO < WT	0.658	-0.116	histone-lysine N-methyltransferase Smyd1 isoform 1 [Mus musculus]	Histone-lysine N-methyltransferase SMYD1; Methylates histone H3 at 'Lys-4' (H3K4me), seems able to perform both mono-, di-, and trimethylation. Acts as a transcriptional repressor. Essential for cardiomyocyte differentiation and cardiac morphogenesis; Belongs to the class V-like SAM-binding methyltransferase superfamily.
			Eif2s1	KO > WT	0.661	0.0633	eukaryotic translation initiation factor 2 subunit 1 [Mus musculus]	Eukaryotic translation initiation factor 2, subunit 1 alpha, 35kDa; Functions in the early steps of protein synthesis by forming a ternary complex with GTP and initiator tRNA. This complex binds to a 40S ribosomal subunit, followed by mRNA binding to form a 43S pre-initiation complex. Junction of the 60S ribosomal subunit to form the 80S initiation complex is preceded by hydrolysis of the GTP bou…
			Dnaja4	KO < WT	0.661	-0.0984	PREDICTED: dnaJ homolog subfamily A member 4 isoform X1 [Mus musculus]	DnaJ (Hsp40) homolog, subfamily A, member 4; DnaJ heat shock protein family member A4
			Sgca	KO < WT	0.662	-0.059	PREDICTED: alpha-sarcoglycan isoform X1 [Mus musculus]	Sarcoglycan, alpha (50kDa dystrophin-associated glycoprotein); Component of the sarcoglycan complex, a subcomplex of the dystrophin-glycoprotein complex which forms a link between the F-actin cytoskeleton and the extracellular matrix.
			Mybpc1	KO < WT	0.662	-0.0721	PREDICTED: myosin-binding protein C, slow-type isoform X12 [Mus musculus]_x000D_ PREDICTED: myosin-binding protein C, slow-type isoform X1 [Mus musculus]	C-protein, skeletal muscle slow isoform; Thick filament-associated protein located in the crossbridge region of vertebrate striated muscle a bands. In vitro it binds MHC, F-actin and native thin filaments, and modifies the activity of actin-activated myosin ATPase. It may modulate muscle contraction or may play a more structural role; Belongs to the immunoglobulin superfamily. MyBP family.
		YES	Add1	KO < WT	0.669	-0.138	PREDICTED: alpha-adducin isoform X1 [Mus musculus]	Erythrocyte adducin subunit alpha; Membrane-cytoskeleton-associated protein that promotes the assembly of the spectrin-actin network. Binds to calmodulin.
			Dcn	KO < WT	0.669	-0.0862	decorin preproprotein [Mus musculus]	Bone proteoglycan II; May affect the rate of fibrils formation; Small leucine rich repeat proteoglycans
		YES	Eif4g1	KO < WT	0.671	-0.124	PREDICTED: eukaryotic translation initiation factor 4 gamma 1 isoform X1 [Mus musculus]	Eukaryotic translation initiation factor 4 gamma, 1; Component of the protein complex eIF4F, which is involved in the recognition of the mRNA cap, ATP-dependent unwinding of 5'-terminal secondary structure and recruitment of mRNA to the ribosome; Parkinson disease associated genes
		YES	Marcks	KO > WT	0.681	0.116	myristoylated alanine-rich C-kinase substrate [Mus musculus]	Protein kinase C substrate, 80 kDa protein, light chain; MARCKS is the most prominent cellular substrate for protein kinase C. This protein binds calmodulin, actin, and synapsin. MARCKS is a filamentous (F) actin cross-linking protein.
		YES	Gapdh	KO < WT	0.683	-0.13	glyceraldehyde-3-phosphate dehydrogenase isoform 1 [Mus musculus]	Glyceraldehyde-3-phosphate dehydrogenase; Has both glyceraldehyde-3-phosphate dehydrogenase and nitrosylase activities, thereby playing a role in glycolysis and nuclear functions, respectively. Participates in nuclear events including transcription, RNA transport, DNA replication and apoptosis. Nuclear functions are probably due to the nitrosylase activity that mediates cysteine S-nitrosylation o…
			Nefm	KO < WT	0.683	-0.251	neurofilament medium polypeptide [Mus musculus]	Neurofilament, medium polypeptide; Neurofilaments usually contain three intermediate filament proteins: L, M, and H which are involved in the maintenance of neuronal caliber.
YES (Fan et al 2023)		YES	Akt2	KO < WT	0.684	-0.0738	PREDICTED: RAC-beta serine/threonine-protein kinase isoform X1 [Mus musculus]	V-akt murine thymoma viral oncogene homolog 2; AKT2 is one of 3 closely related serine/threonine- protein kinases (AKT1, AKT2 and AKT3) called the AKT kinase, and which regulate many processes including metabolism, proliferation, cell survival, growth and angiogenesis. This is mediated through serine and/or threonine phosphorylation of a range of downstream substrates. Over 100 substrate candidat…
		YES	Fhod1	KO < WT	0.685	-0.127	FH1/FH2 domain-containing protein 1 [Mus musculus]	Formin homology 2 domain-containing protein 1; Required for the assembly of F-actin structures, such as stress fibers. Depends on the Rho-ROCK cascade for its activity. Contributes to the coordination of microtubules with actin fibers and plays a role in cell elongation. Acts synergistically with ROCK1 to promote SRC-dependent non-apoptotic plasma membrane blebbing; Armadillo-like helical domain …
			Osbp	KO > WT	0.687	3.92	oxysterol-binding protein 1 [Mus musculus]	Oxysterol-binding protein 1; Lipid transporter involved in lipid countertransport between the Golgi complex and membranes of the endoplasmic reticulum: specifically exchanges sterol with phosphatidylinositol 4-phosphate (PI4P), delivering sterol to the Golgi in exchange for PI4P, which is degraded by the SAC1/SACM1L phosphatase in the endoplasmic reticulum. Binds cholesterol and a range of oxyste…
			Myl6	KO > WT	0.688	0.239	myosin light polypeptide 6 isoform a [Mus musculus]	Myosin, light chain 6, alkali, smooth muscle and non-muscle; Regulatory light chain of myosin. Does not bind calcium; EF-hand domain containing
			Tcap	KO > WT	0.688	0.0756	telethonin [Mus musculus]	Titin cap protein; Muscle assembly regulating factor. Mediates the antiparallel assembly of titin (TTN) molecules at the sarcomeric Z-disk.
YES (Zastrow 2006)		YES	Ttn	KO < WT	0.693	-0.078	PREDICTED: titin isoform X1 [Mus musculus]	Rhabdomyosarcoma antigen MU-RMS-40.14; Key component in the assembly and functioning of vertebrate striated muscles. By providing connections at the level of individual microfilaments, it contributes to the fine balance of forces between the two halves of the sarcomere. The size and extensibility of the cross-links are the main determinants of sarcomere extensibility properties of muscle. In non-…
			Hrc	KO > WT	0.693	0.103	sarcoplasmic reticulum histidine-rich calcium-binding protein precursor [Mus musculus]	Sarcoplasmic reticulum histidine-rich calcium-binding protein; May play a role in the regulation of calcium sequestration or release in the SR of skeletal and cardiac muscle.
		YES	Speg	KO > WT	0.695	0.116	PREDICTED: striated muscle-specific serine/threonine-protein kinase isoform X1 [Mus musculus]	Striated muscle preferentially expressed protein kinase; Isoform 3 may have a role in regulating the growth and differentiation of arterial smooth muscle cells; I-set domain containing
		YES	Taf15	KO > WT	0.695	0.116	TATA-binding protein-associated factor 2N [Mus musculus]	TAF15 RNA polymerase II, TATA box binding protein (TBP)-associated factor, 68kDa; RNA and ssDNA-binding protein that may play specific roles during transcription initiation at distinct promoters. Can enter the preinitiation complex together with the RNA polymerase II (Pol II).
			Myh13	KO < WT	0.698	-0.081	myosin-13 [Mus musculus]	Myosin heavy chain, skeletal muscle, extraocular; Fast twitching myosin mediating the high-velocity and low-tension contractions of specific striated muscles; Myosin heavy chains
			Myh1	KO > WT	0.702	0.0768	PREDICTED: myosin-1 isoform X1 [Mus musculus]_x000D_ PREDICTED: myosin-3 isoform X1 [Mus musculus]_x000D_ myosin-4 [Mus musculus]_x000D_ myosin-2 [Mus musculus]_x000D_ myosin-13 [Mus musculus]_x000D_ PREDICTED: myosin-7 isoform X1 [Mus musculus]_x000D_ myosin-8 [Mus musculus]	Myosin, heavy chain 1, skeletal muscle, adult; Muscle contraction; Belongs to the TRAFAC class myosin-kinesin ATPase superfamily. Myosin family.
		YES	Tuba1a	KO < WT	0.702	-0.0906	tubulin alpha-1A chain [Mus musculus]_x000D_ tubulin alpha-4A chain isoform 1 [Mus musculus]	Tubulin alpha-1A chain; Tubulin is the major constituent of microtubules. It binds two moles of GTP, one at an exchangeable site on the beta chain and one at a non-exchangeable site on the alpha chain; Tubulins
			Sytl4	KO < WT	0.702	-0.185	PREDICTED: synaptotagmin-like protein 4 isoform X1 [Mus musculus]	Synaptotagmin-like protein 4; Modulates exocytosis of dense-core granules and secretion of hormones in the pancreas and the pituitary. Interacts with vesicles containing negatively charged phospholipids in a Ca(2+)-independent manner (By similarity); Synaptotagmin like tandem C2 proteins
			Afg1l	KO < WT	0.706	-0.14	AFG1-like ATPase [Mus musculus]	Lactation elevated protein 1; Putative mitochondrial ATPase. Plays a role in mitochondrial morphology and mitochondrial protein metabolism. Promotes degradation of excess nuclear-encoded complex IV subunits (COX4I1, COX5A and COX6A1) and normal activity of complexes III and IV of the respiratory chain. Mediates mitochondrial translocation of TP53 and its transcription-independent apoptosis in res…
		YES	Prkaa2	KO > WT	0.708	0.155	5'-AMP-activated protein kinase catalytic subunit alpha-2 [Mus musculus]	5'-AMP-activated protein kinase catalytic subunit alpha-2; Catalytic subunit of AMP-activated protein kinase (AMPK), an energy sensor protein kinase that plays a key role in regulating cellular energy metabolism. In response to reduction of intracellular ATP levels, AMPK activates energy-producing pathways and inhibits energy-consuming processes: inhibits protein, carbohydrate and lipid biosynthe…
		YES	Sncg	KO > WT	0.711	0.263	gamma-synuclein [Mus musculus]	Synuclein, gamma (breast cancer-specific protein 1); Plays a role in neurofilament network integrity. May be involved in modulating axonal architecture during development and in the adult. In vitro, increases the susceptibility of neurofilament-H to calcium-dependent proteases (By similarity). May also function in modulating the keratin network in skin. Activates the MAPK and Elk-1 signal transdu…
		YES	Ubxn8	KO > WT	0.712	0.0929	PREDICTED: UBX domain-containing protein 6 isoform X1 [Mus musculus]	UBX domain-containing protein 6; Involved in endoplasmic reticulum-associated degradation (ERAD) for misfolded lumenal proteins, possibly by tethering VCP to the endoplasmic reticulum membrane. May play a role in reproduction; UBX domain containing
			Gys1	KO < WT	0.714	-0.0886	glycogen [starch] synthase, muscle [Mus musculus]	Glycogen [starch] synthase, muscle; Transfers the glycosyl residue from UDP-Glc to the non- reducing end of alpha-1,4-glucan; Glycosyl transferases group 1 domain containing
			Lamp3	KO > WT	0.721	0.138	lysosome-associated membrane glycoprotein 3 precursor [Mus musculus]	DC-lysosome-associated membrane glycoprotein; May play a role in dendritic cell function and in adaptive immunity; CD molecules
			Myh1	KO > WT	0.731	0.117	PREDICTED: myosin-1 isoform X1 [Mus musculus]_x000D_ PREDICTED: myosin-3 isoform X1 [Mus musculus]_x000D_ myosin-4 [Mus musculus]_x000D_ myosin-2 [Mus musculus]_x000D_ myosin-13 [Mus musculus]_x000D_ myosin-8 [Mus musculus]	Myosin, heavy chain 1, skeletal muscle, adult; Muscle contraction; Belongs to the TRAFAC class myosin-kinesin ATPase superfamily. Myosin family.
			Sptb	KO < WT	0.733	-0.0814	spectrin beta chain, erythrocytic [Mus musculus]	Spectrin beta chain, erythrocytic; Spectrin is the major constituent of the cytoskeletal network underlying the erythrocyte plasma membrane. It associates with band 4.1 and actin to form the cytoskeletal superstructure of the erythrocyte plasma membrane; Pleckstrin homology domain containing
		YES	Tubb3	KO < WT	0.734	-0.17	tubulin beta-3 chain [Mus musculus]_x000D_ tubulin beta-4B chain [Mus musculus]	Tubulin, beta 3 class III; Tubulin is the major constituent of microtubules. It binds two moles of GTP, one at an exchangeable site on the beta chain and one at a non-exchangeable site on the alpha chain. TUBB3 plays a critical role in proper axon guidance and mantainance; Belongs to the tubulin family.
		YES	Pdlim5	KO > WT	0.737	0.0579	PDZ and LIM domain protein 5 isoform ENH2 [Mus musculus]	Enigma-like PDZ and LIM domains protein; May play an important role in the heart development by scaffolding PKC to the Z-disk region. May play a role in the regulation of cardiomyocyte expansion. Overexpression promotes the development of heart hypertrophy. Contributes to the regulation of dendritic spine morphogenesis in neurons. May restrain postsynaptic growth of excitatory synapses (By simila…
			Prelp	KO < WT	0.747	-0.0592	PREDICTED: prolargin isoform X1 [Mus musculus]	Proline-arginine-rich end leucine-rich repeat protein; May anchor basement membranes to the underlying connective tissue; Small leucine rich repeat proteoglycans
			Rac1	KO > WT	0.747	0.0408	ras-related C3 botulinum toxin substrate 1 isoform 1 [Mus musculus]	Ras-related C3 botulinum toxin substrate 1 (rho family, small GTP binding protein Rac1); Plasma membrane-associated small GTPase which cycles between active GTP-bound and inactive GDP-bound states. In its active state, binds to a variety of effector proteins to regulate cellular responses such as secretory processes, phagocytosis of apoptotic cells, epithelial cell polarization and growth-factor …
		YES	Ppm1b	KO > WT	0.75	0.149	PREDICTED: protein phosphatase 1B isoform X1 [Mus musculus]	Protein phosphatase, Mg2+/Mn2+ dependent, 1B; Enzyme with a broad specificity. Dephosphorylates CDK2 and CDK6 in vitro. Dephosphorylates PRKAA1 and PRKAA2. Inhibits TBK1-mediated antiviral signaling by dephosphorylating it at 'Ser- 172'. Plays an important role in the termination of TNF-alpha- mediated NF-kappa-B activation through dephosphorylating and inactivating IKBKB/IKKB; Belongs to the PP2…
		YES	Pvalb	KO < WT	0.75	-0.129	parvalbumin alpha [Mus musculus]	Parvalbumin alpha; In muscle, parvalbumin is thought to be involved in relaxation after contraction. It binds two calcium ions; EF-hand domain containing
			Dnm1l	KO < WT	0.753	-0.0846	PREDICTED: dynamin-1-like protein isoform X10 [Mus musculus]	Dynamin family member proline-rich carboxyl-terminal domain less; Functions in mitochondrial and peroxisomal division. Mediates membrane fission through oligomerization into membrane- associated tubular structures that wrap around the scission site to constrict and sever the mitochondrial membrane through a GTP hydrolysis-dependent mechanism. Through its function in mitochondrial division, ensure…
YES (Dittmer 2013)		YES	Lmna	KO > WT	0.755	0.0977	PREDICTED: prelamin-A/C isoform X1 [Mus musculus]	Prelamin-A/C; Lamins are components of the nuclear lamina, a fibrous layer on the nucleoplasmic side of the inner nuclear membrane, which is thought to provide a framework for the nuclear envelope and may also interact with chromatin. Lamin A and C are present in equal amounts in the lamina of mammals. Plays an important role in nuclear assembly, chromatin organization, nuclear membrane and telom…
			Gnb2	KO > WT	0.756	0.0408	PREDICTED: guanine nucleotide-binding protein G(I)/G(S)/G(T) subunit beta-2 isoform X1 [Mus musculus]	Guanine nucleotide binding protein (G protein), beta polypeptide 2; Guanine nucleotide-binding proteins (G proteins) are involved as a modulator or transducer in various transmembrane signaling systems. The beta and gamma chains are required for the GTPase activity, for replacement of GDP by GTP, and for G protein- effector interaction.
			Tmod4	KO < WT	0.757	-0.0814	PREDICTED: tropomodulin-4 isoform X1 [Mus musculus]	Skeletal muscle tropomodulin; Blocks the elongation and depolymerization of the actin filaments at the pointed end. The Tmod/TM complex contributes to the formation of the short actin protofilament, which in turn defines the geometry of the membrane skeleton; Tropomodulins
			Myh4	KO < WT	0.757	-0.0658	myosin-4 [Mus musculus]	Myosin heavy chain, skeletal muscle, fetal; Muscle contraction; Myosin heavy chains
			Col1a1	KO < WT	0.759	-0.142	collagen alpha-1(I) chain preproprotein [Mus musculus]	Collagen alpha-1(I) chain; Type I collagen is a member of group I collagen (fibrillar forming collagen); Collagens
			Sh3bgr	KO > WT	0.761	0.0784	SH3 domain-binding glutamic acid-rich protein [Mus musculus]	SH3 domain-binding glutamic acid-rich protein; SH3 domain binding glutamate rich protein; Belongs to the SH3BGR family.
		YES	Tnni2	KO > WT	0.761	0.0966	PREDICTED: troponin I, fast skeletal muscle isoform X1 [Mus musculus]	Troponin I type 2 (skeletal, fast); Troponin I is the inhibitory subunit of troponin, the thin filament regulatory complex which confers calcium-sensitivity to striated muscle actomyosin ATPase activity.
		YES	H1f3	KO < WT	0.766	-0.0904	histone H1.3 [Mus musculus]	Histone cluster 1, H1d; Histone H1 protein binds to linker DNA between nucleosomes forming the macromolecular structure known as the chromatin fiber. Histones H1 are necessary for the condensation of nucleosome chains into higher-order structured fibers. Acts also as a regulator of individual gene transcription through chromatin remodeling, nucleosome spacing and DNA methylation (By similarity).
		YES	Cct4	KO < WT	0.767	-0.0474	T-complex protein 1 subunit delta [Mus musculus]	Chaperonin containing TCP1, subunit 4 (delta); Molecular chaperone; assists the folding of proteins upon ATP hydrolysis. As part of the BBS/CCT complex may play a role in the assembly of BBSome, a complex involved in ciliogenesis regulating transports vesicles to the cilia. Known to play a role, in vitro, in the folding of actin and tubulin; Chaperonins
			Bgn	KO < WT	0.768	-0.0626	PREDICTED: biglycan isoform X1 [Mus musculus]	Bone/cartilage proteoglycan I; May be involved in collagen fiber assembly; Small leucine rich repeat proteoglycans
			Myom2	KO > WT	0.771	0.0664	PREDICTED: myomesin-2 isoform X1 [Mus musculus]	165 kDa connectin-associated protein; Major component of the vertebrate myofibrillar M band. Binds myosin, titin, and light meromyosin. This binding is dose dependent; Fibronectin type III domain containing
		YES	Hspb6	KO < WT	0.771	-0.0522	heat shock protein beta-6 [Mus musculus]	Heat shock protein, alpha-crystallin-related, B6; Small heat shock protein which functions as a molecular chaperone probably maintaining denatured proteins in a folding- competent state. Seems to have versatile functions in various biological processes. Plays a role in regulating muscle function such as smooth muscle vasorelaxation and cardiac myocyte contractility. May regulate myocardial angiog…
			Myom1	KO > WT	0.778	0.061	myomesin-1 isoform 1 [Mus musculus]	190 kDa connectin-associated protein; Major component of the vertebrate myofibrillar M band. Binds myosin, titin, and light meromyosin. This binding is dose dependent; Fibronectin type III domain containing
			Arfgap2	KO < WT	0.785	-0.065	ADP-ribosylation factor GTPase-activating protein 2 isoform 1 [Mus musculus]	ADP-ribosylation factor GTPase activating protein 2; GTPase-activating protein (GAP) for ADP ribosylation factor 1 (ARF1). Implicated in coatomer-mediated protein transport between the Golgi complex and the endoplasmic reticulum. Hydrolysis of ARF1-bound GTP may lead to dissociation of coatomer from Golgi-derived membranes to allow fusion with target membranes; ArfGAPs
		YES	Bin1	KO < WT	0.788	-0.062	PREDICTED: myc box-dependent-interacting protein 1 isoform X19 [Mus musculus]	Box-dependent myc-interacting protein 1; May be involved in regulation of synaptic vesicle endocytosis. May act as a tumor suppressor and inhibits malignant cell transformation; N-BAR domain containing
			Phka1	KO < WT	0.789	-0.0849	phosphorylase b kinase regulatory subunit alpha, skeletal muscle isoform isoform 1 [Mus musculus]	Phosphorylase b kinase regulatory subunit alpha, skeletal muscle isoform; Phosphorylase b kinase catalyzes the phosphorylation of serine in certain substrates, including troponin I. The alpha chain may bind calmodulin.
			Fmod	KO > WT	0.79	0.0386	fibromodulin precursor [Mus musculus]	Keratan sulfate proteoglycan fibromodulin; Affects the rate of fibrils formation. May have a primary role in collagen fibrillogenesis (By similarity); Belongs to the small leucine-rich proteoglycan (SLRP) family. SLRP class II subfamily.
			Eif4g2	KO > WT	0.791	0.0474	eukaryotic translation initiation factor 4 gamma 2 isoform 1 [Mus musculus]	Eukaryotic translation initiation factor 4 gamma, 2; Appears to play a role in the switch from cap-dependent to IRES-mediated translation during mitosis, apoptosis and viral infection. Cleaved by some caspases and viral proteases.
			Myl2	KO > WT	0.791	0.0915	PREDICTED: myosin regulatory light chain 2, ventricular/cardiac muscle isoform isoform X1 [Mus musculus]	Myosin regulatory light chain 2, ventricular/cardiac muscle isoform; Contractile protein that plays a role in heart development and function (By similarity). Following phosphorylation, plays a role in cross-bridge cycling kinetics and cardiac muscle contraction by increasing myosin lever arm stiffness and promoting myosin head diffusion; as a consequence of the increase in maximum contraction for…
			Reep5	KO < WT	0.792	-0.0472	receptor expression-enhancing protein 5 [Mus musculus]	Receptor expression-enhancing protein 5; May promote functional cell surface expression of olfactory receptors; Belongs to the DP1 family.
YES (Depreux 2015)		YES	Phb	KO > WT	0.793	0.107	prohibitin [Mus musculus]	Prohibitin; Prohibitin inhibits DNA synthesis. It has a role in regulating proliferation. As yet it is unclear if the protein or the mRNA exhibits this effect. May play a role in regulating mitochondrial respiration activity and in aging.
		YES	Tnni2	KO > WT	0.807	0.106	PREDICTED: troponin T, fast skeletal muscle isoform X26 [Mus musculus]	Troponin I type 2 (skeletal, fast); Troponin I is the inhibitory subunit of troponin, the thin filament regulatory complex which confers calcium-sensitivity to striated muscle actomyosin ATPase activity.
			Rab10	KO > WT	0.809	0.0422	ras-related protein Rab-10 [Mus musculus]	RAB10, member RAS oncogene family; The small GTPases Rab are key regulators of intracellular membrane trafficking, from the formation of transport vesicles to their fusion with membranes. Rabs cycle between an inactive GDP-bound form and an active GTP-bound form that is able to recruit to membranes different set of downstream effectors directly responsible for vesicle formation, movement, tetheri…
			Pdlim3	KO < WT	0.809	-0.0527	PREDICTED: PDZ and LIM domain protein 3 isoform X1 [Mus musculus]	Alpha-actinin-2-associated LIM protein; May play a role in the organization of actin filament arrays within muscle cells; LIM domain containing
		YES	Hspb7	KO > WT	0.809	0.0423	heat shock protein beta-7 [Mus musculus]	Heat shock protein family B member 7
		YES	Tnni2	KO > WT	0.818	0.0667	PREDICTED: troponin T, fast skeletal muscle isoform X27 [Mus musculus]	Troponin I type 2 (skeletal, fast); Troponin I is the inhibitory subunit of troponin, the thin filament regulatory complex which confers calcium-sensitivity to striated muscle actomyosin ATPase activity.
			Pgm1	KO < WT	0.821	-0.0387	phosphoglucomutase-2 [Mus musculus]	Glucose phosphomutase 1; This enzyme participates in both the breakdown and synthesis of glucose; Belongs to the phosphohexose mutase family.
			Ywhag	KO > WT	0.826	0.0372	14-3-3 protein gamma [Mus musculus]	Tyrosine 3-monooxygenase/tryptophan 5-monooxygenase activation protein, gamma; Adapter protein implicated in the regulation of a large spectrum of both general and specialized signaling pathways. Binds to a large number of partners, usually by recognition of a phosphoserine or phosphothreonine motif. Binding generally results in the modulation of the activity of the binding partner; Belongs to th…
		YES	Ddx19b	KO < WT	0.83	-0.103	ATP-dependent RNA helicase DDX19B isoform 1 [Mus musculus]	DEAD (Asp-Glu-Ala-Asp) box polypeptide 19B; ATP-dependent RNA helicase involved in mRNA export from the nucleus. Rather than unwinding RNA duplexes, DDX19B functions as a remodeler of ribonucleoprotein particles, whereby proteins bound to nuclear mRNA are dissociated and replaced by cytoplasmic mRNA binding proteins; DEAD-box helicases
		YES	Hsp90b1	KO > WT	0.83	0.0378	endoplasmin precursor [Mus musculus]	Heat shock protein 90kDa beta (Grp94), member 1; Molecular chaperone that functions in the processing and transport of secreted proteins. When associated with CNPY3, required for proper folding of Toll-like receptors (By similarity). Functions in endoplasmic reticulum associated degradation (ERAD). Has ATPase activity; Belongs to the heat shock protein 90 family.
			Cavin4	KO > WT	0.832	0.042	caveolae-associated protein 4 [Mus musculus]	Muscle-restricted coiled-coil protein; Modulates the morphology of formed caveolae in cardiomyocytes, but is not required for caveolar formation. Facilitates the recruitment of MAPK1/3 to caveolae within cardiomyocytes and regulates alpha-1 adrenergic receptor-induced hypertrophic responses in cardiomyocytes through MAPK1/3 activation. Contributes to proper membrane localization and stabilization…
			Tpm2	KO > WT	0.833	0.0801	tropomyosin beta chain isoform Tpm2.2st [Mus musculus]_x000D_ tropomyosin alpha-1 chain isoform Tpm1.1st [Mus musculus]	Tropomyosin beta chain; Tropomyosin 2; Belongs to the tropomyosin family.
		YES	Prkag1	KO > WT	0.834	0.0486	5'-AMP-activated protein kinase subunit gamma-1 [Mus musculus]	Protein kinase, AMP-activated, gamma 1 non-catalytic subunit; AMP/ATP-binding subunit of AMP-activated protein kinase (AMPK), an energy sensor protein kinase that plays a key role in regulating cellular energy metabolism. In response to reduction of intracellular ATP levels, AMPK activates energy-producing pathways and inhibits energy-consuming processes: inhibits protein, carbohydrate and lipid …
			Srl	KO > WT	0.834	0.0534	PREDICTED: sarcalumenin isoform X1 [Mus musculus]	Sarcalumenin; May be involved in the regulation of calcium transport.
			Prdx2	KO < WT	0.847	-0.078	peroxiredoxin-2 [Mus musculus]	Thioredoxin-dependent peroxide reductase 1; Thiol-specific peroxidase that catalyzes the reduction of hydrogen peroxide and organic hydroperoxides to water and alcohols, respectively. Plays a role in cell protection against oxidative stress by detoxifying peroxides and as sensor of hydrogen peroxide-mediated signaling events. Might participate in the signaling cascades of growth factors and tumor…
		YES	Ddx3x	KO < WT	0.847	-0.068	ATP-dependent RNA helicase DDX3X [Mus musculus]	DEAD (Asp-Glu-Ala-Asp) box helicase 3, X-linked; Multifunctional ATP-dependent RNA helicase. The ATPase activity can be stimulated by various ribo- and deoxynucleic acids indicative for a relaxed substrate specificity. In vitro can unwind partially double-stranded DNA with a preference for 5'- single-stranded DNA overhangs. Is involved in several steps of gene expression, such as transcription, m…
			Myh1	KO > WT	0.851	0.0372	PREDICTED: myosin-1 isoform X1 [Mus musculus]_x000D_ myosin-4 [Mus musculus]_x000D_ myosin-2 [Mus musculus]_x000D_ PREDICTED: myosin-7 isoform X1 [Mus musculus]_x000D_ myosin-8 [Mus musculus]	Myosin, heavy chain 1, skeletal muscle, adult; Muscle contraction; Belongs to the TRAFAC class myosin-kinesin ATPase superfamily. Myosin family.
			Gpi1	KO < WT	0.852	-0.0397	glucose-6-phosphate isomerase [Mus musculus]	Phosphatidylinositol N-acetylglucosaminyltransferase subunit Q; Part of the complex catalyzing the transfer of N- acetylglucosamine from UDP-N-acetylglucosamine to phosphatidylinositol, the first step of GPI biosynthesis; Belongs to the PIGQ family.
			Hk2	KO > WT	0.853	0.0152	hexokinase-2 [Mus musculus]	Muscle form hexokinase; Hexokinase 2; Belongs to the hexokinase family.
			Ptger4	KO > WT	0.86	0.042	prostaglandin E2 receptor EP4 subtype isoform 2 [Mus musculus]	Prostaglandin E receptor 4 (subtype EP4); Receptor for prostaglandin E2 (PGE2). The activity of this receptor is mediated by G(s) proteins that stimulate adenylate cyclase. Has a relaxing effect on smooth muscle. May play an important role in regulating renal hemodynamics, intestinal epithelial transport, adrenal aldosterone secretion, and uterine function.
			Myh4	KO < WT	0.861	-0.044	myosin-4 [Mus musculus]_x000D_ myosin-2 [Mus musculus]	Myosin heavy chain, skeletal muscle, fetal; Muscle contraction; Myosin heavy chains
		YES	Eef1a1	KO > WT	0.862	0.0474	elongation factor 1-alpha 1 [Mus musculus]_x000D_ elongation factor 1-alpha 2 [Mus musculus]	Eukaryotic translation elongation factor 1 alpha 1; This protein promotes the GTP-dependent binding of aminoacyl-tRNA to the A-site of ribosomes during protein biosynthesis. With PARP1 and TXK, forms a complex that acts as a T helper 1 (Th1) cell-specific transcription factor and binds the promoter of IFN-gamma to directly regulate its transcription, and is thus involved importantly in Th1 cytoki…
		YES	Prkaca	KO > WT	0.862	0.051	cAMP-dependent protein kinase catalytic subunit alpha isoform 1 [Mus musculus]	cAMP-dependent protein kinase catalytic subunit alpha; Phosphorylates a large number of substrates in the cytoplasm and the nucleus. Regulates the abundance of compartmentalized pools of its regulatory subunits through phosphorylation of PJA2 which binds and ubiquitinates these subunits, leading to their subsequent proteolysis. Phosphorylates CDC25B, ABL1, NFKB1, CLDN3, PSMC5/RPT6, PJA2, RYR2, RO…
		YES	Myoz1	KO < WT	0.864	-0.0366	myozenin-1 [Mus musculus]	Filamin-, actinin- and telethonin-binding protein; Myozenins may serve as intracellular binding proteins involved in linking Z-disk proteins such as alpha-actinin, gamma- filamin, TCAP/telethonin, LDB3/ZASP and localizing calcineurin signaling to the sarcomere. Plays an important role in the modulation of calcineurin signaling. May play a role in myofibrillogenesis.
			Ahsa1	KO > WT	0.864	0.0326	activator of 90 kDa heat shock protein ATPase homolog 1 [Mus musculus]	AHA1, activator of heat shock 90kDa protein ATPase homolog 1 (yeast); Acts as a co-chaperone of HSP90AA1. Activates the ATPase activity of HSP90AA1 leading to increase in its chaperone activity. Competes with the inhibitory co-chaperone FNIP1 for binding to HSP90AA1, thereby providing a reciprocal regulatory mechanism for chaperoning of client proteins.
			Gpd1	KO > WT	0.866	0.0278	glycerol-3-phosphate dehydrogenase [NAD(+)], cytoplasmic [Mus musculus]	Glycerol-3-phosphate dehydrogenase 1; Belongs to the NAD-dependent glycerol-3-phosphate dehydrogenase family.
			Myh1	KO < WT	0.868	-0.0356	PREDICTED: myosin-1 isoform X1 [Mus musculus]_x000D_ myosin-4 [Mus musculus]_x000D_ myosin-2 [Mus musculus]	Myosin, heavy chain 1, skeletal muscle, adult; Muscle contraction; Belongs to the TRAFAC class myosin-kinesin ATPase superfamily. Myosin family.
			Myh4	KO < WT	0.868	-0.0464	myosin-4 [Mus musculus]_x000D_ PREDICTED: myosin-7 isoform X1 [Mus musculus]	Myosin heavy chain, skeletal muscle, fetal; Muscle contraction; Myosin heavy chains
			Trf	KO > WT	0.873	0.0322	serotransferrin precursor [Mus musculus]	Eosinophil differentiation factor; Factor that induces terminal differentiation of late- developing B-cells to immunoglobulin secreting cells; Belongs to the IL-5 family.
			Pgk1	KO > WT	0.877	0.0336	phosphoglycerate kinase 1 [Mus musculus]	Cell migration-inducing gene 10 protein; In addition to its role as a glycolytic enzyme, it seems that PGK-1 acts as a polymerase alpha cofactor protein (primer recognition protein). May play a role in sperm motility.
		YES	Obscn	KO < WT	0.878	-0.0248	obscurin isoform 2 [Mus musculus]	Obscurin, cytoskeletal calmodulin and titin-interacting RhoGEF; Fibronectin type III domain containing
			Cct2	KO > WT	0.88	0.0332	PREDICTED: T-complex protein 1 subunit beta isoform X1 [Mus musculus]	Chaperonin containing TCP1, subunit 2 (beta); Molecular chaperone; assists the folding of proteins upon ATP hydrolysis. As part of the BBS/CCT complex may play a role in the assembly of BBSome, a complex involved in ciliogenesis regulating transports vesicles to the cilia. Known to play a role, in vitro, in the folding of actin and tubulin; Chaperonins
			Phkg1	KO > WT	0.882	0.0474	phosphorylase b kinase gamma catalytic chain, skeletal muscle/heart isoform [Mus musculus]	Phosphorylase b kinase gamma catalytic chain, skeletal muscle/heart isoform; Catalytic subunit of the phosphorylase b kinase (PHK), which mediates the neural and hormonal regulation of glycogen breakdown (glycogenolysis) by phosphorylating and thereby activating glycogen phosphorylase. In vitro, phosphorylates PYGM, TNNI3, MAPT/TAU, GAP43 and NRGN/RC3 (By similarity).
		YES	Hnrnpd	KO < WT	0.884	-0.035	PREDICTED: heterogeneous nuclear ribonucleoprotein D0 isoform X1 [Mus musculus]	Heterogeneous nuclear ribonucleoprotein D (AU-rich element RNA binding protein 1, 37kDa); Binds with high affinity to RNA molecules that contain AU-rich elements (AREs) found within the 3'-UTR of many proto- oncogenes and cytokine mRNAs. Also binds to double- and single- stranded DNA sequences in a specific manner and functions a transcription factor. Each of the RNA-binding domains specifically …
		YES	Ppp1cc	KO > WT	0.885	0.0302	PREDICTED: serine/threonine-protein phosphatase PP1-gamma catalytic subunit isoform X1 [Mus musculus]	Serine/threonine-protein phosphatase PP1-gamma catalytic subunit; Protein phosphatase that associates with over 200 regulatory proteins to form highly specific holoenzymes which dephosphorylate hundreds of biological targets. Protein phosphatase 1 (PP1) is essential for cell division, and participates in the regulation of glycogen metabolism, muscle contractility and protein synthesis. Dephosphor…
			Rab3gap2	KO > WT	0.885	0.0324	rab3 GTPase-activating protein non-catalytic subunit [Mus musculus]	RAB3 GTPase activating protein subunit 2 (non-catalytic); Regulatory subunit of a GTPase activating protein that has specificity for Rab3 subfamily (RAB3A, RAB3B, RAB3C and RAB3D). Rab3 proteins are involved in regulated exocytosis of neurotransmitters and hormones. Rab3 GTPase-activating complex specifically converts active Rab3-GTP to the inactive form Rab3- GDP. Required for normal eye and bra…
			Mybpc1	KO < WT	0.887	-0.0514	PREDICTED: myosin-binding protein C, slow-type isoform X12 [Mus musculus]	C-protein, skeletal muscle slow isoform; Thick filament-associated protein located in the crossbridge region of vertebrate striated muscle a bands. In vitro it binds MHC, F-actin and native thin filaments, and modifies the activity of actin-activated myosin ATPase. It may modulate muscle contraction or may play a more structural role; Belongs to the immunoglobulin superfamily. MyBP family.
			Pclo	KO < WT	0.889	-0.0532	PREDICTED: protein piccolo isoform X1 [Mus musculus]	Piccolo presynaptic cytomatrix protein; May act as a scaffolding protein involved in the organization of synaptic active zones and in synaptic vesicle trafficking; C2 domain containing
			H4c17	KO < WT	0.893	-0.0572	histone H4 [Mus musculus]
		YES	Smtn	KO > WT	0.897	0.0224	PREDICTED: smoothelin isoform X3 [Mus musculus]	Smoothelin; Structural protein of the cytoskeleton; Belongs to the smoothelin family.
			Tuba3b	KO < WT	0.9	-0.0356	tubulin alpha-3 chain [Mus musculus]
			Cct3	KO < WT	0.903	-0.0236	T-complex protein 1 subunit gamma [Mus musculus]	Chaperonin containing TCP1, subunit 3 (gamma); Molecular chaperone; assists the folding of proteins upon ATP hydrolysis. As part of the BBS/CCT complex may play a role in the assembly of BBSome, a complex involved in ciliogenesis regulating transports vesicles to the cilia. Known to play a role, in vitro, in the folding of actin and tubulin; Chaperonins
		YES	Stac3	KO < WT	0.905	-0.0191	PREDICTED: SH3 and cysteine-rich domain-containing protein 3 isoform X1 [Mus musculus]	SH3 and cysteine-rich domain-containing protein 3; In skeletal muscles contraction, may play a role in neuromuscular synaptic transmission.
			Col2a1	KO < WT	0.905	-0.0604	collagen alpha-1(II) chain isoform 1 preproprotein [Mus musculus]	Collagen alpha-1(II) chain; Type II collagen is specific for cartilaginous tissues. It is essential for the normal embryonic development of the skeleton, for linear growth and for the ability of cartilage to resist compressive forces.
			Myh2	KO > WT	0.906	0.0435	myosin-2 [Mus musculus]_x000D_ PREDICTED: myosin-7 isoform X1 [Mus musculus]	Myosin, heavy chain 2, skeletal muscle, adult; Muscle contraction. Required for cytoskeleton organization (By similarity); Myosin heavy chains
		YES	Ppp1r12b	KO < WT	0.911	-0.0472	PREDICTED: protein phosphatase 1 regulatory subunit 12B isoform X1 [Mus musculus]	Protein phosphatase 1, regulatory subunit 12B; Regulates myosin phosphatase activity. Augments Ca(2+) sensitivity of the contractile apparatus; Ankyrin repeat domain containing
		YES	Csrp3	KO < WT	0.912	-0.0574	cysteine and glycine-rich protein 3 [Mus musculus]	Cysteine and glycine-rich protein 3 (cardiac LIM protein); Positive regulator of myogenesis. Acts as cofactor for myogenic bHLH transcription factors such as MYOD1, and probably MYOG and MYF6. Enhances the DNA-binding activity of the MYOD1:TCF3 isoform E47 complex and may promote formation of a functional MYOD1:TCF3 isoform E47:MEF2A complex involved in myogenesis (By similarity). Plays a crucial…
			Fam114a2	KO < WT	0.913	-0.0496	PREDICTED: protein FAM114A2 isoform X3 [Mus musculus]	Family with sequence similarity 114 member A2; Belongs to the FAM114 family.
			Col6a1	KO < WT	0.915	-0.0298	collagen alpha-1(VI) chain precursor [Mus musculus]	Collagen alpha-1(VI) chain; Collagen VI acts as a cell-binding protein; Belongs to the type VI collagen family.
YES (Zastrow 2006)		YES	Ttn	KO > WT	0.918	0.015	PREDICTED: titin isoform X1 [Mus musculus]_x000D_ titin isoform N2-A [Mus musculus]	Rhabdomyosarcoma antigen MU-RMS-40.14; Key component in the assembly and functioning of vertebrate striated muscles. By providing connections at the level of individual microfilaments, it contributes to the fine balance of forces between the two halves of the sarcomere. The size and extensibility of the cross-links are the main determinants of sarcomere extensibility properties of muscle. In non-…
		YES	Prdx1	KO > WT	0.92	0.0322	peroxiredoxin-1 [Mus musculus]	Thioredoxin-dependent peroxide reductase 2; Thiol-specific peroxidase that catalyzes the reduction of hydrogen peroxide and organic hydroperoxides to water and alcohols, respectively. Plays a role in cell protection against oxidative stress by detoxifying peroxides and as sensor of hydrogen peroxide-mediated signaling events. Might participate in the signaling cascades of growth factors and tumor…
		YES	Myo18b	KO < WT	0.922	-0.0488	PREDICTED: unconventional myosin-XVIIIb isoform X1 [Mus musculus]	Unconventional myosin-XVIIIb; May be involved in intracellular trafficking of the muscle cell when in the cytoplasm, whereas entering the nucleus, may be involved in the regulation of muscle specific genes. May play a role in the control of tumor development and progression; restored MYO18B expression in lung cancer cells suppresses anchorage-independent growth; Belongs to the TRAFAC class myosin…
			Fcgbp	KO < WT	0.926	-0.0514	IgGFc-binding protein precursor [Mus musculus]	Fc fragment of IgG binding protein
			Neb	KO < WT	0.928	-0.0144	PREDICTED: nebulin isoform X22 [Mus musculus]	Nebulin
			Acta1	KO > WT	0.933	0.016	actin, alpha skeletal muscle [Mus musculus]	Actin, alpha 1, skeletal muscle; Actins are highly conserved proteins that are involved in various types of cell motility and are ubiquitously expressed in all eukaryotic cells.
		YES	H1f4	KO < WT	0.934	-0.0202	histone H1.4 [Mus musculus]	Histone cluster 1, H1e; Histone H1 protein binds to linker DNA between nucleosomes forming the macromolecular structure known as the chromatin fiber. Histones H1 are necessary for the condensation of nucleosome chains into higher-order structured fibers. Acts also as a regulator of individual gene transcription through chromatin remodeling, nucleosome spacing and DNA methylation (By similarity).
			Myh8	KO > WT	0.943	0.0168	myosin-8 [Mus musculus]	Myosin, heavy chain 8, skeletal muscle, perinatal; Muscle contraction; Myosin heavy chains
			Hspb1	KO < WT	0.944	-0.0124	heat shock protein beta-1 [Mus musculus]	Estrogen-regulated 24 kDa protein; Small heat shock protein which functions as a molecular chaperone probably maintaining denatured proteins in a folding- competent state. Plays a role in stress resistance and actin organization. Through its molecular chaperone activity may regulate numerous biological processes including the phosphorylation and the axonal transport of neurofilament proteins.
			Parvb	KO > WT	0.946	0.0163	beta-parvin [Mus musculus]	Parvin, beta; Adapter protein that plays a role in integrin signaling via ILK and in activation of the GTPases CDC42 and RAC1 by guanine exchange factors, such as ARHGEF6. Is involved in the reorganization of the actin cytoskeleton and formation of lamellipodia. Plays a role in cell adhesion, cell spreading, establishment or maintenance of cell polarity, and cell migration; Belongs to the parvin …
		YES	Eno1	KO < WT	0.951	-0.0159	PREDICTED: alpha-enolase isoform X1 [Mus musculus]	2-phospho-D-glycerate hydro-lyase; Multifunctional enzyme that, as well as its role in glycolysis, plays a part in various processes such as growth control, hypoxia tolerance and allergic responses. May also function in the intravascular and pericellular fibrinolytic system due to its ability to serve as a receptor and activator of plasminogen on the cell surface of several cell-types such as leu…
			Col1a2	KO > WT	0.952	0.0266	collagen alpha-2(I) chain preproprotein [Mus musculus]	Collagen alpha-2(I) chain; Type I collagen is a member of group I collagen (fibrillar forming collagen); Belongs to the fibrillar collagen family.
			Gstm1	KO < WT	0.954	-0.0132	PREDICTED: glutathione S-transferase Mu 1 isoform X1 [Mus musculus]	Glutathione S-transferase Mu 1; Conjugation of reduced glutathione to a wide number of exogenous and endogenous hydrophobic electrophiles; Soluble glutathione S-transferases
		YES	Hsp90ab1	KO < WT	0.962	-0.0193	heat shock protein HSP 90-beta [Mus musculus]_x000D_ endoplasmin precursor [Mus musculus]	Heat shock protein 90kDa alpha (cytosolic), class B member 1; Molecular chaperone that promotes the maturation, structural maintenance and proper regulation of specific target proteins involved for instance in cell cycle control and signal transduction. Undergoes a functional cycle that is linked to its ATPase activity. This cycle probably induces conformational changes in the client proteins, th…
			Plg	KO < WT	0.964	-0.0118	plasminogen precursor [Mus musculus]	Plasminogen; Plasmin dissolves the fibrin of blood clots and acts as a proteolytic factor in a variety of other processes including embryonic development, tissue remodeling, tumor invasion, and inflammation. In ovulation, weakens the walls of the Graafian follicle. It activates the urokinase-type plasminogen activator, collagenases and several complement zymogens, such as C1 and C5. Cleavage of f…
			Lama2	KO < WT	0.967	-0.232	laminin subunit alpha-2 precursor [Mus musculus]	Laminin-12 subunit alpha; Binding to cells via a high affinity receptor, laminin is thought to mediate the attachment, migration and organization of cells into tissues during embryonic development by interacting with other extracellular matrix components.
		YES	Pfkm	KO < WT	0.967	-0.0125	PREDICTED: ATP-dependent 6-phosphofructokinase, muscle type isoform X1 [Mus musculus]	ATP-dependent 6-phosphofructokinase, muscle type; Catalyzes the phosphorylation of D-fructose 6-phosphate to fructose 1,6-bisphosphate by ATP, the first committing step of glycolysis; Belongs to the phosphofructokinase type A (PFKA) family. ATP-dependent PFK group I subfamily. Eukaryotic two domain clade "E" sub-subfamily.
		YES	Adh1	KO < WT	0.968	-0.013	alcohol dehydrogenase 1 [Mus musculus]	Alcohol dehydrogenase 1A, alpha polypeptide; Belongs to the zinc-containing alcohol dehydrogenase family.
			Mybpc2	KO > WT	0.968	0.012	PREDICTED: myosin-binding protein C, fast-type isoform X1 [Mus musculus]	C-protein, skeletal muscle fast isoform; Thick filament-associated protein located in the crossbridge region of vertebrate striated muscle a bands. In vitro it binds MHC, F-actin and native thin filaments, and modifies the activity of actin-activated myosin ATPase. It may modulate muscle contraction or may play a more structural role; Fibronectin type III domain containing
			Pkia	KO < WT	0.97	-0.433	PREDICTED: cAMP-dependent protein kinase inhibitor alpha isoform X1 [Mus musculus]	cAMP-dependent protein kinase inhibitor, muscle/brain isoform; Extremely potent competitive inhibitor of cAMP-dependent protein kinase activity, this protein interacts with the catalytic subunit of the enzyme after the cAMP-induced dissociation of its regulatory chains.
			Eif2s2	KO > WT	0.97	0.0197	eukaryotic translation initiation factor 2 subunit 2 [Mus musculus]	Eukaryotic translation initiation factor 2, subunit 2 beta, 38kDa; eIF-2 functions in the early steps of protein synthesis by forming a ternary complex with GTP and initiator tRNA. This complex binds to a 40S ribosomal subunit, followed by mRNA binding to form a 43S preinitiation complex. Junction of the 60S ribosomal subunit to form the 80S initiation complex is preceded by hydrolysis of the GTP…
			Myot	KO < WT	0.97	-0.007	PREDICTED: myotilin isoform X1 [Mus musculus]	Myofibrillar titin-like Ig domains protein; Component of a complex of multiple actin cross-linking proteins. Involved in the control of myofibril assembly and stability at the Z lines in muscle cells; I-set domain containing
			Tln2	KO < WT	0.971	-0.123	PREDICTED: talin-2 isoform X1 [Mus musculus]	Talin 2; As a major component of focal adhesion plaques that links integrin to the actin cytoskeleton, may play an important role in cell adhesion. Recruits PIP5K1C to focal adhesion plaques and strongly activates its kinase activity (By similarity); FERM domain containing
			Adsl	KO < WT	0.974	-0.0101	adenylosuccinate lyase [Mus musculus]	Adenylosuccinate lyase; Catalyzes two non-sequential steps in de novo AMP synthesis: converts (S)-2-(5-amino-1-(5-phospho-D- ribosyl)imidazole-4-carboxamido)succinate (SAICAR) to fumarate plus 5-amino-1-(5-phospho-D-ribosyl)imidazole-4-carboxamide, and thereby also contributes to de novo IMP synthesis, and converts succinyladenosine monophosphate (SAMP) to AMP and fumarate; Belongs to the lyase 1…
		YES	Hsp90ab1	KO > WT	0.975	0.0092	heat shock protein HSP 90-beta [Mus musculus]	Heat shock protein 90kDa alpha (cytosolic), class B member 1; Molecular chaperone that promotes the maturation, structural maintenance and proper regulation of specific target proteins involved for instance in cell cycle control and signal transduction. Undergoes a functional cycle that is linked to its ATPase activity. This cycle probably induces conformational changes in the client proteins, th…
		YES	Usp5	KO < WT	0.975	-0.26	ubiquitin carboxyl-terminal hydrolase 5 isoform 1 [Mus musculus]	Ubiquitin specific peptidase 5 (isopeptidase T); Cleaves linear and branched multiubiquitin polymers with a marked preference for branched polymers. Involved in unanchored 'Lys-48'-linked polyubiquitin disassembly. Binds linear and 'Lys- 63'-linked polyubiquitin with a lower affinity. Knock-down of USP5 causes the accumulation of p53/TP53 and an increase in p53/TP53 transcriptional activity becau…
			Aimp1	KO > WT	0.976	0.0066	aminoacyl tRNA synthase complex-interacting multifunctional protein 1 [Mus musculus]	Aminoacyl tRNA synthetase complex-interacting multifunctional protein 1; Non-catalytic component of the multisynthase complex. Stimulates the catalytic activity of cytoplasmic arginyl-tRNA synthase. Binds tRNA. Possesses inflammatory cytokine activity. Negatively regulates TGF-beta signaling through stabilization of SMURF2 by binding to SMURF2 and inhibiting its SMAD7-mediated degradation. Involv…
		YES	Eef1g	KO < WT	0.977	-0.00619	elongation factor 1-gamma [Mus musculus]	Eukaryotic translation elongation factor 1 gamma; Probably plays a role in anchoring the complex to other cellular components.
		YES	Jph2	KO < WT	0.978	-0.0106	PREDICTED: junctophilin-2 isoform X1 [Mus musculus]	Junctophilin type 2; Junctophilins contribute to the formation of junctional membrane complexes (JMCs) which link the plasma membrane with the endoplasmic or sarcoplasmic reticulum in excitable cells. Provides a structural foundation for functional cross-talk between the cell surface and intracellular calcium release channels. JPH2 is necessary for proper intracellular Ca(2+) signaling in cardiac…
			Myh7	KO > WT	0.981	0.0119	PREDICTED: myosin-7 isoform X1 [Mus musculus]	Myosin heavy chain, cardiac muscle beta isoform; Myosins are actin-based motor molecules with ATPase activity essential for muscle contraction. Forms regular bipolar thick filaments that, together with actin thin filaments, constitute the fundamental contractile unit of skeletal and cardiac muscle; Belongs to the TRAFAC class myosin-kinesin ATPase superfamily. Myosin family.
			Acyp2	KO < WT	0.982	-0.00539	acylphosphatase-2 [Mus musculus]	Acylphosphatase, muscle type isozyme; Its physiological role is not yet clear.
		YES	Tacc2	KO < WT	0.983	-0.245	PREDICTED: transforming acidic coiled-coil-containing protein 2 isoform X1 [Mus musculus]	Transforming, acidic coiled-coil containing protein 2; Plays a role in the microtubule-dependent coupling of the nucleus and the centrosome. Involved in the processes that regulate centrosome-mediated interkinetic nuclear migration (INM) of neural progenitors (By similarity). May play a role in organizing centrosomal microtubules. May act as a tumor suppressor protein. May represent a tumor progr…
			Myh1	KO < WT	0.983	-0.0042	PREDICTED: myosin-1 isoform X1 [Mus musculus]_x000D_ myosin-4 [Mus musculus]_x000D_ myosin-2 [Mus musculus]_x000D_ myosin-8 [Mus musculus]	Myosin, heavy chain 1, skeletal muscle, adult; Muscle contraction; Belongs to the TRAFAC class myosin-kinesin ATPase superfamily. Myosin family.
			Snx2	KO > WT	0.983	0.0048	PREDICTED: sorting nexin-2 isoform X1 [Mus musculus]	Transformation-related gene 9 protein; Involved in several stages of intracellular trafficking. Interacts with membranes containing phosphatidylinositol 3- phosphate (PtdIns(3P)) or phosphatidylinositol 3,5-bisphosphate (PtdIns(3,5)P2). Acts in part as component of the retromer membrane-deforming SNX-BAR subcomplex. The SNX-BAR retromer mediates retrograde transport of cargo proteins from endosom…
			Myh1	KO > WT	0.986	0.0056	PREDICTED: myosin-1 isoform X1 [Mus musculus]_x000D_ myosin-4 [Mus musculus]_x000D_ myosin-2 [Mus musculus]_x000D_ myosin-13 [Mus musculus]_x000D_ PREDICTED: myosin-7 isoform X1 [Mus musculus]_x000D_ myosin-8 [Mus musculus]	Myosin, heavy chain 1, skeletal muscle, adult; Muscle contraction; Belongs to the TRAFAC class myosin-kinesin ATPase superfamily. Myosin family.
			Hsdl2	KO < WT	0.987	-0.0042	hydroxysteroid dehydrogenase-like protein 2 isoform 1 [Mus musculus]	Short chain dehydrogenase/reductase family 13C member 1; Has apparently no steroid dehydrogenase activity; Belongs to the short-chain dehydrogenases/reductases (SDR) family.
		YES	Mindy1	KO > WT	0.988	0.204	PREDICTED: protein FAM63A isoform X1 [Mus musculus]	Ubiquitin carboxyl-terminal hydrolase MINDY-1; Hydrolase that can specifically remove 'Lys-48'-linked conjugated ubiquitin from proteins. Has exodeubiquitinase activity and has a preference for long polyubiquitin chains. May play a regulatory role at the level of protein turnover; Belongs to the peptidase MINDY family. FAM63 subfamily.
			Arf1	KO < WT	0.989	-0.0945	ADP-ribosylation factor 1 [Mus musculus]_x000D_ ADP-ribosylation factor 5 [Mus musculus]	ADP-ribosylation factor 1; GTP-binding protein that functions as an allosteric activator of the cholera toxin catalytic subunit, an ADP- ribosyltransferase. Involved in protein trafficking among different compartments. Modulates vesicle budding and uncoating within the Golgi complex. Deactivation induces the redistribution of the entire Golgi complex to the endoplasmic reticulum, suggesting a cru…
			Mybph	KO < WT	0.995	-0.001	PREDICTED: myosin-binding protein H isoform X1 [Mus musculus]	Myosin binding protein H; Binds to myosin; probably involved in interaction with thick myofilaments in the A-band; Fibronectin type III domain containing
		YES	Pias2	KO < WT	0.995	-0.00179	PREDICTED: E3 SUMO-protein ligase PIAS2 isoform X1 [Mus musculus]	Androgen receptor-interacting protein 3; Functions as an E3-type small ubiquitin-like modifier (SUMO) ligase, stabilizing the interaction between UBE2I and the substrate, and as a SUMO-tethering factor. Plays a crucial role as a transcriptional coregulator in various cellular pathways, including the STAT pathway, the p53 pathway and the steroid hormone signaling pathway. The effects of this trans…
		YES	Map2k6	KO > WT	0.996	0.001	PREDICTED: dual specificity mitogen-activated protein kinase kinase 6 isoform X1 [Mus musculus]	Dual specificity mitogen-activated protein kinase kinase 6; Dual specificity protein kinase which acts as an essential component of the MAP kinase signal transduction pathway. With MAP3K3/MKK3, catalyzes the concomitant phosphorylation of a threonine and a tyrosine residue in the MAP kinases p38 MAPK11, MAPK12, MAPK13 and MAPK14 and plays an important role in the regulation of cellular responses …
			Myh1	KO < WT	1	#NUM!	PREDICTED: myosin-1 isoform X1 [Mus musculus]_x000D_ myosin-2 [Mus musculus]_x000D_ myosin-13 [Mus musculus]_x000D_ PREDICTED: myosin-7 isoform X1 [Mus musculus]_x000D_ myosin-8 [Mus musculus]	Myosin, heavy chain 1, skeletal muscle, adult; Muscle contraction; Belongs to the TRAFAC class myosin-kinesin ATPase superfamily. Myosin family.
